# Supplementary material for: Large-scale computational polymer solubility predictions and applications to dissolution-based plastic recycling
Source: Royal Society of Chemistry journal article supplement (doi:10.1039/d3gc00404j), 2023-01-01
Supplement: d3gc00404j1.xlsx [file d3gc00404j1.xlsx]

## Sheet: All solubility predictions
Solvent name	Solvent name in cosmobase	CAS number	Boiling point (°C)	Th (°C)	Hansen solubility parameter			EVOH		PE		PET		PP		PS		PVC		Nylon 6		Nylon 66
					D	P	H	RT	Th	RT	Th	RT	Th	RT	Th	RT	Th	RT	Th	RT	Th	RT	Th
1,1,1,2-Tetrachloroethane	1,1,1,2-tetrachloroethane	630-20-6	130.5	120	18	4.4	4.2	1.50454e-05	0.865175	0.0189969	22.9168	0.00211353	1.43459	0.268136	19.965	0.448588	23.6196	0.469749	12.5395	0.0238551	3.28543	0.00553979	1.01569
1,1,1-Trichloroethane	1,1,1-trichloroethane	71-55-6	74	73	16.8	4.3	2	1.20989e-06	0.00219878	0.0357848	1.54522	0.000276723	0.0280644	0.689542	6.28198	0.815069	8.12062	0.484555	3.53827	0.000836433	0.0605676	0.000155808	0.0137163
1,1,1-Trifluoroethane	1,1,1-trifluoroethane	420-46-2	-47.5	-48.5	14.6	10	0	nan	5.39628e-14	nan	9.43335e-07	nan	2.66365e-08	nan	0.000239245	nan	0.000258681	nan	0.00125731	nan	4.6114e-08	nan	7.84541e-09
1,1,2,2-Tetrabromoethane	1,1,2,2-tetrabromoethane	79-27-6	243.5	120	21	7	8.2	5.6475e-06	0.177392	0.000765838	1.86759	0.0544526	3.15973	0.00201059	0.452499	0.111524	10.1647	0.032513	1.96492	0.00727932	0.500425	0.00180321	0.143467
1,1,2,2-Tetrachloroethane	1,1,2,2-tetrachloroethane	79-34-5	146.5	120	18.8	5.1	5.3	0.000589882	4.24464	0.0136419	18.5723	0.12086	6.23066	0.158224	13.7393	0.719569	25.7243	0.748494	14.9923	2.71469	12.3777	1.02062	6.31144
1,1,2-Trichloroethane	1,1,2-trichloroethane	79-00-5	113.8	112.8	18.2	5.3	6.8	8.74763e-05	1.67295	0.0145721	12.4701	0.0244156	4.56846	0.161921	12.13	0.894928	27.682	1.00101	16.4271	0.15801	7.32085	0.0408808	2.85224
1,1,2-Trichlorotrifluoroethane (Freon113)	1,1,2-trichloro-1,2,2-trifluoroethane	76-13-1	47.7	46.7	14.7	1.6	0	3.47517e-08	2.19185e-06	0.0275306	0.16973	1.039e-06	1.77233e-05	0.487015	1.39167	0.0200974	0.0884766	0.0291736	0.100666	1.02029e-05	0.000135832	1.30959e-06	2.01157e-05
1,1,3,3-Tetramethoxypropane	1,1,3,3-tetramethoxypropane	102-52-3	183	120	15	7.1	6.8	0.000852522	3.67735	0.0201953	19.4186	0.000792407	1.11017	0.261928	14.4103	0.983949	26.5876	1.3649	17.1174	0.00147146	1.44084	0.000650389	0.555243
1,1-Dibromoethane	1,1-dibromoethane	557-91-5	109	108	18.5	8.4	8.8	2.34341e-06	0.116941	0.00542719	4.18259	0.068271	6.00781	0.0394723	3.36955	1.82788	25.4929	0.296412	7.06664	0.00209471	0.701536	0.00046962	0.193835
1,1-Dichloro-1-Nitroethane	1,1-dichloro-1-nitroethane	594-72-9	123.5	120	16.8	12.1	4.3	4.31612e-06	0.831488	0.0240058	27.7818	0.000582233	1.32354	0.385449	26.4967	2.50649	36.8271	1.27853	20.3325	0.00343921	3.14747	0.000814012	0.984613
1,1-Dichloroacetone	1,1-dichloroacetone	513-88-2	120	119	17.1	7.6	5.4	4.8317e-05	1.88633	0.0141037	20.1375	0.00122092	2.03462	0.145008	15.3302	0.573755	31.5345	0.813987	18.7058	0.0103283	3.773	0.00319388	1.33924
1,1-Dichloroethane	1,1-dichloroethane	75-34-3	57.4	56.4	16.5	7.8	3	2.73046e-05	0.00284061	0.0263571	0.386641	0.0120946	0.166756	0.384106	2.06752	2.37748	9.94967	1.44483	4.93479	0.0289698	0.279893	0.00713333	0.0755764
1,1-Dichloroethylene	1,1-dichloroethylene	75-35-4	31.6	30.6	16.4	5.2	2.4	2.69853e-06	7.31886e-06	0.0604757	0.0991287	0.00187322	0.00328995	1.45499	1.9268	3.18297	4.17864	0.674433	0.88467	0.00441634	0.00737911	0.000831232	0.00142298
1,1-Dichloropropane	1,1-dichloropropane	78-99-9	88.1	87.1	16.1	7.8	3.5	7.91434e-06	0.0412014	0.0394173	4.45524	0.00239732	0.393251	0.74153	12.0188	1.74877	20.1183	0.858397	8.54844	0.00755337	0.654889	0.00171957	0.176924
1,1-Dichloropropene	1,1-dichloropropene	563-58-6	76.5	75.5	16.9	6.7	2.9	8.60622e-07	0.00249264	0.0586956	2.77262	0.000371116	0.0477219	1.39875	11.6349	1.80238	14.8147	0.436882	3.79533	0.000739251	0.0725687	0.000129317	0.0157518
1,1-Diethoxy Ethane	1,1-diethoxyethane	105-57-7	102.2	101.2	15	3.4	4	0.000863751	0.793183	0.0558915	12.256	0.000762955	0.400119	1.19755	21.1885	2.31087	27.2562	1.37548	13.1011	0.00171711	0.601141	0.000722414	0.216018
1,1-Difluoroethane	1,1-difluoroethane	75-37-6	-24.9	-25.9	14.9	9.3	2.9	nan	2.46494e-10	nan	2.3622e-05	nan	8.68175e-06	nan	0.0012973	nan	0.0125823	nan	0.0549104	nan	4.4903e-06	nan	1.07525e-06
1,1-Difluoroethylene	1,1-difluoroethene	75-38-7	-85.7	-86.7	15	5.7	3.6	nan	3.44775e-21	nan	4.52921e-09	nan	6.50446e-11	nan	8.28655e-05	nan	7.70853e-05	nan	1.90232e-05	nan	8.02415e-11	nan	1.23906e-11
1,1-Dimethoxy Ethane	1,1-dimethoxyethane	534-15-6	64.5	63.5	15.1	4.9	4.9	0.00231351	0.103103	0.0496111	1.06301	0.00532656	0.147394	0.937551	5.31457	5.74606	19.4294	3.62375	10.6059	0.00522642	0.134053	0.00240573	0.0564389
1,1-Dimethyl Hydrazine	1,1-dimethylhydrazine	57-14-7	63	62	15.3	5.9	11	3.84706	10.3517	0.0192243	0.423574	0.0237744	0.763592	0.158791	1.07157	0.644882	6.00068	3.66583	12.762	0.0224358	0.367536	0.0121409	0.194823
1,2,3,4-Tetramethylbenzene	1,2,3,4-tetramethylbenzene	488-23-3	205	120	18.8	0.5	0.5	8.06292e-07	0.304398	0.0536272	33.8222	0.000329584	0.838646	1.14143	32.9225	1.17272	31.5487	0.311139	10.3692	0.000360897	0.818756	7.03656e-05	0.212374
1,2,3,5-Tetramethylbenzene	1,2,3,5-tetramethylbenzene	527-53-7	198	120	18.6	0.5	0.5	7.49188e-07	0.290399	0.0561487	34.248	0.000269879	0.734921	1.2224	33.4823	1.07656	30.8736	0.294917	10.0775	0.000337135	0.780669	6.46137e-05	0.200524
1,2,3-Benzotriazole	1h-benzotriazole	95-14-7	350	120	18.7	15.6	12.4	0.000784628	4.81901	0.000468794	0.96479	0.00044386	0.940992	0.0004628	0.108069	0.00050183	0.24123	0.0233382	1.93702	0.00354237	0.923461	0.00121066	0.355656
1,2,3-Triazole	1h-1,2,3-triazole	288-36-8		25	20.7	8.8	15	0.000208461	0.000208461	7.69786e-06	7.69786e-06	1.38187e-07	1.38187e-07	4.04441e-07	4.04441e-07	1.42085e-08	1.42085e-08	0.000340182	0.000340182	6.03815e-06	6.03815e-06	1.90067e-06	1.90067e-06
1,2,3-Trichloro Propene	1,2,3-trichloropropene	96-19-5	142	120	17.8	7.8	3.4	6.02317e-05	2.48857	0.0124007	18.6948	0.0212059	5.61561	0.127565	12.871	0.920974	29.9244	0.794908	16.6937	0.0856267	7.24627	0.0219611	2.75234
1,2,3-Trichloropropane	1,2,3-trichloropropane	96-18-4	157	120	17.8	12.3	3.4	2.53863e-05	1.9632	0.00878781	15.2831	0.00468196	3.31203	0.0716885	8.70207	0.375101	24.212	0.751868	16.1754	0.0145214	4.46064	0.00362285	1.51955
1,2,4,5-Tetrachlorobenzene	1,2,4,5-tetrachlorobenzene	95-94-3	244.5	120	21.2	10.7	3.4	9.5404e-07	0.187929	0.022099	20.6275	0.000134965	0.296723	0.359201	18.039	0.312675	16.7115	0.155716	6.35097	0.000892397	0.619175	0.000175716	0.158247
1,2,4-Trichlorobenzene	1,2,4-trichlorobenzene	120-82-1	213.5	120	20.2	4.2	3.2	1.93798e-06	0.347135	0.0243322	23.3686	0.000650165	0.903131	0.398348	20.9575	0.744766	24.4507	0.263254	9.06967	0.00203362	1.29465	0.000408805	0.346291
1,2-Butadiene	1,2-butadiene	590-19-2	10.9	9.9	15	1.7	6.2	nan	1.55114e-07	nan	0.0289145	nan	0.00180395	nan	1.41043	nan	6.04891	nan	0.630253	nan	0.000656618	nan	0.000121875
1,2-Chlorobromoethylene	1-bromo-2-chloroethene	3018-09-5	84.6	83.6	17.2	6.6	2.3	7.49158e-06	0.0185032	0.0123983	1.42932	0.0351001	1.46926	0.134371	2.9802	2.0836	18.1341	0.319796	3.82553	0.0152889	0.557181	0.00332405	0.145434
1,2-Cyclohexanedione	1,2-cyclohexanedione	765-87-7	194	120	18.6	10.3	8	0.000475941	5.71252	0.00453461	5.35356	0.00101627	1.28654	0.020597	1.64687	0.240173	13.0816	1.75455	19.7654	0.000757262	1.05166	0.000339671	0.443363
1,2-Dibromoethylene	cis-dibromoethene	540-49-8	112.5	111.5	17	4.9	3	2.03751e-06	0.117845	0.0024705	3.17282	0.0295586	4.20472	0.0107805	1.52817	0.410412	20.9708	0.0849695	3.80741	0.00163888	0.543129	0.000346214	0.144696
1,2-Dichloroethylene (Cis)	cis-1,2-dichloroethene	156-59-2	60.1	59.1	17	8	3.2	6.18634e-05	0.00713529	0.0333859	0.574965	0.0873487	0.874659	0.577909	3.28696	5.74389	17.3835	1.5338	5.67083	0.183129	1.25702	0.0437721	0.350509
1,2-Dichloropropane	1,2-dichloropropane	78-87-5	95.5	94.5	17.3	7.1	2.9	6.77042e-06	0.100828	0.0256043	5.47386	0.00216827	0.717693	0.367513	10.5971	1.30323	22.4082	1.02456	11.6231	0.00350981	0.830079	0.000809176	0.234875
1,2-Dichlorotetrafluoroethane (Freon 114)	1,2-dichlorotetrafluoroethane	76-14-2	3.8	2.8	12.6	1.8	0	nan	9.75207e-11	nan	0.00239616	nan	5.86925e-09	nan	0.0837958	nan	0.000548082	nan	0.00199039	nan	1.17295e-07	nan	1.16938e-08
1,2-Diethyl Benzene	1,2-diethylbenzene	135-01-3	184	120	17.7	0.1	1	7.4688e-07	0.289959	0.0541875	33.9609	0.000279543	0.753215	1.15463	33.0495	1.09311	31.0036	0.28246	9.89559	0.00034916	0.793309	6.66201e-05	0.203542
1,2-Dihydroxybenzene (Catechol)	1,2-benzenediol	120-80-9	245	120	20	11.3	21.8	7.4398	30.9706	0.0030858	5.49046	2.49006	12.4389	0.0104403	1.57548	0.0289798	8.05875	0.118919	8.36723	nan	nan	nan	nan
1,2-Dimethoxybenzene	1,2-dimethoxybenzene	91-16-7	206	120	19.2	4.4	9.4	0.000147251	2.27425	0.00928904	13.1599	0.00163399	2.30922	0.0696841	6.70525	0.517592	25.6681	0.737944	15.0317	0.000918515	1.39807	0.000328126	0.496867
1,2-Dinitrobenzene	o-dinitrobenzene	528-29-0	318	120	20.6	11.6	3.9	2.55354e-05	1.98961	0.00353649	6.47386	0.000995632	1.3345	0.017786	2.49989	0.825687	25.0429	0.647003	14.2383	0.0112896	4.11643	0.00323538	1.54507
1,2-Ethane Dithiol	1,2-ethanedithiol	540-63-6	146	120	17.9	7.2	8.7	5.46352e-05	3.58905	0.00765978	15.9422	0.157762	18.6148	0.0457569	7.39299	3.3988	47.2225	4.83493	35.1121	0.0112574	6.17427	0.00338583	2.2979
1,2-Methylenedioxybenzene (G.C.)	1,3-benzodioxole	274-09-9	172.5	120	19	6.7	5.9	1.06169e-05	1.36786	0.0100364	17.9916	0.00221813	3.18701	0.0793305	10.4979	0.885976	34.5124	0.547742	15.6648	0.00249365	2.9042	0.000656054	0.944256
1,2-Propadiene (Allene)	propadiene	463-49-0	-34.4	-35.4	15.3	3	6.8	nan	4.744e-12	nan	8.64409e-05	nan	7.21787e-05	nan	0.0310985	nan	0.86739	nan	0.0872534	nan	5.25668e-06	nan	9.31755e-07
1,3,5-Trioxane	1,3,5-trioxane	110-88-3	114.5	113.5	18.7	9.2	8.6	0.000195819	2.88277	0.00119454	1.78385	0.000101347	0.330282	0.00212335	0.406665	0.0117229	2.90799	0.512047	12.3486	0.000209854	0.486117	8.30628e-05	0.193586
1,3-Benzenediol	resorcinol	108-46-3	280	120	18.6	8.1	20.3	3.67879	31.2179	0.000562104	1.24932	0.0485996	2.20187	0.000614651	0.161261	0.000378136	0.310161	0.0169801	2.17882	nan	nan	nan	nan
1,3-Bis(Trifluoromethyl)Benzene	1,3-bis-(triflouromethyl)-benzene	402-31-3	116	115	17	6.8	0	7.39446e-07	0.108014	0.00986086	9.02935	5.48694e-05	0.114143	0.093098	6.5195	0.0257073	2.89151	0.0266489	1.54488	0.00023534	0.232982	4.49101e-05	0.0587412
1,3-Butadiene	butadiene	106-99-0	-4.4	-5.4	14.8	2.8	5.6	nan	6.89434e-09	nan	0.00465054	nan	0.000533739	nan	0.403015	nan	2.74393	nan	0.367837	nan	0.000114276	nan	2.12326e-05
1,3-Butadiene-1-Chloro	1-chloroprene	627-22-5		25	15.6	8.5	2	6.67614e-06	6.67614e-06	0.046045	0.046045	0.0101311	0.0101311	0.848234	0.848234	4.60941	4.60941	1.03612	1.03612	0.00764318	0.00764318	0.00164119	0.00164119
1,3-Butanediol	1,3-butanediol	107-88-0	207.5	120	16.5	8.1	20.9	0.00506665	11.2975	0.0054957	6.17489	3.23015e-06	0.0678809	0.0227964	1.76149	0.00352995	1.05233	0.114004	5.75484	0.00278516	1.77257	0.0012697	0.769187
1,3-Dichloro Propane	1,3-dichloropropane	142-28-9	120.9	119.9	18	8.2	3	7.44667e-06	1.50795	0.011674	22.1969	0.00163432	3.4211	0.102444	15.1649	0.598775	34.137	1.01455	21.0854	0.00162198	2.78396	0.000397701	0.87811
1,3-Dichloro-2-Butene	1,3-dichloro-2-butene	926-57-8	131	120	16.9	7.8	2.7	8.41793e-06	1.29673	0.0156053	23.3438	0.00314275	3.691	0.1685	17.7355	0.990354	33.8867	0.836844	18.4134	0.00355762	3.12255	0.000860792	0.979695
1,3-Dichloro-2-Propanol	1,3-dichloro-2-propanol	96-23-1	176	120	17.5	9.9	14.6	0.00180304	5.7276	0.00442634	9.23942	0.000458404	1.35211	0.0208372	3.55856	0.0314275	10.8904	0.290611	13.346	0.35633	6.517	0.126771	2.76114
1,3-Dioxolane	dioxolane	646-06-0	78	77	18.1	6.6	9.3	0.00249962	0.550715	0.0116682	0.795511	0.00752862	0.575754	0.0858092	1.20782	1.5715	14.5371	4.47047	16.6488	0.00370281	0.307198	0.00171367	0.135409
1,3-Pentadiene (Trans)	1-trans-3-pentadiene	2004-70-8	42	41	15	2.5	4	2.56716e-06	4.47784e-05	0.0965515	0.372385	0.00379572	0.0187244	2.3387	4.89337	6.34923	11.9962	1.04124	2.11705	0.00188374	0.00981568	0.000382256	0.00211871
1,3-Propane Sultone	propanesultone	1120-71-4		25	18.4	16	9	8.27764e-06	8.27764e-06	4.31725e-05	4.31725e-05	1.20389e-07	1.20389e-07	9.92275e-06	9.92275e-06	7.37623e-06	7.37623e-06	0.0252786	0.0252786	2.04979e-06	2.04979e-06	7.23889e-07	7.23889e-07
1,3-Propanediol (Trimethyleneglycol)	1,3-propanediol	504-63-2	214.4	120	16.8	13.5	23.2	0.00752486	13.7561	0.00346546	4.02807	2.92435e-06	0.0546255	0.0101857	0.871731	0.00199636	0.608396	0.132378	5.86665	0.00198524	1.34279	0.000902699	0.593471
1,4-Butanediol	1,4-butadiol	110-63-4	235	120	16.6	11	20.9	0.00591527	11.4192	0.00513483	5.32814	2.99337e-06	0.0523459	0.020522	1.41206	0.00321878	0.776163	0.11909	5.30009	0.00141724	1.1974	0.00066811	0.525544
1,4-Dichlorobutane	1,4-dichlorobutane	110-56-5	161	120	18.3	7.7	2.8	5.30942e-06	1.14798	0.0128376	20.7503	0.000932131	2.1675	0.121421	14.2074	0.486652	29.1214	0.856532	18.3326	0.000979804	1.90276	0.000242007	0.58935
1,4-Dihydroxybenzene (1,4-Benzenediol)	hydroquinone	123-31-9	287	120	21	10.2	27.2	0.990667	26.3746	0.000420505	0.983672	0.00401035	0.737959	0.000375407	0.109589	0.000140756	0.148303	0.0106908	1.55253	nan	nan	nan	23.6021
1,4-Dioxane	dioxane	123-91-1	101.5	100.5	17.5	1.8	9	0.00714097	4.4389	0.0176121	5.23898	0.006846	2.22713	0.176811	5.68978	2.25326	29.9923	4.56787	24.3632	0.00514241	1.50971	0.00253436	0.674246
1,4-Dioxane (High P)	dioxane	123-91-1	101.5	100.5	17.1	6.8	7.8	0.00714097	4.4389	0.0176121	5.23898	0.006846	2.22713	0.176811	5.68978	2.25326	29.9923	4.56787	24.3632	0.00514241	1.50971	0.00253436	0.674246
1,4-Thioxane	1,4-oxathiane	15980-15-1	147	120	19	6.6	7.7	0.000712913	5.32678	0.013692	19.7311	0.0084223	6.9608	0.122788	11.8374	1.83582	40.5068	2.95061	28.3682	0.00227101	2.87449	0.000910251	1.10517
1,5-Dichloropentane	1,5-dichloro-pentane	628-76-2	179	120	18	7.8	1.5	4.00799e-06	0.89471	0.0153165	20.7557	0.000622471	1.47394	0.165007	15.0599	0.471706	25.8758	0.743081	16.1505	0.000734171	1.44161	0.000179223	0.438089
1,8-Cineole (Eucalyptol)	1,8-cineole	470-82-6	176.4	120	16.7	4.6	3.4	0.00181185	1.85974	0.0548792	32.0983	0.000113263	0.311561	1.25317	31.4772	0.608514	23.4847	0.527342	10.9335	0.000635889	0.7165	0.000273023	0.237124
1,9-Nonanediol	1-9-nonanediol	3937-56-2		25	15.7	7	15.1	0.00151836	0.00151836	0.00746081	0.00746081	1.09894e-06	1.09894e-06	0.0431897	0.0431897	0.00154281	0.00154281	0.0317897	0.0317897	0.00342746	0.00342746	0.00145127	0.00145127
1-Aminocyclopropane Carboxylic Acid	1-aminocyclopropanecarboxylicacid	22059-21-8		25	17	6.3	13.6	0.000553962	0.000553962	0.000463251	0.000463251	1.03573e-05	1.03573e-05	0.000422028	0.000422028	0.000204095	0.000204095	0.0515548	0.0515548	0.000161983	0.000161983	6.40638e-05	6.40638e-05
1-Bromonaphthalene	1-bromonaphthalene	90-11-9	281	120	20.6	3.1	4.1	5.10763e-07	0.185477	0.00956001	13.1574	0.000915552	1.23257	0.0887192	7.76387	0.444819	19.7734	0.115027	5.0387	0.000216201	0.448819	4.17859e-05	0.117773
1-Bromopropane	1-bromopropane	106-94-5	71.1	70.1	16.4	7.9	4.8	1.81614e-06	0.00228942	0.0371038	1.31005	0.0250137	0.874631	0.732471	5.95995	6.60604	21.7365	1.05639	5.67033	0.00147187	0.0903263	0.000311075	0.0222154
1-Butanethiol	butanethiol	109-79-5	98.5	97.5	16.3	5.3	4.5	1.38854e-05	0.16379	0.068028	12.5025	0.00893661	2.24544	1.51098	24.9822	6.40568	38.6751	2.19719	19.1651	0.00403811	1.05389	0.00105103	0.307682
1-Butanol	1-butanol	71-36-3	117.7	116.7	16	5.7	15.8	0.00400298	10.1357	0.0213264	18.4388	1.51822e-05	0.383087	0.191569	12.4485	0.0218602	9.21689	0.123785	10.1994	0.0184116	5.42884	0.00800584	2.36473
1-Butene	1-butene	106-98-9	-6.2	-7.2	13.2	1.3	3.9	nan	1.05307e-09	nan	0.00808945	nan	1.56448e-05	nan	1.18914	nan	0.998015	nan	0.124168	nan	1.7412e-05	nan	2.65968e-06
1-Chloro Pentane	1-chloropentane	543-59-9	107.8	106.8	16	6.9	1.9	1.52453e-06	0.13732	0.0656571	19.7752	0.000281326	0.39265	1.51761	29.8135	1.30427	28.7652	0.56809	11.4384	0.000631402	0.601375	0.000127085	0.155218
1-Chloro-1-Nitroethane	1-chloro-1-nitroethane	598-92-5		25	16.8	13.5	4.7	5.38283e-05	5.38283e-05	0.00612464	0.00612464	0.00195275	0.00195275	0.0368102	0.0368102	0.579276	0.579276	1.12213	1.12213	0.0259153	0.0259153	0.00761044	0.00761044
1-Chloro-1-Nitropropane	1-chloro-1-nitropropane	600-25-9	142	120	16.8	13	4.5	4.95709e-05	2.69505	0.0116238	19.5714	0.00240956	2.74859	0.106174	12.955	0.95626	34.9479	1.03314	20.6983	0.037308	6.78705	0.0109994	2.64363
1-Chloro-2-Ethoxy Benzene	1-chloro-2-ethoxybenzene	614-72-2	210	120	19.2	8.1	4.4	3.0553e-06	0.560932	0.0223261	23.4961	0.00103311	1.63904	0.314225	19.6706	1.09256	29.3625	0.435838	11.9453	0.000911697	1.35386	0.000204925	0.387848
1-Chloro-2-Ethyl Benzene	1-chloro-2-ethylbenzene	89-96-3	178.4	120	18.9	4.9	2.2	9.64107e-07	0.334327	0.0422553	31.4806	0.000527722	1.14033	0.835694	30.4358	1.3449	32.2613	0.310633	10.7222	0.000639021	1.11434	0.00011975	0.287238
1-Chloro-2-Methyl Propene	1-chloro-2-methyl-1-propene	513-37-1	68	67	16.1	7.1	4.2	2.05405e-06	0.00171743	0.0738107	1.96048	0.00135719	0.0712923	1.80246	10.7618	3.45036	17.2308	0.759174	4.3556	0.00161151	0.0759108	0.000314971	0.017389
1-Chloro-4-Ethoxy Benzene	1-chloro-4-ethoxybenzene	622-61-7	213	120	19.3	6.3	4.4	4.06245e-06	0.601842	0.0230787	23.7204	0.000955795	1.49362	0.329663	19.9693	1.07957	29.2432	0.43184	11.9053	0.00114213	1.46868	0.000261053	0.423065
1-Chlorobutane	1-chlorobutane	109-69-3	78.6	77.6	16.2	5.5	2	2.4228e-06	0.00786463	0.0684394	3.7171	0.000726342	0.103413	1.5889	14.0831	2.36034	19.0538	0.902305	6.88219	0.00109253	0.132836	0.00022989	0.0331308
1-Chlorohexane	1-chlorohexane	544-10-5	135	120	16.1	6.2	1.7	1.00752e-06	0.355421	0.0626626	37.2717	0.000125912	0.492413	1.43781	37.3011	0.788378	30.6297	0.380949	12.3416	0.000389269	0.888192	7.50996e-05	0.228374
1-Chloronaphthalene	1-chloronaphthalene	90-13-1	259	120	20.5	4.9	2.5	1.39519e-06	0.399293	0.0217937	22.8716	0.00126231	1.74533	0.305066	18.8984	1.10473	28.5616	0.287794	9.57251	0.000849421	1.21689	0.000170117	0.330488
1-Chloropropene	1-chloro-1-propene	590-21-6		25	15.3	6.9	2.2	4.86947e-06	4.86947e-06	0.0707672	0.0707672	0.00617785	0.00617785	1.65405	1.65405	6.639	6.639	1.33916	1.33916	0.00493297	0.00493297	0.00102831	0.00102831
1-Decanol	1-decanol	112-30-1	231.1	120	16	4.7	10.5	0.000420533	2.18734	0.0274896	22.2744	3.86904e-06	0.0962736	0.368426	17.1912	0.0187346	5.7237	0.0540595	4.85076	0.00417164	1.53063	0.00168624	0.554886
1-Decene	1-decene	872-05-9	170.5	120	15.6	1	2.2	1.68224e-07	0.106149	0.0740797	36.37	7.41456e-06	0.0658774	1.78198	35.8659	0.173904	14.1104	0.0825908	4.63494	5.73134e-05	0.22883	8.6206e-06	0.0509672
1-Heptanol	1-heptanol	111-70-6	176.4	120	16	5.3	11.7	0.00109638	4.64114	0.0263259	23.5695	6.90765e-06	0.192888	0.311067	17.2408	0.02138	7.95186	0.0764379	7.02541	0.00753364	2.83046	0.00318047	1.10452
1-Heptene	1-heptene	592-76-7	93.6	92.6	15	1.1	2.6	3.5063e-07	0.0107141	0.103971	11.5506	3.86632e-05	0.0323779	2.76252	26.1834	0.615061	14.0922	0.178493	3.52067	0.00015986	0.0856209	2.54684e-05	0.0182758
1-Hexanol	1-hexanol	111-27-3	157.6	120	15.9	5.8	12.5	0.00159803	6.2675	0.0252112	23.7816	8.86998e-06	0.259146	0.278146	16.7614	0.0218828	8.91322	0.087467	8.14206	0.0105942	3.68054	0.00451184	1.48451
1-Hexene	1-hexene	592-41-6	63.4	62.4	14.7	1.1	3	5.06236e-07	0.000290808	0.121254	2.10804	8.82895e-05	0.00481399	3.37704	13.5234	1.13989	7.22379	0.260893	1.52951	0.000266155	0.011925	4.36519e-05	0.00232965
1-Methoxy-1,3-Butadiene	1-methoxy-1,3-butadiene	3036-66-6		25	15.5	8.3	5.4	1.58844e-05	1.58844e-05	0.0263741	0.0263741	0.0053554	0.0053554	0.316706	0.316706	2.49015	2.49015	1.28507	1.28507	0.00253076	0.00253076	0.000687808	0.000687808
1-Methoxy-2-Nitrobenzene	1-methoxy-2-nitrobenzene	91-23-6	277	120	19.6	12.7	5.5	1.50701e-05	1.30918	0.00287176	5.58226	0.00031506	0.820661	0.0110019	1.80427	0.10526	13.4421	0.337141	10.5673	0.000390611	0.885938	0.000125936	0.310617
1-Methyl Cyclohexanol	1-methylcyclohexanol	590-67-0	155	120	17.1	4	12	0.00103522	4.42229	0.0296765	27.8563	1.16739e-05	0.290412	0.392199	23.0225	0.03307	13.1254	0.087628	8.45184	0.00851355	3.18132	0.00341087	1.20551
1-Methyl Imidazole	1-methylimidazol	616-47-7	198	120	19.7	15.6	11.2	0.322721	21.9328	0.00354565	5.04069	0.00529895	6.08696	0.0114717	1.29579	0.0967212	12.0053	1.10219	20.2255	0.00208614	1.60808	0.00101582	0.726902
1-Methyl Naphthalene	1-methylnaphthalene	90-12-0	244.7	120	19.7	0.8	4.7	1.53524e-06	0.463312	0.0265931	25.9081	0.00147974	2.11235	0.386516	21.9642	1.29534	31.7586	0.359351	11.0315	0.000715296	1.24721	0.00014989	0.345165
1-Methyl Vinyl Methyl Ether	2-methoxy-1-propene	116-11-0	34	33	14.8	4.2	5.6	3.56634e-05	0.0001223	0.0631831	0.128369	0.00537845	0.0120417	1.26601	1.91088	6.52524	9.10471	1.98185	2.7431	0.00346426	0.00788901	0.000993607	0.00227701
1-Naphthol	1-naphthol	90-15-3	288	120	19.7	6.3	12.3	5.44552	19.4556	0.0061538	9.82726	6.8294	14.4787	0.0358735	4.15829	0.224037	20.4601	0.229926	9.87897	nan	nan	nan	nan
1-Nitropropane	1-nitropropane	108-03-2	131.1	120	16.6	12.3	5.5	4.33001e-05	3.66394	0.010646	20.261	0.00113338	3.01038	0.0788622	11.6206	0.82534	41.3156	1.47034	27.0044	0.00446318	5.03258	0.00144033	1.88902
1-Nonanol	1-nonanol	143-08-8	213.3	120	16	4.8	11	0.000560453	2.73061	0.0274582	22.8071	4.49892e-06	0.117097	0.356591	17.4125	0.0196148	6.35415	0.0596716	5.41199	0.0046762	1.81556	0.00191913	0.67157
1-Nonene	1-nonene	124-11-8	146.9	120	15.4	1	2.2	2.05987e-07	0.124839	0.0817663	38.7912	1.14207e-05	0.0937325	2.02391	38.703	0.244211	18.2257	0.101556	5.52781	7.50661e-05	0.288594	1.14746e-05	0.0647592
1-Octanol	1-octanol	111-87-5		25	16	5	11.2	0.000759773	0.000759773	0.0271585	0.0271585	5.55579e-06	5.55579e-06	0.339133	0.339133	0.0205157	0.0205157	0.0664903	0.0664903	0.00616873	0.00616873	0.0025549	0.0025549
1-Octene	octene	111-66-0	121.2	120	15.3	1	2.4	2.66183e-07	0.153472	0.0913017	41.6045	2.00835e-05	0.147339	2.33446	41.9808	0.373596	24.0824	0.132154	6.87181	0.00010681	0.38831	1.66725e-05	0.0880645
1-Pentanol	1-pentanol	71-41-0	137.9	120	15.9	5.9	13.9	0.00245243	8.69735	0.0235602	23.6973	1.1213e-05	0.350714	0.237849	15.8038	0.0217088	9.84156	0.101039	9.51342	0.0138887	4.79123	0.00597369	2.0073
1-Pentene	pentene	109-67-1	29.9	28.9	13.9	1.4	3.8	7.75584e-07	1.64598e-06	0.14658	0.204322	0.000243775	0.000384214	4.31737	5.09155	2.43315	2.9949	0.41337	0.505409	0.000491555	0.000766093	8.33438e-05	0.000132396
1-Propanethiol	1-propanethiol	107-03-9	67.8	66.8	16.1	5.8	5.7	2.61017e-05	0.0096207	0.0675452	1.84577	0.0317337	0.91722	1.44566	9.4599	10.639	29.8841	3.80457	13.6545	0.00762206	0.250252	0.00210225	0.0730359
1-Propanol	propanol	71-23-8	97.2	96.2	16	6.8	17.4	0.00696417	4.11561	0.0176282	4.22102	1.96345e-05	0.0839479	0.131457	4.07252	0.0188373	2.78339	0.145981	5.43392	0.0240765	2.56751	0.0104503	1.134
1-Tetradecene	1-tetradecene	1120-36-1	233	120	16.1	0.5	1.9	9.27554e-08	0.0652069	0.0552603	29.5424	2.05666e-06	0.0235726	1.2281	27.8824	0.0650633	6.21873	0.0444943	2.73949	2.52247e-05	0.114789	3.6276e-06	0.0250039
2,2',5,5'-Tetrathiafulvalen	tetrathiafulvalene	31366-25-3		25	21	8.2	8.4	4.41565e-06	4.41565e-06	0.00349927	0.00349927	0.0103714	0.0103714	0.017071	0.017071	0.653035	0.653035	0.463025	0.463025	0.00256299	0.00256299	0.000603626	0.000603626
2,2,2-Trifluoro Ethanol	2,2,2-trifluoroethanol	75-89-8	74	73	15.4	8.3	16.4	0.141092	2.49142	0.000706637	0.0617364	0.000318947	0.0185956	0.000906672	0.0257869	5.19414e-05	0.00475729	0.00643693	0.141927	nan	16.2866	nan	11.6034
2,2,4-Trimethylpentane	2,2,4-trimethylpentane	540-84-1	99.2	98.2	14.1	0	0	6.85699e-08	0.00660275	0.0945917	14.1075	1.40625e-06	0.00459835	2.4071	26.5245	0.0828267	4.43547	0.0441835	1.60077	2.37969e-05	0.0318314	2.97885e-06	0.00599398
2,2-Dimethyl-1-Propanol (Neopentyl Alc.)	2,2-dimethyl-1-propanol	75-84-3	113.5	112.5	15.6	6.5	13.5	0.00225597	4.92786	0.0288267	17.566	2.62213e-05	0.322192	0.336253	16.6402	0.0473311	12.2558	0.161437	9.7862	0.0169615	3.73739	0.00732811	1.54584
2,3-Benzofuran (Cumaron)	benzofuran	271-89-6	174	120	18.7	5.1	5.7	5.81637e-06	0.982034	0.0173342	24.6201	0.00482325	4.35093	0.188035	18.6025	1.62205	37.8671	0.478215	14.5678	0.00361452	3.04134	0.000852747	0.929607
2,3-Dichloro-1,3-Butadiene	2,3-dichlorobuta-1,3-diene	1653-19-6	98	97	17.1	2.3	2.8	1.4605e-06	0.0403863	0.0427424	8.51065	0.000921458	0.394959	0.860788	17.563	1.84248	24.226	0.402984	7.0132	0.00153977	0.457447	0.000290143	0.111591
2,3-Dichloropropanol	2,3-dichloro-1-propanol	616-23-9	184	120	17.5	9.2	14.6	0.00253184	6.6312	0.00452283	8.88271	0.000384303	1.21461	0.0213174	3.37264	0.021883	8.37343	0.228921	11.9848	0.506455	7.31928	0.182042	3.21461
2,3-Dichloropropene	2,3-dichloro-1-propene	78-88-6	94	93	16.2	7.8	3	2.23791e-05	0.179998	0.0139984	3.19226	0.0125229	1.91952	0.139458	4.8255	1.39462	22.1208	1.06613	11.5792	0.0147134	1.6788	0.00361301	0.512672
2,4,6-Tribromo Phenol	2,4,6-tribromo-phenol	118-79-6	286	120	20.6	10.2	14.1	0.011011	0.565154	0.00148936	3.06174	0.0543831	1.128	0.00539535	0.921955	0.0474907	6.83512	0.0201443	1.64653	nan	2.2242	nan	0.884224
2,4,6-Trichlorophenol	2,4,6-trichlorophenol	88-06-2	246	120	20.3	5.1	10.8	0.640263	5.79988	0.0146696	17.5786	0.436149	3.46024	0.179179	13.2999	0.414178	21.6186	0.265774	9.64003	nan	14.9546	nan	9.99704
2,4-Dichloroaniline	2,4-dichloroaniline	554-00-7	245	120	20.9	6.2	10	0.000206192	3.21918	0.00848639	12.5998	0.0632571	7.95214	0.0677072	6.65155	0.532573	24.0839	0.461997	12.6932	0.165042	7.69083	0.0471802	3.12129
2,4-Dichlorophenol	2,4-dichlorophenol	120-83-2	210	120	20	7.2	13.1	0.143073	6.13658	0.015238	19.8588	0.160428	4.75772	0.17639	15.1025	0.562759	27.3856	0.32518	12.0853	nan	15.7716	nan	10.0392
2,4-Difluoronitrobenzene	2,4-difluoro-1-nitrobenzene	446-35-5	207	120	19.4	11	3.7	1.56919e-05	1.22629	0.00357644	7.21268	0.000587252	1.05869	0.016797	2.69175	0.112819	14.7197	0.181246	7.98878	0.00214005	1.63023	0.00063087	0.548764
2,4-Dimethylaniline	2,4-dimethylaniline	95-68-1	214	120	19.2	5.2	8.7	0.000401095	3.58529	0.0122325	16.6696	0.0118169	6.72628	0.100131	9.29544	0.412497	27.4125	0.538342	15.4414	0.0136303	4.3586	0.00437534	1.59114
2,4-Dinitrotoluene	1-methyl-2,4-dinitrobenzene	121-14-2	300	120	20	13.1	4.9	9.57768e-06	1.10639	0.00398452	7.02714	0.000262653	0.673442	0.0211439	2.83856	0.421418	21.4678	0.503234	12.4167	0.00111968	1.49338	0.000338567	0.518119
2,5-Dichlorophenol	2,5-dichlorophenol	583-78-8	211	120	20	6.3	12.1	0.192048	6.22718	0.0164227	20.6335	0.260236	5.01559	0.1997	16.1905	0.681959	28.1711	0.346863	12.2307	nan	16.1845	nan	10.4305
2,5-Dimethoxytetrahydrofuran	dimethoxytetrahydrofuran	696-59-3	145.7	120	16.8	7.2	8.2	0.000877441	4.88359	0.0219189	22.0756	0.00171085	2.13121	0.283192	16.7308	1.55737	33.4418	1.93892	21.5318	0.00206388	2.08761	0.000908958	0.818854
2,5-Dimethyl Pyrrole	2,5-dimethylpyrrole	625-84-3		25	18.3	7.6	6.8	0.00026438	0.00026438	0.0166526	0.0166526	0.0188301	0.0188301	0.152678	0.152678	0.58713	0.58713	0.713333	0.713333	0.073676	0.073676	0.0257863	0.0257863
2,6-Dichlorophenol	2,6-dichlorophenol	87-65-0	220	120	20.1	7.5	10.9	0.215829	6.30241	0.0137803	18.7241	0.212772	4.94133	0.150471	13.5582	0.55215	26.9647	0.332453	11.9955	nan	15.6813	nan	10.0791
2,6-Difluorobenzonitrile	2,6-difluorobenzonitrile	1897-52-5		25	18.8	11.2	3.2	1.93223e-05	1.93223e-05	0.00453111	0.00453111	0.0033187	0.0033187	0.0221244	0.0221244	0.113803	0.113803	0.158935	0.158935	0.000780548	0.000780548	0.000231483	0.000231483
2,6-Dimethoxy Phenol	2,6-dimethoxyphenol	91-10-1	261	120	19.3	7.6	13.7	0.000575069	3.24938	0.00528474	8.13887	0.000304327	0.959302	0.0283032	3.24792	0.0820526	12.2056	0.272865	10.1749	0.0219149	2.46908	0.00857212	0.965329
2,6-Dimethyl Phenol	2,6-dimethylphenol	576-26-1	201	120	19.1	4.9	12.9	0.0531485	8.09461	0.0157664	21.0343	0.0480441	6.11571	0.154009	14.2059	0.412659	29.9523	0.353897	14.0016	nan	17.3357	nan	10.6043
2-(Diethylamino)Ethanol	2-(diethylamino)-ethanol	100-37-8	163	120	15.7	5.8	12	0.0420286	10.8067	0.0528863	34.2961	0.00362566	2.94937	1.10485	33.2894	3.89618	41.0741	3.54432	25.5683	0.00596212	2.93396	0.00347813	1.28363
2-Acetyl Thiophene	2-acetothiophene	88-15-3	213.5	120	19.1	12.2	9.3	0.000185972	2.76609	0.00459581	8.15433	0.00133106	2.34264	0.0215128	2.96109	0.231997	22.6856	0.569221	15.3766	0.000823206	1.2034	0.000307918	0.444473
2-Amino Pyridine	2-aminopyridine	504-29-0		25	20.4	8.1	12.2	0.00553422	0.00553422	0.00147949	0.00147949	0.00284545	0.00284545	0.00281831	0.00281831	0.00774872	0.00774872	0.124978	0.124978	0.00423062	0.00423062	0.00148307	0.00148307
2-Bromo Propene	2-bromopropene	557-93-7	48.4	47.4	16.1	6	4.9	9.88213e-07	5.01092e-05	0.0245833	0.170501	0.0120947	0.0880062	0.37168	1.21904	4.04943	9.66337	0.496445	1.3617	0.000795656	0.00761496	0.000154459	0.00162246
2-Bromobutane	2-bromobutane	78-76-2	91.2	90.2	16.3	7.7	4.4	1.32355e-06	0.0201337	0.0397524	5.03052	0.00759047	1.20872	0.820718	12.8521	4.20066	25.6179	0.743845	7.80712	0.000909878	0.25253	0.00018746	0.0641895
2-Bromopropane	2-bromopropane	75-26-3	59.5	58.5	15.5	8.3	4.7	2.19308e-06	0.000550223	0.031718	0.49904	0.0286183	0.444408	0.566213	2.9309	6.00953	16.4078	1.18538	4.21588	0.00144392	0.0355891	0.00032113	0.00881542
2-Bromothiophene	2-bromothiophene	1003-09-4	150	120	20.1	5.2	4.6	5.60215e-07	0.182513	0.00726656	14.2696	0.00266654	2.61143	0.0552993	7.56014	0.919664	29.614	0.188369	8.20438	0.000318344	0.539788	6.11579e-05	0.139065
2-Butanol	2-butanol	78-92-2	99.5	98.5	15.8	5.7	14.5	0.00391744	2.8895	0.0273775	7.01689	3.28045e-05	0.134419	0.291935	8.80014	0.0481406	6.46456	0.178385	6.7012	0.0156547	2.21689	0.00688672	0.938558
2-Butene (Cis)	cis-2-butene	590-18-1	3.7	2.7	14.7	1.3	4.1	nan	1.34769e-08	nan	0.0226028	nan	7.04837e-05	nan	2.00489	nan	2.07819	nan	0.2293	nan	7.08757e-05	nan	1.15886e-05
2-Butene (Trans)	trans-2-butene	624-64-6	0.8	-0.2	14.6	0	2.9	nan	5.08266e-09	nan	0.017483	nan	3.28062e-05	nan	1.82096	nan	1.45946	nan	0.167242	nan	3.90616e-05	nan	6.00126e-06
2-Butynedinitrile	2-butynedinitrile	1071-98-3	76.5	75.5	15.2	16.2	8	1.60966e-06	0.00484833	0.00213228	0.226538	0.00333149	0.480265	0.00499861	0.160438	0.0949914	2.84052	0.122047	1.64361	2.77431e-05	0.00921716	7.32027e-06	0.00271736
2-Chloro Propene (Isopropenyl Chloride)	2-chloro-1-propene	557-98-2	22.6	21.6	15.5	6.7	2.2	nan	1.93023e-06	nan	0.0512041	nan	0.00343024	nan	1.35461	nan	5.62883	nan	1.13527	nan	0.00224752	nan	0.000452316
2-Chloro-2-Methyl Propane	2-chloro-2-methylpropane	507-20-0	50.9	49.9	15.6	7.6	2	3.28389e-06	0.000226216	0.0593798	0.468473	0.00112553	0.0139539	1.27927	4.11667	2.67688	8.19839	1.21797	3.31659	0.00113673	0.0141518	0.000261418	0.00350709
2-Chloro-4-Methylaniline	2-chloro-4-methylbenzenamine	615-65-6	220	120	19.7	7.4	8.9	0.000192324	2.95321	0.0111691	15.7934	0.022092	7.04097	0.0963821	9.16717	0.501446	26.666	0.467753	13.7844	0.0406769	5.64333	0.0120502	2.10159
2-Chloro-5-Methyl Phenol	2-chloro-5-methylphenol	615-74-7	196	120	19	7.7	13.1	0.0226789	4.59258	0.0205965	24.0287	0.0267084	3.88062	0.263272	19.7918	0.598652	30.4679	0.323806	12.8921	nan	13.0939	nan	7.32132
2-Chloroacetamide	2-chloroacetamide	79-07-2	224.5	120	17.6	12.4	12.8	0.000683277	4.67838	0.000150065	0.444486	2.55441e-06	0.0283566	6.46853e-05	0.0295386	8.14589e-06	0.0183753	0.00887093	1.24135	0.000257351	0.201152	8.68612e-05	0.0787232
2-Chlorobutane	2-chlorobutane	78-86-4	68	67	15.8	7.6	2	2.62355e-06	0.00215182	0.0662245	1.78416	0.000902243	0.0521303	1.51968	9.41769	2.70583	14.9479	0.97544	5.12827	0.00112666	0.060363	0.000242689	0.0148888
2-Chlorocyclohexanone	2-chlorocyclohexanone	822-87-7		25	18.5	13	5.1	0.000170552	0.000170552	0.00708674	0.00708674	0.000725937	0.000725937	0.0457355	0.0457355	0.210321	0.210321	1.01816	1.01816	0.00101605	0.00101605	0.000390159	0.000390159
2-Chloroethyl Acetate	2-chloroethanolacetate	542-58-5	145	120	16.7	9.6	8.8	0.000140412	3.34162	0.002785	5.5414	0.000246117	0.876454	0.00952113	1.66907	0.0477669	9.50614	0.526621	14.4859	0.000619854	1.16532	0.000225439	0.437356
2-Chloroethyl Benzene	b-phenylethylchloride	622-24-2	197	120	19.3	6.3	2.2	2.93478e-06	0.717612	0.0194335	23.076	0.00162853	2.41775	0.236966	17.9976	1.0005	30.8254	0.580934	14.344	0.000989314	1.62089	0.000227391	0.477906
2-Chloroethyl Ethyl Ether	2-chloroethylethylether	628-34-2	107	106	16.3	7.9	4.6	0.000256658	1.07342	0.0183757	8.81663	0.00160471	1.32304	0.201218	9.83051	0.899482	26.1928	1.33232	16.9101	0.00196756	1.18462	0.00067764	0.413345
2-Chloroethyl Ethyl Sulfide	2-chloroethylethylsulfide	693-07-2	156.5	120	17.2	5	6.1	5.07881e-06	0.942243	0.0173933	23.2449	0.00247518	3.35721	0.190672	17.2982	1.14014	34.5005	1.0838	19.9147	0.00107377	1.80359	0.000268528	0.552093
2-Chlorophenol	2-chlorophenol	95-57-8	174.9	120	19	5.5	13.9	0.0540875	6.87002	0.0153985	22.5991	0.0768256	6.47026	0.161756	16.8984	0.667016	33.64	0.383463	14.9732	nan	16.7042	nan	10.2783
2-Chlorothiophene	2-chlorothiophene	96-43-5	128.3	120	19.2	6.2	8	1.7981e-06	0.448237	0.020762	28.2749	0.00211677	2.82635	0.262771	24.4697	1.75705	38.4369	0.518656	15.8431	0.00147488	1.6688	0.000293596	0.446621
2-Ethyl Hexyl Acetate	aceticacid-2-ethylhexylester	103-09-3	199	120	15.8	2.9	5.1	8.03802e-05	1.14926	0.0396118	26.9096	0.00020301	0.43617	0.763338	24.6879	0.858603	24.5019	0.617743	11.8596	0.000641722	0.811487	0.000237958	0.271096
2-Ethyl Hexyl Acrylate	2-propenoicacid-2-ethylhexylester	103-11-7	213.5	120	15.3	4.3	3	2.7871e-05	0.719577	0.0373501	25.7981	0.000145344	0.35376	0.704141	23.389	0.666803	22.1459	0.380889	9.39169	0.000495714	0.679344	0.000160815	0.212773
2-Ethyl-1-Butanol	2-ethyl-1-butanol	97-95-0	147	120	15.8	4.3	13.5	0.00145371	5.956	0.0268269	25.4683	1.3121e-05	0.335315	0.309915	18.8494	0.0271036	11.0546	0.0804522	8.19456	0.0209318	4.58851	0.0085198	1.85783
2-Ethyl-1-Butene	2-ethyl-1-butene	760-21-4	64.7	63.7	14.9	1.7	3.5	5.58091e-07	0.000363397	0.122184	2.31409	8.76846e-05	0.00546346	3.4391	14.2481	1.21347	8.0306	0.26117	1.61574	0.00024671	0.0126551	4.14322e-05	0.00251819
2-Ethyl-Hexanol	2-ethyl-1-hexanol	104-76-7	184.6	120	15.9	3.3	11.8	0.000676526	3.23776	0.028973	24.7082	7.9143e-06	0.184196	0.378458	19.346	0.024924	8.57063	0.0620253	6.12281	0.011672	2.73678	0.00463609	1.02999
2-Furonitrile	2-furancarbonitrile	617-90-3	146	120	18.4	15	8.2	5.60128e-05	2.40593	0.00241339	5.78655	0.00262881	4.49048	0.00659177	1.53361	0.0536209	15.7259	0.164052	10.1365	0.00147135	1.62915	0.000465511	0.565955
2-Heptanol	2-heptanol	543-49-7	159	120	15.7	5.4	11.7	0.000924578	3.99967	0.0316917	27.1751	1.17892e-05	0.257166	0.42515	22.0263	0.038169	12.0435	0.0985854	8.28708	0.00613279	2.58255	0.00255087	0.97567
2-Methyl (Cis) Acrylic Acid	(z)-2-butenoicacid	503-64-0	169	120	16.8	5.2	12.4	0.0811194	19.7167	0.00494598	8.01681	0.000302359	1.31203	0.0199782	2.59069	0.0164188	6.50998	0.108356	8.56581	nan	25.1507	14.9275	17.0231
2-Methyl Cyclohexanol (Mix)	2-methylcyclohexanol	583-59-5	164.5	120	17.1	6.5	12.5	0.00130591	5.13051	0.0265102	25.4814	1.14009e-05	0.283005	0.325371	19.7441	0.0295698	11.4963	0.104356	8.90699	0.00678706	2.94841	0.00289536	1.1537
2-Methyl Cyclohexanone	2-methylcyclohexanone	583-60-8	162	120	17.6	7.8	4.7	0.00139921	6.26527	0.0413257	31.8414	0.00338694	3.42657	0.751872	29.6762	3.49265	41.6066	3.02472	26.261	0.00336952	2.89762	0.00159971	1.17653
2-Methyl Pyrazine	2-methylpyrazine	109-08-0	137	120	18.3	12.3	10.5	0.0146858	10.8672	0.0105737	15.3459	0.0212439	11.6282	0.0741659	7.32469	0.92682	37.6643	1.3747	23.2338	0.00263592	2.63104	0.00122508	1.0779
2-Methyl Tetrahydrofuran	2-methyltetrahydrofuran	96-47-9	78	77	16.9	5	4.3	0.00759956	0.540531	0.079373	3.88658	0.00541664	0.391443	1.9674	15.0657	6.95185	28.1476	3.89456	14.6071	0.00633665	0.37183	0.00319757	0.158655
2-Methyl-1,3-Dioxolane	methyldioxolane	497-26-7	81.5	80.5	17.3	4.8	5.8	0.00171573	0.495553	0.0210461	1.67574	0.00541095	0.551966	0.235867	3.39934	2.51211	20.4701	3.77639	16.0761	0.00412075	0.405071	0.00186563	0.171205
2-Methyl-1-Butanol	2-methyl-1-butanol	137-32-6	128	120	16	5.1	14.3	0.00226136	8.35825	0.0251345	25.7271	1.65275e-05	0.457228	0.265593	18.1649	0.0257849	12.2107	0.0948802	9.81822	0.0250568	5.80222	0.0102932	2.43846
2-Methyl-1-Butene	2-methyl-1-butene	563-46-2	31.2	30.2	14.5	1.8	1.3	1.02852e-06	2.74555e-06	0.14455	0.224744	0.000324553	0.000589522	4.26204	5.30847	2.82357	3.69556	0.475184	0.617624	0.000557091	0.00100079	9.90012e-05	0.000181976
2-Methyl-1-Chloro Acrolein	2-chloro-2-butenal	53175-28-3		25	17.1	10.6	7.3	0.000215019	0.000215019	0.0053317	0.0053317	0.00165553	0.00165553	0.0268347	0.0268347	0.284082	0.284082	0.901859	0.901859	0.00147255	0.00147255	0.000554884	0.000554884
2-Methyl-1-Pentanol	2-methyl-1-pentanol	105-30-6	149	120	15.8	4.9	13.5	0.00145292	5.92747	0.0270251	25.6219	1.34293e-05	0.333911	0.313142	19.0383	0.0265122	10.9405	0.0832651	8.35494	0.0204983	4.51973	0.00831134	1.82036
2-Methyl-2-Butanol	2-methyl-2-butanol	75-85-4	102.4	101.4	15.3	6.1	13.3	0.00230261	2.25219	0.0296712	8.73927	2.27074e-05	0.117447	0.351577	11.0162	0.0454688	6.67609	0.143035	6.07066	0.0108355	1.85971	0.00468788	0.754643
2-Methyl-2-Butene	2-methyl-2-butene	513-35-9	38.5	37.5	14.7	2	2.9	7.3748e-07	7.52051e-06	0.147319	0.414351	0.000240439	0.000995509	4.36775	7.2554	2.51242	4.765	0.38281	0.720753	0.000453385	0.0018068	7.61002e-05	0.000322047
2-Methylfuran	2-methylfuran	534-22-5	65	64	17.3	2.8	7.4	8.02236e-06	0.00336876	0.0370594	0.935189	0.00751876	0.238203	0.57513	4.22297	4.72486	19.8045	1.15118	5.4967	0.00461529	0.148122	0.00112504	0.0400312
2-Nitropropane	2-nitropropane	79-46-9	120.2	119.2	16.2	12.1	4.1	2.57901e-05	2.77257	0.0173855	25.6048	0.00144271	3.33841	0.177451	19.8494	2.27301	45.9875	2.42445	29.9281	0.00233721	4.11679	0.000757719	1.50713
2-Nitrothiophene	2-nitrothiophene	609-40-5	224.5	120	19.7	16.2	8.2	2.35158e-05	1.64744	0.00268302	6.06961	0.00116513	1.98748	0.00985677	1.92259	0.355817	26.6804	0.587607	15.9988	0.00198881	1.9107	0.000616241	0.666967
2-Octanol	2-octanol	123-96-6	178.5	120	16.1	4.9	11	0.000631612	2.96096	0.0321303	26.3686	8.82349e-06	0.186006	0.450355	21.6185	0.0351356	10.2246	0.084946	7.05175	0.00455134	1.9874	0.00186346	0.728117
2-Oxopyrrolidinacetamid	piracetam	7491-74-9		25	17.5	15.6	11.2	0.00371342	0.00371342	0.000674971	0.000674971	1.1504e-05	1.1504e-05	0.000863342	0.000863342	0.000394451	0.000394451	0.0999222	0.0999222	0.000110009	0.000110009	5.11386e-05	5.11386e-05
2-Pentanol	2-pentanol	6032-29-7	119.3	118.3	15.6	6.4	13.3	0.00223662	7.12784	0.0297697	25.748	2.30366e-05	0.480292	0.352852	20.9343	0.0454165	15.7507	0.142145	11.3221	0.0118618	4.35451	0.00510223	1.78131
2-Phenoxy Ethanol	2-phenoxyethanol	122-99-6	245	120	17.8	5.7	14.3	0.000836285	4.29047	0.00595583	9.11455	0.00031124	1.17154	0.0322152	3.68213	0.066272	11.8564	0.23912	10.2826	0.0101259	2.73279	0.00388507	1.05983
2-Phenyl Ethanol	2-phenylethanol	60-12-8	218.2	120	18.3	5.6	11.2	0.00187106	6.70169	0.00691763	9.31128	0.000218086	1.07275	0.0379224	3.63828	0.0310442	7.36583	0.137759	8.1519	0.0636428	5.05756	0.0239589	2.12354
2-Propanethiol	2-propanethiol	75-33-2	52.6	51.6	16.3	6.8	6.5	2.35461e-05	0.00126319	0.0694431	0.624944	0.0275565	0.268106	1.50953	5.25031	10.4615	21.9852	3.67452	8.8592	0.00620623	0.0673463	0.0016941	0.0190489
2-Propanol	2-propanol	67-63-0	82.3	81.3	15.8	6.1	16.4	0.00714268	1.36842	0.0186895	1.63348	1.91756e-05	0.0187989	0.14455	2.33005	0.0211934	1.20697	0.152234	2.923	0.0178774	0.983724	0.00786748	0.431013
2-Propyn-1-ol	propynol	107-19-7	113.6	112.6	16.1	8.7	18.8	0.0118838	12.3059	0.000444875	0.862197	9.22357e-05	0.302698	0.000309406	0.105147	0.000172817	0.191372	0.0201226	2.33008	2.87715	9.29735	1.02666	4.04988
2-Pyrrolidone	2-pyrrolidon	616-45-5	245	120	18.2	12	9	0.0497374	21.3793	0.00498524	4.67165	0.000788059	1.46774	0.0203665	1.23769	0.0472206	4.74878	1.05488	16.8398	0.00221567	1.39547	0.00116396	0.678235
2-t-Butyl-4-Methyl Phenol	2-(1,1-dimethylethyl)-4-methylphenol	2409-55-4	237	120	17.3	3.7	10.5	3.93666	12.8496	0.0282677	24.0358	6.59888	9.1708	0.440569	20.3218	0.940219	26.9394	0.345015	10.4642	nan	nan	nan	nan
2-Thiabutane	(methylthio)-ethane	624-89-5	66.7	65.7	16.2	5.9	5.3	3.12174e-05	0.00892777	0.068254	1.6966	0.0202219	0.612756	1.4662	8.92915	9.76522	28.0997	3.5361	12.3556	0.00312519	0.128204	0.000916751	0.03882
2-Toluidine	2-methyl-benzeneamine	95-53-4	200.3	120	19.4	5.8	9.4	0.000336431	4.39072	0.00740052	12.551	0.0194782	8.95531	0.0424986	5.37006	0.264118	26.1283	0.53266	16.1829	0.0166651	5.14442	0.00533685	1.92613
2-Vinyl Toluene	2-vinyltoluene	611-15-4	169.8	120	18.6	1	3.8	1.7615e-06	0.540278	0.0357501	31.662	0.00184513	2.70975	0.5784	28.9369	1.87569	37.6598	0.468544	13.7158	0.000894991	1.58313	0.000187958	0.438011
3,3,3-Trichloro Propene	3,3,3-trichloro-1-propene	2233-00-3	114.5	113.5	17.7	15.5	3.4	1.40644e-06	0.190942	0.0328292	19.677	0.000446612	0.642908	0.608956	23.9177	0.919875	26.4399	0.383577	10.3447	0.00123987	0.936792	0.000236373	0.23892
3,4-Dichloronitrobenzene	3,4-dichloronitrobenzene	99-54-7	255.5	120	20.1	7.2	4.1	6.82817e-06	0.716583	0.0105129	14.3429	0.000582079	0.936626	0.106389	9.27632	0.821581	24.9766	0.464283	11.7933	0.00220536	1.61836	0.000598067	0.516437
3,4-Dichlorotoluene	3,4-dichlorotoluene	95-75-0	208.9	120	19.8	9.8	2.5	1.02086e-06	0.313868	0.032181	27.2782	0.000476241	0.970778	0.583986	25.6101	1.02203	28.3447	0.296561	10.0286	0.000718388	1.04796	0.000136332	0.272095
3,4-Dimethyl Phenol	3,4-dimethylphenol	95-65-8	227	120	19.2	6	13.4	0.441816	16.8002	0.0102234	13.7814	0.0825524	7.13326	0.0737396	6.87006	0.0969634	17.0581	0.169814	10.0938	nan	nan	nan	19.8063
3,4-Dinitrophenol	3,4-dinitrophenol	577-71-9		25	19.5	12.8	14.3	nan	nan	0.00180229	0.00180229	3.41695	3.41695	0.00611822	0.00611822	0.227678	0.227678	0.352347	0.352347	nan	nan	nan	nan
3,4-Epoxy-1-Butene	vinyloxirane	930-22-3	65	64	16.6	7.7	7.4	0.000342258	0.0405417	0.0181552	0.503481	0.0105086	0.34019	0.166076	1.3977	2.67937	15.3715	2.62179	9.82546	0.00361636	0.130127	0.0013875	0.049335
3,5-Dinitrophenol	3,5-dinitrophenol	586-11-8		25	19.5	12.9	14.4	8.43386	8.43386	0.00235527	0.00235527	0.718729	0.718729	0.00930679	0.00930679	0.248178	0.248178	0.352631	0.352631	nan	nan	nan	nan
3-Bromopropyne	3-bromopropyne	106-96-7	89	88	18.1	6.5	5.3	5.78244e-05	0.127021	0.00164229	0.441445	0.233353	5.4612	0.0043878	0.267812	0.224064	8.75707	0.200841	3.43635	0.0523798	1.50474	0.0143314	0.476346
3-Butenenitrile	3-butenenitrile	109-75-1	119	118	16.2	14.3	5.6	0.000197972	4.88897	0.00229816	4.72605	0.0053107	8.15436	0.0051045	1.16636	0.0425995	13.1765	0.430863	16.8322	0.000888386	1.59897	0.000317897	0.600918
3-Chloro-1-Propanol	3-chloro-1-propanol	627-30-5	165	120	17.5	5.7	14.7	0.00378965	10.8835	0.00290585	5.37644	6.95711e-05	0.594699	0.00884112	1.42816	0.00502059	2.57354	0.142607	9.31496	0.122896	5.97809	0.0437638	2.56273
3-Chloro-2-Methyl Propene	3-chloro-2-methyl-1-propene	563-47-3	72	71	16.2	5.6	2	5.53129e-06	0.00660778	0.0389131	1.58167	0.00421619	0.255828	0.646072	6.14545	3.13466	18.7261	1.21348	7.00368	0.00278617	0.170783	0.000640508	0.0451883
3-Chlorobenzylchloride	1-chloro-3-(chloromethyl)benzene	620-20-2	216	120	19.9	9.3	2.6	5.67244e-06	0.89286	0.0125804	17.3771	0.00281487	2.66896	0.127919	11.5861	0.742904	26.4058	0.505206	12.8914	0.00273405	2.20597	0.000634529	0.670187
3-Chloropropionitrile	3-chloropropanenitrile	542-76-7	175	120	17.3	15.9	6.1	7.05314e-05	2.89675	0.000143321	0.664758	8.243e-05	0.497268	6.24798e-05	0.0558929	0.000123474	0.187207	0.0474232	4.03105	0.00011529	0.302027	3.63054e-05	0.109515
3-Chloropropyne	3-chloropropyne	624-65-7	58	57	16.7	7.4	2.3	0.000468253	0.0291805	0.00828278	0.151813	0.54744	3.12906	0.0506664	0.363686	2.0763	9.62207	1.3366	4.99209	0.900588	3.35971	0.271444	1.18701
3-Heptanol	3-heptanol	589-82-2		25	15.9	5.4	11.7	0.000764734	0.000764734	0.0343379	0.0343379	1.3393e-05	1.3393e-05	0.486041	0.486041	0.0426056	0.0426056	0.0921107	0.0921107	0.00773448	0.00773448	0.00309406	0.00309406
3-Hydroxy Tetrahydrofuran	tetrahydro-3-furanol	453-20-3	181	120	18.9	9.4	16.3	0.00552105	12.2717	0.00368506	4.9608	1.07631e-05	0.167316	0.0122015	1.26002	0.00424017	1.50091	0.157571	7.653	0.0043945	2.08121	0.00192067	0.902887
3-Methoxy Butanol	3-methoxy-1-butanol	2517-43-3	161	120	15.3	5.4	13.6	0.0866771	16.9301	0.0360641	29.2071	0.00958008	5.83006	0.584394	25.3884	4.71809	44.4274	5.86154	31.9445	0.0103402	4.52973	0.00597626	2.1461
3-Methoxy-3-Methyl Butanol	3-methoxy-3-methylbutanol	56539-66-3		25	16	6.3	12.9	0.0914776	0.0914776	0.0370238	0.0370238	0.00617507	0.00617507	0.631843	0.631843	3.74246	3.74246	4.77776	4.77776	0.00842249	0.00842249	0.00495995	0.00495995
3-Methoxypropionitrile	3-methoxypropanenitrile	110-67-8	163	120	16.6	14.4	7.8	0.000373436	5.81814	0.00207127	3.55272	0.00163325	3.02253	0.00475038	0.754307	0.0290346	5.51423	0.681061	15.8881	0.000391624	0.798656	0.000160829	0.32227
3-Methyl Cyclohexanol (Mix)	3-methylcyclohexanol	591-23-1	167	120	17.2	6.4	12.5	0.00111586	4.78933	0.0265126	25.7078	8.65271e-06	0.24626	0.323252	19.9828	0.0224529	10.2135	0.0724615	7.64715	0.0125766	3.49365	0.00500211	1.35176
3-Methyl Cyclohexanone	3-methylcyclohexanone	591-24-2	169	120	17.7	7.7	4.7	0.00198649	7.29662	0.037581	30.0488	0.00402544	3.72809	0.642102	27.0344	3.35428	41.246	3.42102	27.2035	0.0037025	3.0182	0.00180982	1.25888
3-Methyl-1,2-Butadiene	3-methyl-1,2-butadiene	598-25-4	40.83	39.83	15.1	2.5	4.5	1.37839e-06	2.06844e-05	0.117675	0.406499	0.00142675	0.00672825	3.14354	6.02264	5.02866	9.55809	0.662682	1.33891	0.0011872	0.00566098	0.000216979	0.00110627
3-Methyl-1-Butene	3-methyl-1-butene	563-45-1	20.1	19.1	14	1.4	3.8	nan	2.06528e-07	nan	0.0889766	nan	9.69119e-05	nan	3.41988	nan	1.5588	nan	0.276829	nan	0.00022665	nan	3.63701e-05
3-Methyl-2-Butanol	3-methyl-2-butanol	598-75-4	112	111	15.6	5.2	13.4	0.00305219	4.81681	0.0318576	16.9251	3.37302e-05	0.318649	0.400729	17.4696	0.0821591	14.7822	0.239051	10.8946	0.00680291	2.65502	0.0031649	1.09747
3-Nitroaniline	3-aminonitrobenzene	99-09-2	306	120	21.4	17.7	10.6	0.000113614	2.76519	0.000892472	2.19338	0.000622715	0.918955	0.00150116	0.416761	0.00559925	2.07057	0.0771302	5.03589	0.00762709	2.07274	0.00240921	0.748459
4,4'-Methylenebis(Phenylisocyanate)	1,1'-methylenebis4-isocyanatobenzene	101-68-8		25	19.5	4.1	1.7	1.07245e-06	1.07245e-06	0.00789065	0.00789065	0.000356879	0.000356879	0.0649269	0.0649269	0.293228	0.293228	0.146457	0.146457	0.00029427	0.00029427	6.75553e-05	6.75553e-05
4-(Trifluoromethyl) Acetophenone	1-[4-(trifluoromethyl)phenyl]ethanone	709-63-7		25	18.8	6.1	3.5	4.30989e-05	4.30989e-05	0.00816778	0.00816778	0.000497917	0.000497917	0.065384	0.065384	0.166792	0.166792	0.200266	0.200266	0.000749258	0.000749258	0.000242689	0.000242689
4-Aminopyridine	4-pyridinamine	504-24-5		25	20.4	16.1	12.9	0.0101221	0.0101221	0.000596105	0.000596105	0.000371273	0.000371273	0.000614172	0.000614172	0.000596821	0.000596821	0.0399815	0.0399815	0.00157225	0.00157225	0.000545807	0.000545807
4-Bromo-1-Butene	4-bromo-1-butene	5162-44-7	98.5	97.5	16.5	6	4.5	1.95047e-06	0.0583574	0.0203341	5.20245	0.0169451	3.00023	0.273935	8.78586	3.30303	27.8944	0.730883	9.41864	0.0011821	0.488107	0.000259253	0.132526
4-Chloro-1,2-Butadiene	4-chloro-1,2-butadiene	25790-55-0		25	16.6	8	6.7	1.06609e-05	1.06609e-05	0.0190921	0.0190921	0.0106339	0.0106339	0.202105	0.202105	2.29748	2.29748	1.11732	1.11732	0.00505113	0.00505113	0.00123109	0.00123109
4-Chloroanisole	4-chloroanisole	623-12-1	197.5	120	19.6	7.8	6.7	6.33252e-06	0.855122	0.0171062	22.0864	0.00180735	2.4308	0.199612	16.9286	1.12817	31.7415	0.526398	13.8883	0.0016235	1.99311	0.000387853	0.598915
4-Chlorobenzaldehyde	4-chlorobenzaldehyde	104-88-1	213.5	120	19.9	7.2	5.6	7.62743e-05	2.05292	0.00789184	12.4235	0.0012043	2.06139	0.0558488	6.14032	0.40179	25.3173	0.47527	13.6521	0.00144709	1.69554	0.000486963	0.596621
4-Chlorobenzonitrile	4-chlorobenzonitrile	623-03-0	223	120	19.5	8	4.1	3.99943e-05	1.63359	0.00434631	7.64226	0.00301145	3.63599	0.0201715	2.7412	0.12551	16.2611	0.246429	9.98924	0.00112262	1.24204	0.00035003	0.422797
4-Chlorobenzyl Alcohol	p-chlorobenzylalcohol	873-76-7	235	120	19.6	7.5	13	0.00161851	5.5347	0.00576872	8.57108	0.00027886	1.10841	0.0314144	3.39696	0.0340067	7.95834	0.123081	7.69839	0.124505	5.5152	0.0447812	2.32178
4-Chlorothiophenol	4-chlorobenzenethiol	106-54-7	206	120	20.8	8.6	10.6	2.54698e-05	1.21367	0.00879686	14.3388	0.0168778	4.85132	0.0674458	7.53842	0.80111	28.869	0.545553	14.0128	0.027413	3.55695	0.00707662	1.14489
4-Ethyl Morpholine	n-ethyl-morpholine	100-74-3	138.5	120	17.7	5	6.6	0.0243326	8.13717	0.0421252	32.3431	0.00268694	3.06413	0.76985	30.404	2.50171	39.5543	2.23788	23.686	0.00366934	2.67197	0.00181891	1.06602
4-Ethyl Phenol	4-ethylphenol	123-07-9	217.9	120	18.3	5.2	12.6	0.768901	18.1795	0.0111659	14.6111	0.145059	8.04816	0.0852386	7.62366	0.1098	18.1123	0.171377	10.2594	nan	nan	nan	21.6997
4-Ethyl-1,3-Dioxolane-2-One	butylenecarbonate	4437-85-8		25	17.5	9.8	3	0.000182404	0.000182404	0.00265988	0.00265988	0.000220295	0.000220295	0.0086424	0.0086424	0.052018	0.052018	0.659544	0.659544	0.000522701	0.000522701	0.00020729	0.00020729
4-Fluoro-3-Nitrobenzofluoride	1,4-difluoro-2-nitrobenzene	364-74-9	206.5	120	19.4	7.2	3.7	1.32842e-05	1.18042	0.00385103	7.75027	0.000671256	1.14134	0.0190786	3.00623	0.14412	16.4378	0.195022	8.29262	0.00236426	1.77356	0.000674513	0.590278
4-Hydroxy Benzaldehyde	4-hydroxybenzaldehyde	123-08-0	310	120	19.4	15.2	14.5	0.0191272	11.0768	0.00100439	1.75234	2.5458e-05	0.151214	0.00163256	0.27698	0.00092634	0.373435	0.0241578	2.02778	8.26116	10.2721	5.01868	5.11486
4-Methoxy Acetophenone	4-methoxyacetophenone	100-06-1	258	120	18.9	11.2	7	0.000310054	2.99944	0.00688063	9.64938	0.000964984	1.50931	0.0435973	4.23038	0.302991	19.5669	0.617498	13.365	0.000910339	1.19866	0.000359794	0.452423
4-Methoxy Benzonitrile	4-methoxybenzonitrile	874-90-8	256.5	120	19.4	16.7	5.4	6.23043e-05	1.95375	0.00332015	5.77617	0.00178817	2.63153	0.0124199	1.77692	0.0915621	12.1083	0.310946	10.1723	0.000461162	0.83055	0.000159887	0.297658
4-Nitrophenol	4-nitrophenol	100-02-7	279	120	20	14.5	14.2	1.84026	20.0085	0.0010456	1.99592	0.00660932	1.11069	0.00199073	0.372877	0.00503795	1.48059	0.0546051	3.84467	nan	nan	nan	21.0731
4-Pentenal	4-pentenal	2100-17-6		25	15.5	8.1	6.8	0.000297706	0.000297706	0.014725	0.014725	0.00405144	0.00405144	0.122546	0.122546	1.27802	1.27802	2.00972	2.00972	0.00226876	0.00226876	0.000889377	0.000889377
4-Vinyl Pyridine	4-vinylpyridine	100-43-6	121	120	18.1	7.2	6.8	0.021759	7.78758	0.0116975	16.6774	0.0086033	7.05682	0.0893485	8.69253	0.771143	34.1402	0.821285	18.1575	0.00282775	2.35717	0.00122663	0.905917
9,10-Anthraquinone	anthraquinone	84-65-1	377	120	20.3	7.6	4.8	1.62477e-05	0.859713	0.00572871	8.03331	0.000412152	0.740082	0.0371853	3.53047	0.270005	15.5598	0.232656	7.29014	0.000400641	0.656196	0.00012993	0.222506
9,10-Phenanthrenequinone	9,10-phenanthrenedione	84-11-7		25	20.3	17.1	4.8	0.000140941	0.000140941	0.00285129	0.00285129	0.000279389	0.000279389	0.0116942	0.0116942	0.07585	0.07585	0.178247	0.178247	0.000340459	0.000340459	0.000126893	0.000126893
a-Methyl Styrene	alpha-methylstyrene	98-83-9	165.4	120	18.5	2.4	2.4	1.67719e-06	0.521959	0.0366157	31.9404	0.0017238	2.59486	0.600726	29.3437	1.86949	37.613	0.446594	13.4234	0.000883465	1.55962	0.000183345	0.428514
Acetaldehyde	acetaldehyde	75-07-0	20.1	19.1	14.7	12.5	7.9	nan	0.00235832	nan	0.0107008	nan	0.0620108	nan	0.112583	nan	7.48039	nan	10.3726	nan	0.00702125	nan	0.00342247
Acetaldoxime	acetaldehydeoxime	107-29-9	115	114	16.3	4	20.2	0.0262089	17.466	0.00256125	3.31366	0.000183285	1.06108	0.00572855	0.846353	0.00276375	1.65479	0.0805688	6.35353	6.02059	17.6075	2.78713	9.63345
Acetamide	acetamide	60-35-5	222	120	17.3	18.7	19.3	0.00479143	9.45032	0.0002566	0.440985	8.91213e-07	0.0123889	0.000118993	0.0233739	5.39394e-06	0.007596	0.00925557	1.0628	4.73449e-05	0.0630055	1.91249e-05	0.0274594
Acetanilide	acetanilide	103-84-4	304	120	20.6	14.4	13.5	0.000600023	4.16973	0.00265458	4.25344	0.00041422	1.05553	0.00844556	1.12645	0.0180163	3.96854	0.126245	6.46103	0.00251492	1.41769	0.000943203	0.544779
Acetic Acid	aceticacid	64-19-7	117.9	116.9	14.5	8	13.5	0.0535557	20.5549	0.00137014	1.97886	9.03758e-06	0.103389	0.00216931	0.330738	0.00129936	0.56794	0.0891618	5.19309	13.0521	17.0922	7.88759	9.32878
Acetic Anhydride	aceticanhydride	108-24-7	139.5	120	16	11.7	10.2	0.000132791	4.37677	0.00455823	6.85155	0.000848375	1.62765	0.0203944	2.31219	0.370851	22.9853	1.61385	22.3132	0.000844511	1.547	0.000347633	0.625742
Acetone	propanone	67-64-1	56	55	15.5	10.4	7	0.0103445	0.225191	0.0277689	0.336457	0.0677364	0.745048	0.318495	1.3657	9.16065	21.3194	10.871	19.8281	0.0145867	0.185387	0.00755658	0.0923072
Acetonecyanhydrin	2-hydroxy-2-methylpropanenitrile	75-86-5	171	120	16.6	12.2	15.5	0.0146923	13.3956	0.00146547	2.64734	0.00028575	1.04467	0.00256725	0.457391	0.0019078	0.931948	0.105541	6.14132	2.90423	7.52516	1.13649	3.39369
Acetonitrile	acetonitrile	75-05-8	81.6	80.6	15.3	18	6.1	0.000514028	0.331276	0.000883659	0.121515	0.00312279	0.469245	0.000900364	0.0314919	0.0111973	0.416226	0.654436	5.77067	0.000164434	0.0325741	6.86629e-05	0.0137937
Acetophenone	acetophenone	98-86-2	202	120	18.8	9	4	0.000226071	3.18725	0.0107441	15.2278	0.00232835	3.101	0.0841661	8.06225	0.764826	31.2233	0.830835	17.1908	0.00131153	1.79541	0.000501904	0.665212
Acetoxime	2-propanoneoxime	127-06-0	136	120	16.3	3.7	10.9	0.0153512	17.591	0.00746124	11.3584	0.000262858	1.92025	0.0353187	4.12034	0.014983	7.03719	0.132454	10.295	3.32965	17.0875	1.44041	9.44596
Acetyl Salicylic Acid	aspirin	50-78-2		25	19	6.9	9.7	0.0250146	0.0250146	0.00197463	0.00197463	0.000137235	0.000137235	0.00593721	0.00593721	0.00947814	0.00947814	0.0754309	0.0754309	nan	nan	7.69505	7.69505
Acetylacetone	acetylacetone	123-54-6	138	120	16.1	10	6.2	0.000527757	6.62643	0.00654888	8.23833	0.00149947	2.02435	0.0352179	3.02385	0.480787	22.9839	2.09437	23.661	0.00122027	1.66764	0.000546481	0.701477
Acetylbromide	acetylbromide	506-96-7	76	75	16.7	10.6	5.2	5.28542e-06	0.00939152	0.00261629	0.247831	0.0108837	0.698993	0.010179	0.28017	0.635573	10.4561	0.442158	3.99749	0.00156692	0.136068	0.00039067	0.0390685
Acetylchloride	acetylchloride	75-36-5	50.7	49.7	16.2	11.2	5.8	2.65715e-05	0.00139706	0.00896613	0.0922531	0.00530132	0.0607117	0.0619907	0.312118	1.63065	6.63819	1.7749	4.94337	0.00827211	0.083303	0.00222206	0.0240183
Acetylene (Ethyne)	ethine	74-86-2	-28.1	-29.1	14.4	4.2	11.9	nan	8.04252e-07	nan	8.19368e-06	nan	2.27045	nan	0.000237315	nan	0.130977	nan	0.0860479	nan	9.93125	nan	4.40107
Acetylfluoride	acetylfluoride	557-99-3		25	14.7	14	5.7	4.30406e-05	4.30406e-05	0.00330199	0.00330199	0.00144559	0.00144559	0.0107706	0.0107706	0.185515	0.185515	0.930424	0.930424	0.00132466	0.00132466	0.000427635	0.000427635
Acridine	acridine	260-94-6	345.5	120	20	5.9	2	0.000679159	1.50638	0.00959992	12.281	0.00198925	2.15085	0.0793598	6.50154	0.407575	19.9575	0.277802	8.39035	0.000865387	0.973763	0.00028278	0.317402
Acrolein	acrolein	107-02-8	52.6	51.6	15.5	10	8.6	0.00127823	0.0325267	0.00887221	0.0988706	0.0122207	0.14679	0.0479901	0.236704	1.50456	6.2996	3.08176	7.95274	0.00340237	0.043692	0.00149555	0.0190009
Acrylamide	2-propenamide	79-06-1	192.6	120	15.8	12.1	12.8	0.00138634	5.95617	0.000162487	0.415427	1.7461e-06	0.0213753	6.09466e-05	0.0225312	4.81045e-06	0.010312	0.00481858	0.794437	0.000107874	0.115506	3.81731e-05	0.0464978
Acrylic Acid	acrylicacid	79-10-7	141.2	120	16.6	6.4	10	0.124938	24.2038	0.00211974	3.97695	8.25641e-05	0.593448	0.0046944	0.838094	0.00363197	2.06515	0.0625383	5.93208	nan	27.8242	nan	18.99
Acrylonitrile	2-propenenitrile	107-13-1	77.3	76.3	16	12.8	6.8	0.000195148	0.121831	0.00196222	0.213633	0.00762969	0.910858	0.00367951	0.117737	0.0450954	1.72032	0.415015	4.62186	0.000689378	0.085937	0.000251851	0.0326256
Acrylylchloride	propenoylchloride	814-68-6	72	71	16.2	11.6	5.4	1.90275e-05	0.015707	0.0149594	0.748961	0.00706626	0.378455	0.147136	1.94637	3.05311	19.2128	1.33314	7.82911	0.00901346	0.392758	0.00242123	0.117989
Adenine	adenine	73-24-5		25	20	16	14.9	0.000889704	0.000889704	3.31318e-05	3.31318e-05	6.83279e-06	6.83279e-06	5.78253e-06	5.78253e-06	6.26078e-07	6.26078e-07	0.0010119	0.0010119	0.000137663	0.000137663	4.34842e-05	4.34842e-05
Adipic Acid (1,6-Hexanedioic)	hexanedioicacid	124-04-9	337.5	120	17.1	10	16.3	0.0239939	10.2829	0.000629696	0.995572	6.58368e-07	0.00930161	0.000778253	0.120391	8.84548e-05	0.0520817	0.0189885	1.33966	9.15538	5.97678	5.10716	2.6759
Allyl Acetate	aceticacid-2-propenylester	591-87-7	103.5	102.5	15.7	4.5	8	0.000325167	1.22305	0.0155726	5.81252	0.00313881	1.50972	0.145501	5.94218	1.68285	28.7139	1.98115	18.3152	0.00228361	1.06077	0.000938528	0.415736
Allyl Acetic Acid	4-pentenoicacid	591-80-0	83	82	16.7	4.7	11.3	0.0753436	2.95894	0.00515197	0.546204	0.000263575	0.058118	0.0219747	0.451741	0.0157739	0.621056	0.135086	1.97212	nan	16.8344	14.069	11.554
Allyl Acetoacetate	3-oxobutanoicacid-2-propenylester	1118-84-9	196	120	15.9	6.9	8.6	0.000107005	2.67593	0.00260458	4.17917	0.000202988	0.525083	0.00852366	1.15095	0.0445823	6.00243	0.493071	11.5557	0.000352886	0.671489	0.000138481	0.261564
Allyl Alcohol	2-propen-1-ol	107-18-6	97	96	16.2	10.8	16.8	0.00753313	4.39715	0.0101287	2.82221	0.000127127	0.272151	0.0533421	2.11603	0.0282615	3.64272	0.188675	6.30196	0.101029	4.61656	0.0395303	2.06602
Allyl Amine	2-propen-1-amine	107-11-9	53.3	52.3	15.5	5.7	10.6	6.95114	10.5396	0.0247973	0.261848	0.0370646	0.50704	0.237021	1.02593	1.5219	7.40166	3.21457	9.07623	0.0415945	0.312266	0.0216898	0.160887
Allyl Bromide (3-Bromoprene)	3-bromopropene	106-95-6	70.1	69.1	16.5	7.3	4.9	3.16003e-06	0.00306611	0.00952586	0.418083	0.0386226	1.14541	0.0781592	0.967843	2.13481	14.0125	0.7025	4.12855	0.00140842	0.0799291	0.000329461	0.0213452
Allyl Chloride	3-chloropropene	107-05-1	45.1	44.1	17	6.2	2.3	1.12892e-05	0.000288555	0.0240114	0.1369	0.0109707	0.0701867	0.285428	0.882939	3.26887	8.40853	1.7603	3.89525	0.00448895	0.0301441	0.00110777	0.0078948
Allyl Cyanide	3-butenenitrile	109-75-1	119	118	16	14.3	5.6	0.000197972	4.88897	0.00229816	4.72605	0.0053107	8.15436	0.0051045	1.16636	0.0425995	13.1765	0.430863	16.8322	0.000888386	1.59897	0.000317897	0.600918
Allyl Ethylether	allylethylether	557-31-3	67.6	66.6	15	4.8	5.1	0.00106606	0.0658962	0.0599113	1.57375	0.0046669	0.174586	1.21041	7.53053	5.11985	20.4278	2.28023	8.66217	0.00371843	0.129301	0.00150213	0.0480439
Allyl Fluoride	allylfluoride	818-92-8	-3	-4	14.9	6.4	1	nan	7.1128e-08	nan	0.00120791	nan	0.000708745	nan	0.0431219	nan	0.810412	nan	0.610373	nan	0.000106432	nan	2.91179e-05
Allyl Formate	allylformate	1838-59-1	80	79	15.7	5.4	8.8	0.000177464	0.127789	0.00760976	0.721694	0.00177217	0.241768	0.0427253	0.897826	0.50888	9.37415	1.13368	8.52155	0.0022017	0.236346	0.000825144	0.0896648
Allyl Isothiocyanate	isothiocyanatopropene	57-06-7	152	120	17	11.3	8.5	4.20905e-06	0.943402	0.0113309	20.4744	0.0163839	9.02794	0.0857381	11.6729	1.6226	42.0044	0.779874	19.9517	0.00171464	2.42728	0.000389609	0.716545
Allyl Mercaptan	allylthiol	870-23-5	67	66	16.4	6.2	7.9	2.20829e-05	0.0085571	0.0292098	0.897142	0.0510372	1.28575	0.365543	3.19776	7.01965	25.7021	3.19526	12.1589	0.00751325	0.238367	0.00204715	0.0700531
Allyl Methacrylate	2-methyl-2-propenoicacid2-propenylester	96-05-9		25	15.2	4.1	7.5	8.13833e-05	8.13833e-05	0.0239822	0.0239822	0.00156041	0.00156041	0.31366	0.31366	1.69476	1.69476	0.968869	0.968869	0.00151108	0.00151108	0.000536904	0.000536904
Allyl Methyl Ether	3-methoxy-1-propene	627-40-7		25	15	4.3	5.9	0.00237881	0.00237881	0.0525543	0.0525543	0.0161006	0.0161006	0.938595	0.938595	7.90905	7.90905	4.04539	4.04539	0.00707473	0.00707473	0.00307124	0.00307124
Allylacetonitrile (4-Pentenenitrile)	4-pentenenitrile	592-51-8	147	120	16.3	11.2	5	0.000264159	5.61361	0.00433408	7.47626	0.00768699	8.46998	0.0154896	2.23664	0.144646	20.1649	1.01487	21.4525	0.000868588	1.6512	0.000336486	0.639182
Alpha,Alpha,A-Trifluoro Toluene	trifluoromethylbenzene	98-08-8	102.1	101.1	17.5	8.8	0	1.59353e-06	0.0671644	0.0227644	6.99628	0.000954029	0.506458	0.327046	10.8399	0.576544	15.8283	0.166735	4.03054	0.000900535	0.420773	0.00017621	0.107174
Ammonia	nh3	7664-41-7	-33.35	-34.35	13.7	16.7	18.8	nan	nan	nan	0.00251085	nan	nan	nan	2.95137	nan	nan	nan	27.8797	nan	8.88221	nan	6.30851
Amyl Acetate	n-pentylacetate	628-63-7	149.2	120	15.8	3.3	6.1	0.000250983	2.75461	0.0377319	29.1358	0.000876547	1.40479	0.661078	26.5035	1.95035	35.5678	1.46234	19.8774	0.00171057	1.82362	0.000702802	0.67014
Anethole (Trans)	1-methoxy-4-(1-propenyl)-benzene	104-46-1	235	120	18.5	4.3	6	4.62841e-06	0.660602	0.0221972	22.9966	0.00112012	1.69197	0.289805	18.1161	1.01529	29.4428	0.459516	12.071	0.000824512	1.30332	0.000200387	0.38514
Aniline	aniline	62-53-3	184.1	120	20.1	5.8	11.2	0.000588688	6.23212	0.0033064	7.12671	0.0205867	10.0172	0.010834	2.09534	0.0786723	17.2596	0.383171	14.908	0.0184308	5.62755	0.00592694	2.14515
Anisaldehyde (2-Methoxy Benzaldehyde)	2-methoxybenzaldehyde	135-02-4	243.5	120	19.4	11.9	8.3	0.000164186	2.60681	0.00812794	11.9718	0.00120935	1.9529	0.0562181	5.72729	0.487742	25.8585	0.624756	14.5203	0.00105009	1.46066	0.00039337	0.536847
Anisidine (2-Methoxyaniline)	o-anisidine	90-04-0	224	120	19.5	5.4	11.4	0.0002736	3.19897	0.00468487	8.45284	0.00404595	4.17096	0.0212406	3.04904	0.113417	16.5236	0.388389	12.7879	0.00429592	2.59142	0.00141106	0.930718
Anisole	anisole	100-66-3	153.7	120	17.8	4.4	6.9	1.03692e-05	1.24421	0.0197954	26.5359	0.00307249	4.18038	0.221887	20.603	1.63593	39.6741	0.766998	18.1989	0.00141457	2.38932	0.000370758	0.748556
Ascorbic Acid	ascorbicacid	50-81-7		25	18	11.7	25.5	0.0179331	0.0179331	5.67381e-05	5.67381e-05	4.85513e-08	4.85513e-08	1.64293e-05	1.64293e-05	1.04065e-06	1.04065e-06	0.00231652	0.00231652	11.2939	11.2939	7.15669	7.15669
Benzal Chloride (Alpha,A-Dichlorobenzene)	(dichloromethyl)-benzene	98-87-3	205	120	19	7.6	2.4	1.14166e-05	1.02228	0.0154222	19.5491	0.00575186	3.25901	0.178471	14.3736	0.978095	28.068	0.495214	12.736	0.010744	3.14905	0.00260495	0.988439
Benzaldehyde	benzaldehyde	100-52-7	179	120	19.4	7.4	5.3	0.000144767	3.22941	0.00834259	13.8968	0.00247883	3.69155	0.0537806	6.45446	0.641255	33.1855	0.750131	17.9374	0.00121068	1.96151	0.000445624	0.721477
Benzamide	benzamide	55-21-0	290	120	21.2	14.7	11.2	0.000978458	4.80079	0.000676361	1.31887	4.93458e-05	0.224081	0.000823329	0.174947	0.000444546	0.268678	0.02317	2.21405	0.000830255	0.525678	0.000299658	0.205597
Benzene	benzene	71-43-2	80	79	18.4	0	2	3.81227e-06	0.0144562	0.0432755	3.05416	0.00923744	0.914112	0.714442	9.62522	5.25521	29.3117	0.98659	8.12129	0.00232024	0.295697	0.000509304	0.0773066
Benzimidazole	1h-benzimidazole	51-17-2	360	120	20.6	14.9	11	0.0019266	5.77749	0.0006838	1.30087	0.000275008	0.618255	0.000855536	0.170886	0.00091815	0.353875	0.0282825	2.24045	0.00317613	0.994937	0.00106826	0.376556
Benzisoxazole	benzisoxazole	271-58-9	215	120	20.6	11.5	8.8	0.000233294	2.87904	0.00353518	6.8333	0.00193977	3.16961	0.0136127	2.16779	0.089217	15.6864	0.217449	10.0878	0.00196617	1.67931	0.000660216	0.596564
Benzoic Acid	benzoicacid	65-85-0	249.2	120	20	6.9	10.8	0.089134	14.5604	0.00398685	6.24533	0.000699562	1.40659	0.0160351	1.96945	0.0174394	5.40952	0.0652394	5.55663	nan	21.7583	nan	14.761
Benzoin	benzoin	119-53-9	344	120	19.9	9.7	10.7	9.74905e-05	1.34269	0.0048155	6.9843	0.000400015	0.728305	0.0270404	2.81832	0.115386	10.6981	0.224932	7.3446	0.000916756	0.840541	0.000312626	0.291947
Benzonitrile	benzonitrile	100-47-0	191.1	120	18.8	12	3.3	5.32033e-05	2.2256	0.00468749	8.69502	0.00568838	6.372	0.019926	2.96229	0.204201	23.8133	0.383013	13.3604	0.000621	1.23637	0.000208464	0.434323
Benzophenone	benzophenone	119-61-9	305.4	120	19.5	7.2	5.1	3.74882e-05	1.09957	0.00857774	11.091	0.000850034	1.25127	0.0665627	5.59856	0.383693	19.1117	0.318249	8.92142	0.000559962	0.840352	0.000182829	0.282329
Benzothiazole	benzothiazole	95-16-9	231	120	20.6	5.2	8.4	0.000186608	1.66713	0.00566181	9.9934	0.00288628	3.61667	0.0308733	3.99516	0.305243	24.6142	0.343695	12.0594	0.00111599	1.19314	0.000354223	0.395716
Benzotrichloride	(trichloromethyl)-benzene	98-07-7	221	120	19.4	3.2	3.2	7.30971e-07	0.241322	0.0228679	21.8795	0.000276179	0.624697	0.363218	19.0861	0.60701	22.0552	0.243323	8.25136	0.000432775	0.716453	8.11934e-05	0.185093
Benzoyl Chloride	benzoylchloride	98-88-4	197.2	120	19.3	6.8	4.5	3.28315e-06	0.695871	0.0162885	21.8749	0.00132316	2.08657	0.187693	16.6627	1.47886	33.7004	0.485612	13.7124	0.00130982	1.82162	0.000311238	0.545598
Benzyl Acetate	aceticacidphenylmethylester	140-11-4	213	120	18.3	5.7	6	9.96993e-05	2.11505	0.00852949	11.4281	0.00101466	1.56951	0.0618496	5.56868	0.438866	22.434	0.695086	14.026	0.000815957	1.20819	0.000300703	0.439007
Benzyl Alcohol	benzylalcohol	100-51-6	205.3	120	18.4	6.3	13.7	0.00201156	7.37355	0.00624607	9.51353	0.000299973	1.4896	0.0311381	3.5663	0.0363449	9.74259	0.154825	9.53021	0.0632013	5.52613	0.0237341	2.32921
Benzyl Amine	benzylamine	100-46-9	185	120	19	4.6	9.4	1.63784	17.7306	0.0117587	15.5189	0.00720975	7.14867	0.0888313	7.90364	0.446256	29.6706	1.01589	20.4819	0.00737046	3.32557	0.00359053	1.42414
Benzyl Benzoate	benzoicacidphenylmethylester	120-51-4	323.5	120	20	5.1	5.2	1.38964e-05	0.733461	0.00905274	10.9484	0.000590839	0.900674	0.0763859	5.86179	0.351951	16.7771	0.27851	7.81165	0.0004984	0.74282	0.000147547	0.238915
Benzyl Butyl Phthalate	butylbenzylphthalate	85-68-7		25	19	11.2	3.1	1.7802e-05	1.7802e-05	0.00775652	0.00775652	0.000257057	0.000257057	0.0676951	0.0676951	0.210696	0.210696	0.251003	0.251003	0.000370423	0.000370423	0.000119316	0.000119316
Benzyl Chloride	(chloromethyl)-benzene	100-44-7	179	120	18.8	7.1	2.6	5.32484e-06	1.0938	0.0126567	19.8901	0.00332503	3.99708	0.115758	12.9049	0.868902	32.6051	0.639939	16.0835	0.00160454	2.29651	0.000387775	0.709759
Benzyl Ethyl Ether	(ethoxymethyl)-benzene	539-30-0	186	120	18.4	3.8	3.8	0.000291796	2.08062	0.0257761	24.4901	0.00171163	2.24423	0.359752	19.8603	1.38062	32.6983	0.843314	15.9391	0.00137275	1.60752	0.000489218	0.546384
Bicyclohexyl	bicyclohexyl	92-51-3	238	120	17	0	0	4.42378e-08	0.0476267	0.0635767	32.6986	4.17291e-07	0.0109322	1.49469	31.9393	0.0317458	4.94389	0.0253025	2.23268	1.12823e-05	0.0823321	1.39903e-06	0.0167083
Biphenyl	biphenyl	92-52-4	256.1	120	19.7	1	2	1.61294e-06	0.463941	0.0181392	20.4815	0.00153129	2.04176	0.211996	14.8225	0.91549	27.9543	0.305493	9.69342	0.000639391	1.11333	0.00013799	0.314269
Bis(Chloromethyl)Ether	oxybischloromethane	542-88-1	106	105	17.2	8.2	7.6	7.73079e-05	1.07292	0.00798338	4.82542	0.0140424	3.29656	0.0573447	4.12393	0.689264	23.6724	1.04807	15.2784	0.0594101	5.2034	0.0157434	1.90423
Bisphenol A	4,4'-(1-methylethylidene)bisphenol	80-05-7		25	19.2	5.9	13.8	0.560342	0.560342	0.00301532	0.00301532	0.0281024	0.0281024	0.0122112	0.0122112	0.00865077	0.00865077	0.0485879	0.0485879	nan	nan	nan	nan
Biuret	imidodicarbonicdiamide	108-19-0		25	20	14.6	18.8	4.51896e-05	4.51896e-05	1.01486e-06	1.01486e-06	8.91549e-11	8.91549e-11	1.49181e-08	1.49181e-08	7.35994e-12	7.35994e-12	7.54539e-06	7.54539e-06	3.98282e-07	3.98282e-07	1.17555e-07	1.17555e-07
Boron Trichloride	bcl3	10294-34-5	12.5	11.5	16.6	2.5	0	nan	4.04426e-09	nan	0.0127322	nan	5.85501e-07	nan	0.459874	nan	0.066295	nan	0.0677238	nan	5.95977e-06	nan	7.41699e-07
Bromine	br2	7726-95-6	58.8	57.8	18.2	14.9	0	1.47684e-08	7.04582e-06	0.0023951	0.0527876	0.000301207	0.0103442	0.0106004	0.0980118	0.384947	3.24382	0.0222164	0.162112	4.32144e-06	0.000240873	5.91795e-07	4.01956e-05
Bromobenzene	bromobenzene	108-86-1	156	120	19.2	5.5	4.1	7.18714e-07	0.257154	0.0106064	17.5888	0.00282695	3.02421	0.0987943	11.3524	0.878754	29.5544	0.180163	7.79862	0.000357459	0.7471	6.99648e-05	0.197083
Bromochloromethane	ch2clbr	74-97-5	68	67	17.3	5.7	3.5	5.6653e-05	0.0150825	0.00600058	0.241961	0.561972	3.92116	0.0421809	0.521209	2.83409	14.2881	0.772444	4.25715	0.117363	1.15955	0.0295056	0.342998
Bromoethylene	bromoethene	593-60-2	15.8	14.8	15.9	6.3	5.4	nan	3.8808e-07	nan	0.00458818	nan	0.0259156	nan	0.065655	nan	2.37305	nan	0.282627	nan	0.00101615	nan	0.000203279
Bromoform	chbr3	75-25-2	149.1	120	20	5	7	5.42554e-06	0.163016	0.00125811	3.51993	0.055068	3.78941	0.00413314	0.973206	0.215452	18.2357	0.0338036	2.5066	0.0103302	0.599344	0.00246297	0.165088
Bromomethyl Methyl Ether	bromomethylmethylether	13057-17-5	87	86	16.9	8.5	7	9.01271e-06	0.0451579	0.00155792	0.368122	0.00777908	1.17504	0.00407916	0.233859	0.105344	5.46109	0.368419	4.92298	0.000718189	0.169357	0.00020232	0.0537398
Bromotrichloro Methane #1	bromotrichloromethane	75-62-7	105	104	18.3	0.8	0	3.46375e-08	0.00680931	0.0147511	5.90815	8.13382e-06	0.0260008	0.193645	8.28736	0.122591	7.83079	0.0571783	2.2287	1.22256e-05	0.0282535	1.68201e-06	0.00577539
Bromotrichloro Methane #2-Gc	bromotrichloromethane	75-62-7	105	104	18.3	8.1	6	3.46375e-08	0.00680931	0.0147511	5.90815	8.13382e-06	0.0260008	0.193645	8.28736	0.122591	7.83079	0.0571783	2.2287	1.22256e-05	0.0282535	1.68201e-06	0.00577539
Bromotrichloro Methane #3	bromotrichloromethane	75-62-7	105	104	18.3	8.1	0	3.46375e-08	0.00680931	0.0147511	5.90815	8.13382e-06	0.0260008	0.193645	8.28736	0.122591	7.83079	0.0571783	2.2287	1.22256e-05	0.0282535	1.68201e-06	0.00577539
Bromotrifluoromethane (Freon 1381)	cf3br	75-63-8	-57.8	-58.8	14.3	2.4	0	nan	3.57089e-19	nan	8.0861e-07	nan	1.8326e-10	nan	0.00152511	nan	0.00124985	nan	2.66478e-05	nan	8.98507e-12	nan	6.43411e-13
Butadiene-4-Cyano	2,4-pentadienenitrile	1615-70-9		25	16.2	11.7	5.2	0.000162856	0.000162856	0.00418465	0.00418465	0.00825987	0.00825987	0.0145224	0.0145224	0.143586	0.143586	0.51883	0.51883	0.00107012	0.00107012	0.000387475	0.000387475
Butadienedioxide	1,3-butadienediepoxide	1464-53-5	138	120	18.3	14.4	6.2	0.000274325	5.80218	0.00390436	6.75945	0.0010978	2.26112	0.0145367	2.0574	0.189784	20.965	1.38064	22.7471	0.000718233	1.5945	0.000295983	0.640637
Butadione	butadione	431-03-8	88	87	15.7	5.1	6.8	0.000146849	0.280508	0.00820761	1.24465	0.00170299	0.369207	0.050004	1.29164	1.0204	15.7861	2.23035	14.413	0.00150922	0.335129	0.000602418	0.13313
Butane	butane	106-97-8	-0.5	-1.5	14.1	0	0	nan	2.49851e-10	nan	0.0176015	nan	1.2818e-07	nan	2.00996	nan	0.0755956	nan	0.0173834	nan	1.71469e-06	nan	1.67331e-07
Butyl Benzoate	benzoicacidbutylester	136-60-7	250.3	120	18.3	5.6	5.5	2.69782e-05	0.891983	0.025081	21.7733	0.000451718	0.812895	0.378551	17.8948	0.916182	25.515	0.453442	10.7941	0.000730205	0.965562	0.000230812	0.309499
Butyl Formate	butylformate	592-84-7	106.1	105.1	15.7	6.5	9.2	0.000231808	1.26564	0.0283184	10.7548	0.00153275	1.15644	0.387238	13.9031	1.82312	32.0837	1.60863	18.5088	0.00358756	1.52497	0.00141348	0.577523
Butyl Lactate	butyllactate	138-22-7	186	120	15.8	6.5	10.2	0.00075517	3.41647	0.025656	23.7691	0.000284516	0.848864	0.365096	19.6576	0.722033	29.1655	0.91024	17.4532	0.00317737	2.03442	0.00138437	0.777212
Butyl Stearate	octadecanoicacidbutylester	123-95-5		25	14.5	3.7	3.5	3.80748e-06	3.80748e-06	0.0311188	0.0311188	4.71457e-06	4.71457e-06	0.608185	0.608185	0.0776366	0.0776366	0.0844741	0.0844741	5.65819e-05	5.65819e-05	1.45859e-05	1.45859e-05
Butyleneoxide	butoxide	106-88-7	63.3	62.3	16.3	6.2	5.9	0.00138515	0.0791685	0.0586035	1.17019	0.0140366	0.346436	1.15104	6.34309	9.42559	26.1491	4.94047	13.7002	0.00785177	0.19487	0.00349404	0.0810111
Butyraldehyde	butanal	123-72-8	74.8	73.8	15.6	10.1	6.2	0.00108237	0.239042	0.0337533	1.64787	0.0107759	0.673361	0.465786	4.82031	5.39016	26.4635	4.52169	17.0217	0.0062336	0.384859	0.00274565	0.16047
Butyric Acid	butyricacid	107-92-6	163.7	120	15.7	4.8	12	0.0526286	18.6314	0.00804324	10.2054	6.59729e-05	0.56084	0.0438738	3.89712	0.0170145	5.31381	0.141486	8.79081	14.2483	21.9809	10.1063	14.1325
Butyric Anhydride	butanoicacid,anhydride	106-31-0	200	120	15.8	10.3	4.5	4.35873e-05	1.70693	0.0199337	19.3471	0.000572944	1.01128	0.254352	14.3141	1.05559	28.1774	1.09499	16.8721	0.00106869	1.39609	0.000389724	0.501747
Butyronitrile	butyronitrile	109-74-0	117.6	116.6	15.3	12.4	5.1	0.000735243	7.78791	0.0153395	15.7061	0.05362	17.6149	0.119961	9.43297	1.89503	45.6979	3.31147	33.2402	0.00346529	3.7102	0.00147217	1.52756
Butyrylchloride	butyrylchloride	141-75-3	107	106	16.8	9.4	4.8	6.27249e-06	0.321185	0.0304959	13.1318	0.00142624	1.16208	0.472208	19.1171	2.28307	33.7932	1.13139	16.4766	0.00287906	1.58262	0.00070126	0.472598
Caffeine	caffeine	58-08-2		25	19.5	10.1	13	0.000610171	0.000610171	0.00190994	0.00190994	0.00029305	0.00029305	0.00583042	0.00583042	0.0278854	0.0278854	0.25593	0.25593	0.000303841	0.000303841	0.000134039	0.000134039
Camphene	camphene	79-92-5	160	120	16.4	1.8	3.1	2.33937e-07	0.133456	0.0749804	36.9264	1.64976e-05	0.122528	1.88735	37.0501	0.296045	20.6092	0.109928	5.85291	8.98899e-05	0.328946	1.4147e-05	0.0750914
Caprolactone (Epsilon)	2-oxepanone	502-44-3	215	120	18	15	7.4	0.00427283	11.5261	0.0119234	11.5823	0.0050079	3.70997	0.101468	5.64782	1.26177	29.2713	4.01896	27.0984	0.0030633	2.37124	0.00157137	1.08236
Carbazole (Diphenylenimine)	carbazole	86-74-8	354.7	120	21.7	6.4	6.2	0.000116537	2.30163	0.00569377	8.64147	0.0473217	6.31671	0.0333907	3.56901	0.293392	18.0252	0.277266	8.80754	0.187498	5.61226	0.0585739	2.15719
Carbon Dioxide (Fit = 1.0)	co2	124-38-9	-78.48	-79.48	15.7	6.3	5.7	nan	2.02366e-17	nan	1.47603e-06	nan	3.05663e-05	nan	0.282115	nan	nan	nan	nan	nan	4.29341e-05	nan	8.79342e-06
Carbon Disulfide (0 Dipole Moment)	cs2	75-15-0	46	45	20.2	0	0.6	3.14236e-08	1.76063e-06	0.0490435	0.277871	0.000302785	0.00327944	0.950828	2.7575	13.5559	22.5822	1.07296	2.80562	2.84034e-05	0.00035989	3.33392e-06	4.90678e-05
Carbon Disulfide (P By Group Cont.)	cs2	75-15-0	46	45	19.9	5.8	0.6	3.14236e-08	1.76063e-06	0.0490435	0.277871	0.000302785	0.00327944	0.950828	2.7575	13.5559	22.5822	1.07296	2.80562	2.84034e-05	0.00035989	3.33392e-06	4.90678e-05
Carbon Tetrachloride (0 Dipole Moment)	ccl4	56-23-5	76.8	75.8	17.8	0	0.6	5.92171e-08	0.000330828	0.0324095	1.66487	2.35523e-06	0.000955578	0.602096	6.08574	0.0755751	1.61268	0.09809	1.17533	2.21596e-05	0.00495979	3.02858e-06	0.000904414
Carbon Tetrachloride (P By Group Cont.)	ccl4	56-23-5	76.8	75.8	16.1	8.3	0	5.92171e-08	0.000330828	0.0324095	1.66487	2.35523e-06	0.000955578	0.602096	6.08574	0.0755751	1.61268	0.09809	1.17533	2.21596e-05	0.00495979	3.02858e-06	0.000904414
Carbonyl Sulfide	cos	463-58-1	-50	-51	17.4	3.7	0	nan	2.08093e-16	nan	1.69717e-05	nan	4.26381e-08	nan	0.0410512	nan	8.26329	nan	0.0788695	nan	7.9347e-09	nan	8.69355e-10
Cetyl Alcohol (1-Hexadecanol)	1-hexadecanol	36653-82-4	334	120	16.4	3.7	8.1	0.000110047	0.76932	0.0266503	19.6993	1.52834e-06	0.0351316	0.401134	15.6363	0.0136607	3.33294	0.0328193	2.84772	0.00132916	0.591027	0.000499717	0.194529
Chloral	trichloroacetaldehyde	75-87-6	97.8	96.8	17.2	7.4	7.6	1.02259e-05	0.0964702	0.0199787	4.90574	0.000754703	0.283469	0.282878	8.77618	0.818053	18.1266	0.658207	9.02793	0.00823171	0.881263	0.00213639	0.26168
Chlorine	cl2	7782-50-5	-34.05	-35.05	17.3	10	0	nan	4.71512e-14	nan	0.000117149	nan	5.82098e-09	nan	0.0688692	nan	0.0168505	nan	0.0108458	nan	3.94352e-08	nan	3.93202e-09
Chloro Acetaldehyde	chloroacetaldehyde	107-20-0	85.5	84.5	16.2	14	9	9.56252e-05	0.151608	0.000130501	0.0429287	1.37019e-05	0.00756966	5.49218e-05	0.00606112	0.000118956	0.018184	0.0498818	1.06639	0.000238929	0.0424015	7.49849e-05	0.015059
Chloro Acetic Acid	chloroaceticacid	79-11-8	189.3	120	17.7	10.4	12.3	1.19626	25.6648	0.000342581	0.838499	0.000232618	0.221091	0.000280029	0.0864913	0.00016109	0.137802	0.0269935	2.58019	nan	29.11	nan	21.4755
Chloro Maleic Anhydride	3-chloro-2,5-furandione	96-02-6	196	120	20.4	17.3	11.5	4.48868e-05	2.5648	0.00230717	5.26027	0.000669821	1.37711	0.00823805	1.64235	0.26799	23.5498	0.635984	16.1147	0.0106762	3.85941	0.00333548	1.44918
Chloroacetone	chloroacetone	78-95-5	120	119	16.8	9.6	5.5	0.000168828	3.96851	0.000746376	1.96969	7.68493e-05	0.44997	0.000987194	0.335069	0.00299489	1.55945	0.225566	10.2304	0.000291578	0.663929	0.000104097	0.253301
Chloroacetonitrile	chloroacetonitrile	107-14-2	126.5	120	17.4	13.6	2	0.000523481	8.45551	0.000569819	1.78491	0.0113114	7.72454	0.000597717	0.255772	0.00354354	2.27072	0.11736	9.02951	0.0339992	5.1981	0.0105093	1.93761
Chloroacetylchloride	chloroacetylchloride	79-04-9	106	105	17.5	9.2	5.5	0.000422701	2.25947	0.00839755	4.75874	0.0730214	5.8485	0.0640438	4.13654	1.21346	27.4451	1.27798	16.8094	1.07398	11.5646	0.337192	5.6571
Chloroacetylene	chloroethyne	593-63-5		25	16.2	2.1	2.5	0.000329691	0.000329691	0.0614184	0.0614184	1.1709	1.1709	1.29317	1.29317	15.3392	15.3392	2.25935	2.25935	2.81024	2.81024	0.916891	0.916891
Chlorobenzene	chlorobenzene	108-90-7	131.7	120	19	4.3	2	2.81182e-06	0.740486	0.0314852	32.9389	0.00371732	4.43188	0.50351	31.2955	2.73733	41.5396	0.599369	16.8965	0.00216618	2.75866	0.000445419	0.779879
Chlorodifluoromethane (Freon 22)	chf2cl	75-45-6	-40.7	-41.7	12.3	6.3	5.7	nan	1.83991e-07	nan	1.03726e-05	nan	1.39696	nan	0.00435805	nan	0.21475	nan	0.043521	nan	nan	nan	8.2684
Chloroform	chcl3	67-66-3	61.1	60.1	17.8	3.1	5.7	0.000734664	0.0321468	0.0307294	0.553461	0.216919	0.98853	0.54303	3.09457	2.26768	9.76203	1.07957	4.21308	4.39243	6.22446	1.91826	2.88226
Chloronitromethane	chloronitromethane	1794-84-9		25	17.4	13.5	5.5	0.00160163	0.00160163	0.00285812	0.00285812	0.0415444	0.0415444	0.0107681	0.0107681	0.470495	0.470495	1.15701	1.15701	3.76382	3.76382	1.66236	1.66236
Chloropicrin (Trichloronitromethane)	trichloronitromethane	76-06-2	112	111	17.6	6.8	7	5.4699e-07	0.0927461	0.0404065	17.6118	5.31432e-05	0.149861	0.951498	24.4421	2.22525	28.4901	0.763233	12.8856	0.00054778	0.628864	0.00010386	0.158955
Chloroprene	2-chloro-1,3-butadiene	126-99-8	59.4	58.4	16.1	5.4	2.1	4.00049e-06	0.000903038	0.0481542	0.758306	0.00656518	0.130306	0.916797	4.71631	4.74833	16.1588	0.905418	3.68802	0.00401477	0.0809579	0.000822316	0.0188772
Chlorotrifluoroethylene (Ctfe)	chlorotrifluoroethene	79-38-9	-27.8	-28.8	15.3	6.3	0	nan	5.94579e-14	nan	8.69976e-05	nan	7.52569e-10	nan	0.0186287	nan	0.000595491	nan	0.000515612	nan	4.52448e-09	nan	4.21583e-10
Cis-Decahydronaphthalene	cis-decalin	493-01-6	195.8	120	17.6	0	0	5.50604e-08	0.058725	0.0770315	36.9602	7.73847e-07	0.0186918	1.93608	37.046	0.0547522	8.49493	0.0335331	2.93771	1.66233e-05	0.117533	2.06513e-06	0.0238389
Citraconic Anhydride	methyl-maleic-anhydride	616-02-4	213.5	120	19.2	17	11.2	2.06551e-05	2.04927	0.0012611	3.27447	0.000120819	0.56417	0.00265544	0.74142	0.0454769	10.5516	0.383258	13.1365	0.00042935	1.05941	0.00014484	0.388345
Coumarin	2h-1-benzopyran-2-one	91-64-5	301.7	120	20	12.5	6.7	0.000158462	2.59748	0.00309847	5.2683	0.000477236	1.05287	0.0118924	1.62791	0.0883873	11.4752	0.289057	9.72481	0.000545421	0.851416	0.000209629	0.323496
Crotonaldehyde	trans-crotonaldehyde	123-73-9	102.2	101.2	16.2	14.9	7.4	0.00371368	4.52273	0.0172836	5.68315	0.0234669	5.64321	0.153409	5.54958	3.82962	38.1962	5.1041	28.674	0.00576768	1.9525	0.00281141	0.879963
Crotonic Acid	trans-crotonic-acid	107-93-7	184.7	120	16.8	8.7	12	0.0288222	16.6424	0.00417536	6.18146	5.46561e-05	0.489346	0.0149235	1.74915	0.00975242	3.34106	0.105709	7.05697	9.1627	17.3991	5.31091	10.0348
Crotonlactone	2(5h)-furanone	497-23-4	212	120	19	19.8	9.6	0.000276356	4.33442	0.000360759	0.91395	2.63554e-05	0.150583	0.00028146	0.0939875	0.00103188	0.473003	0.124834	5.92311	6.36818e-05	0.199506	2.55227e-05	0.0827257
Cyanamid (Carbamonitrile)	cyanamide	420-04-2		25	15.5	27.6	16.8	3.98155e-05	3.98155e-05	1.67764e-07	1.67764e-07	6.49196e-10	6.49196e-10	5.8398e-10	5.8398e-10	1.06162e-12	1.06162e-12	3.81432e-06	3.81432e-06	1.02328e-06	1.02328e-06	2.80714e-07	2.80714e-07
Cyanogen	cyanogen	460-19-5	-21.1	-22.1	15.1	11.8	0	nan	7.07143e-11	nan	7.30118e-06	nan	0.00110762	nan	9.57221e-05	nan	0.0154129	nan	0.0166065	nan	1.82494e-07	nan	3.94269e-08
Cyanogen Bromide	cyanogenbromide	506-68-3		25	18.3	15.2	0	4.5606e-06	4.5606e-06	0.000947405	0.000947405	0.0215319	0.0215319	0.00199102	0.00199102	0.750102	0.750102	0.323194	0.323194	4.16601e-05	4.16601e-05	1.30383e-05	1.30383e-05
Cyanogen Chloride	cyanogenchloride	506-77-4		25	15.6	14.5	0	2.86174e-05	2.86174e-05	0.0074647	0.0074647	0.030165	0.030165	0.0409152	0.0409152	1.28632	1.28632	2.5933	2.5933	0.00052027	0.00052027	0.000177344	0.000177344
Cyclobutanone	cyclobutanone	1191-95-3		25	18.3	11.4	5.2	0.00164482	0.00164482	0.0245803	0.0245803	0.027827	0.027827	0.284525	0.284525	6.72974	6.72974	6.70487	6.70487	0.00715997	0.00715997	0.00337103	0.00337103
Cyclodecanone	cyclodecanone	1502-06-3		25	16.8	8	4.1	0.000469872	0.000469872	0.0366499	0.0366499	0.000438039	0.000438039	0.669479	0.669479	1.01838	1.01838	1.03021	1.03021	0.00115434	0.00115434	0.000496514	0.000496514
Cyclododecane	cyclododecane	294-62-2		25	16.4	0	0	5.07948e-08	5.07948e-08	0.0640572	0.0640572	6.79289e-07	6.79289e-07	1.50308	1.50308	0.0426669	0.0426669	0.028807	0.028807	1.43993e-05	1.43993e-05	1.82222e-06	1.82222e-06
Cycloheptane	cycloheptane	291-64-5	118.4	117.4	17.1	1.4	1.9	7.4225e-08	0.0627417	0.111083	40.7575	1.39822e-06	0.0286436	3.04694	44.7045	0.104056	15.2209	0.0497747	4.07729	2.64989e-05	0.162229	3.25066e-06	0.0323419
Cycloheptanone	cycloheptanone	502-42-1	179	120	17.2	10.6	4.8	0.0029165	8.30336	0.0380696	30.1045	0.00453324	3.91347	0.661027	27.2041	3.77003	41.7472	3.86792	27.9439	0.00420077	3.17989	0.00212246	1.35672
Cyclohexane	cyclohexane	110-82-7	80.7	79.7	16.8	0	0.2	8.84557e-08	0.000906749	0.135618	6.86629	2.55981e-06	0.00174282	3.9976	23.9615	0.189309	4.60544	0.0644877	1.15872	3.8523e-05	0.012671	4.70488e-06	0.0021723
Cyclohexanol	cyclohexanol	108-93-0	160.8	120	17.4	4.1	13.5	0.00221348	7.68889	0.0207882	22.1268	7.16119e-06	0.259564	0.20898	14.672	0.0168175	8.40549	0.0896888	8.62565	0.00788111	3.6781	0.00343151	1.5126
Cyclohexanone	cyclohexanone	108-94-1	155.4	120	17.8	8.4	5.1	0.0037231	10.7971	0.0364928	30.7652	0.00991365	6.65501	0.598414	27.2924	5.27444	46.2954	5.18333	32.2224	0.00604994	4.37784	0.0030707	1.93823
Cyclohexene	cyclohexene	110-83-8	82.9	81.9	17.2	1	2	7.1409e-07	0.00518152	0.127882	7.59775	0.000127118	0.0404875	3.80287	25.0886	1.63496	19.5025	0.325472	4.08524	0.000344499	0.0791475	5.89714e-05	0.0170783
Cyclohexyl Benzene	cyclohexylbenzene	827-52-1	240.1	120	18.7	0	1	6.09277e-07	0.241149	0.0483809	30.4804	0.000140857	0.440422	1.02871	29.2774	0.661186	24.4626	0.209349	7.8598	0.000271864	0.616111	5.03506e-05	0.156018
Cyclohexylamine	cyclohexylamine	108-91-8	134	120	17.2	3.1	6.5	6.86248	23.6219	0.0465098	35.7809	0.00213751	4.76094	0.809821	33.9494	0.762881	39.544	1.5438	25.3	0.0141843	4.57375	0.00886167	2.20289
Cyclohexylchloride	chlorocyclohexane	542-18-7	142	120	17.3	5.5	2	1.44978e-06	0.481794	0.0577992	37.1553	0.000232737	0.82829	1.31884	37.4871	1.14077	34.7198	0.575396	15.5233	0.000483987	1.15132	0.000101072	0.310733
Cyclooctanone	cyclooctanone	502-49-8	196	120	17	9.6	4.5	0.00178602	5.87689	0.0383162	29.3168	0.0019586	2.22713	0.687406	26.7407	2.45525	36.9354	2.51688	23.3043	0.00271945	2.27853	0.0013271	0.925785
Cyclopentadiene	cyclopentadiene	542-92-7	41	40	17	1.9	2	4.80595e-06	6.85294e-05	0.0687874	0.253108	0.0126628	0.0545216	1.43045	3.06874	8.85649	15.1564	1.51218	2.8883	0.0033924	0.0158816	0.000761845	0.00375015
Cyclopentane	cyclopentane	287-92-3	49.3	48.3	16.4	0	1.8	1.25061e-07	1.04372e-05	0.171153	1.08186	6.07431e-06	0.000125186	5.35735	12.5176	0.380569	1.64337	0.0969522	0.370352	6.73952e-05	0.00103318	8.34372e-06	0.000150193
Cyclopentanone	cyclopentanone	120-92-3	130.5	120	17.9	11.9	5.2	0.00388538	13.5604	0.0323606	30.0813	0.0175433	9.84462	0.469509	24.9978	6.17602	50.0645	6.71165	36.6835	0.00780557	5.72249	0.00394919	2.63022
Cyclopentene	cyclopentene	142-29-0	44.2	43.2	16.7	3.8	1.7	9.25355e-07	2.51142e-05	0.154914	0.680302	0.000421115	0.00318245	4.85251	9.88201	3.87533	9.06978	0.481484	1.18686	0.000669399	0.00476851	0.000114337	0.000887179
Cyclopentyl Methyl Ether (Cpme)	cyclopentyl-methyl-ether	5614-37-9	106	105	16.7	4.3	4.3	0.000846407	0.925367	0.0790985	19.611	0.000670165	0.553157	1.99364	31.344	2.69248	33.5896	1.20222	14.6033	0.00165574	0.815286	0.000652281	0.274241
Cyclopropane	cyclopropane	75-19-4	-32.8	-33.8	17.3	0	0	nan	7.13452e-13	nan	0.000505282	nan	1.17227e-06	nan	0.431051	nan	0.565	nan	0.0394572	nan	6.78313e-07	nan	8.84546e-08
Cyclopropylmethylketone	1-cyclopropylethanone	765-43-5	111.3	110.3	17	11.1	4.6	0.00381671	6.53527	0.0285988	15.2223	0.0129944	5.8751	0.372417	16.3414	4.61095	43.7472	4.28005	29.2596	0.00646604	3.13351	0.00317654	1.3769
Cyclopropylnitrile	cyclopropanecarbonitrile	5500-21-0	135.1	120	18.6	16.2	5.7	0.000596957	8.78401	0.00518365	8.73807	0.0202532	14.3929	0.0199296	2.73281	0.299017	31.5722	1.52568	27.4391	0.00136054	2.38465	0.000568798	0.968826
DDT	ddt	50-29-3		25	20	5.5	3.1	1.22391e-06	1.22391e-06	0.0106364	0.0106364	0.000282988	0.000282988	0.125813	0.125813	0.21746	0.21746	0.158082	0.158082	0.000682477	0.000682477	0.000142253	0.000142253
Decamethylcyclopentasiloxane	decamethylcyclopentasiloxane	541-02-6	210	120	12.9	1.3	1	8.84942e-07	0.112757	0.0268452	17.8661	8.91644e-06	0.040757	0.525583	15.5747	0.10688	6.31754	0.0820775	3.0037	6.62728e-05	0.151271	1.41463e-05	0.0391163
Decane	n-decane	124-18-5	174.1	120	15.7	0	0	4.71116e-08	0.0501164	0.0753281	36.3381	5.69695e-07	0.0132073	1.78388	35.6071	0.0416603	5.90841	0.0291274	2.47894	1.30116e-05	0.0907069	1.59563e-06	0.018196
Di p-Tolyl Sulfoxide	bis(4-methylphenyl)sulfoxide	1774-35-2		25	20.3	11.4	3.1	0.000601499	0.000601499	0.00876524	0.00876524	0.000734471	0.000734471	0.0739159	0.0739159	0.318638	0.318638	0.409636	0.409636	0.000670728	0.000670728	0.000275569	0.000275569
Di-(2-Chloro-Isopropyl) Ether	dcip	108-60-1	187	120	19	8.2	5.1	2.98659e-05	1.19488	0.0099699	14.0439	0.000373324	0.876021	0.0856079	8.1124	0.208581	16.5607	0.580032	12.9935	0.000679243	1.09036	0.000197957	0.353908
Di-(2-Chloroethoxy) Methane	di-(2-chloroethoxy)methane	111-91-1	218	120	17.1	10.2	7.1	3.92579e-05	1.56793	0.0019228	4.08725	0.000103341	0.427684	0.00582511	1.16322	0.0162388	3.77801	0.312664	9.49482	0.000224956	0.586546	7.20557e-05	0.204526
Di-(2-Chloroethyl) Ether	bis(2-chloroethyl)ether	111-44-4	178.5	120	18.8	9	5.7	4.48022e-05	1.85324	0.00217959	5.09162	0.000190759	0.793436	0.00683839	1.51568	0.0241321	6.21103	0.403761	12.2282	0.00030235	0.843044	9.31226e-05	0.289407
Di-(2-Methoxyethyl) Ether	diglyme	111-96-6	162	120	15.7	6.1	6.5	0.017295	12.8849	0.019419	16.2192	0.00673809	3.80082	0.229706	10.4127	2.20691	32.4191	4.57677	26.7474	0.00446789	2.4972	0.0024684	1.15148
Di-2-Ethylhexyl Amine	2-ethyl-n-(2-ethylhexyl)-1-hexanamine	106-20-7		25	15.6	0.8	3.2	6.13596e-05	6.13596e-05	0.0451856	0.0451856	2.69674e-06	2.69674e-06	0.965169	0.965169	0.0563251	0.0563251	0.0499017	0.0499017	4.30888e-05	4.30888e-05	9.78257e-06	9.78257e-06
Di-Isobutyl Carbinol	2,6-dimethyl-4-heptanol	108-82-7	174.5	120	14.9	3.1	10.8	0.000358757	1.96312	0.0344678	27.0252	8.88602e-06	0.157835	0.522237	23.0803	0.0365626	9.95841	0.0685664	6.02586	0.00580317	1.77267	0.0022002	0.617449
Di-Isobutyl Ketone	2,6-dimethyl-4-heptanone	108-83-8	169.4	120	16	3.7	4.1	0.000102952	1.34929	0.0491875	31.6571	0.000226733	0.529188	1.00213	30.1212	0.867896	27.4941	0.667794	13.391	0.000730162	0.963127	0.000264716	0.315945
Di-Isodecyl Phthalate	diisodecyl-phthalate	26761-40-0		25	16.6	6.2	2.6	3.87671e-06	3.87671e-06	0.0195199	0.0195199	2.0498e-05	2.0498e-05	0.325723	0.325723	0.131067	0.131067	0.118526	0.118526	0.000123129	0.000123129	3.3561e-05	3.3561e-05
Di-Isononyl Phthalate	1,2-benzenedicarboxylicaciddiisononylester	28553-12-0		25	16.6	6.6	2.9	4.80568e-06	4.80568e-06	0.0192958	0.0192958	2.8073e-05	2.8073e-05	0.314991	0.314991	0.156463	0.156463	0.138843	0.138843	0.000149025	0.000149025	4.15842e-05	4.15842e-05
Di-Isopropyl Sulfoxide	diisopropylsulfoxide	2211-89-4		25	17	11.5	7.4	0.25611	0.25611	0.0231649	0.0231649	0.0150127	0.0150127	0.307216	0.307216	3.3137	3.3137	5.76067	5.76067	0.0102256	0.0102256	0.00621526	0.00621526
Di-n-Butyl Ether	di-n-butylether	142-96-1	140.2	120	15.2	3.4	3.2	0.000222786	0.991157	0.0714141	36.9044	7.3184e-05	0.254371	1.733	36.7882	0.673039	25.8505	0.422858	10.607	0.00040268	0.627317	0.000141495	0.189264
Di-n-Butyl Sulfoxide	1,1'-sulfinylbisbutane	2168-93-6		25	16.4	10.5	6.1	0.147213	0.147213	0.0219712	0.0219712	0.00291877	0.00291877	0.290198	0.290198	1.18262	1.18262	2.87314	2.87314	0.00521141	0.00521141	0.00313015	0.00313015
Di-n-Pentyl Ether	di-n-pentylether	693-65-2	190	120	15.6	3.1	3	8.72329e-05	0.543754	0.0614225	32.8518	2.32802e-05	0.10753	1.42472	31.9876	0.30242	16.3765	0.227853	6.97789	0.000187869	0.351517	5.95299e-05	0.100246
Di-n-Propyl Ether	di-n-propylether	111-43-3	90	89	15.1	3.2	3.2	0.00060245	0.194474	0.087589	8.3513	0.000305121	0.0921974	2.26407	21.6238	1.86129	20.3073	0.897935	7.8378	0.00102578	0.194417	0.000398254	0.0643682
Di-n-Propyl Sulfoxide	1,1'-sulfinylbispropane	4253-91-2		25	17	13	7.4	0.251444	0.251444	0.019449	0.019449	0.00761472	0.00761472	0.22631	0.22631	1.75235	1.75235	4.61737	4.61737	0.00823874	0.00823874	0.00491069	0.00491069
Di-sec-Butyl Ether	2,2'-oxybis-butane	6863-58-7	120.85	119.85	15.2	3.5	3.3	0.000353773	0.904834	0.0724613	36.8932	5.59548e-05	0.217485	1.76301	36.9452	0.588899	24.948	0.32893	9.42063	0.000361327	0.564749	0.000124436	0.165607
Diacetone Alcohol	4-oh-4-me-2-pentanone	123-42-2	167.9	120	15.8	8.2	10.8	0.0136216	10.8409	0.0152029	17.2744	0.00133891	2.08679	0.144392	10.2929	0.6998	29.9311	2.11878	23.9226	0.00327415	2.52614	0.00162728	1.09174
Diallyl Amine	n-2-propenyl-2-propen-1-amine	124-02-7	111	110	15.6	4.5	6.7	0.067615	3.80137	0.0479803	20.5093	0.00431886	3.01498	0.839077	26.0817	2.32264	37.603	1.17738	17.8	0.00514017	1.95841	0.00219589	0.700768
Diallyl Ether	diallylether	557-40-4	94	93	15.3	4.4	5.3	0.000456748	0.407828	0.0331545	5.56042	0.00456925	1.05756	0.478032	10.0851	2.7177	27.5665	1.63509	13.5202	0.00255752	0.596769	0.000956689	0.211147
Diazomethane	diazomethane	334-88-3	-23	-24	14.7	6.1	11.3	nan	4.69474e-09	nan	5.19884e-05	nan	1.1634	nan	0.0029544	nan	1.63619	nan	0.391138	nan	0.000375162	nan	9.73381e-05
Dibenzyl Ether	dibenzylether	103-50-4	298	120	19.6	3.4	5.2	7.19833e-05	1.0746	0.0108837	12.341	0.000980196	1.27558	0.099121	6.9615	0.415558	18.2053	0.402169	9.45719	0.000596056	0.830503	0.000190708	0.273216
Dibromomethane (Methylene Dibromide)	ch2br2	74-95-3	97	96	19	6.4	7	9.14583e-06	0.0706425	0.00172553	0.774874	0.398524	6.88756	0.00616068	0.497376	0.855306	18.9692	0.181042	3.92175	0.0102575	0.769288	0.00242106	0.218224
Dibutyl Amine	dibutylamine	111-92-2	159.6	120	15	3	4.3	0.278897	4.85179	0.0641965	36.0541	0.000139207	0.448414	1.42203	35.377	0.453007	24.8311	0.437901	11.3636	0.00126633	0.917843	0.00066389	0.319152
Dibutyl Ketone	5-nonanone	502-56-7	188.4	120	16	7.7	4.4	0.000224949	1.95827	0.0444278	30.1396	0.000404207	0.768304	0.85945	28.1196	1.11762	29.4249	0.910258	15.3328	0.000994354	1.15715	0.000395383	0.402139
Dibutyl Maleate	(z)-2-butenedioicaciddibutylester	105-76-0	281	120	16.5	6.1	7.2	4.47661e-05	1.15559	0.0150007	14.2132	0.000225042	0.452252	0.176195	9.5677	0.344923	16.167	0.444256	9.86837	0.000838039	0.851257	0.000301176	0.297489
Dibutyl Phthalate	dibutylphthalate	84-74-2		25	17.8	8.6	4.1	2.30867e-05	2.30867e-05	0.0152591	0.0152591	0.000192328	0.000192328	0.195425	0.195425	0.388813	0.388813	0.364213	0.364213	0.000449709	0.000449709	0.000150663	0.000150663
Dibutyl Sebacate	decanedioicaciddibutylester	109-43-3		25	16.7	4.5	4.1	4.48027e-05	4.48027e-05	0.0213826	0.0213826	7.34785e-05	7.34785e-05	0.341513	0.341513	0.307096	0.307096	0.388535	0.388535	0.000310518	0.000310518	0.000114824	0.000114824
Dichloroacetaldehyde	dichloroacetaldehyde	79-02-7	89.2	88.2	16.7	9.1	7.5	0.000114308	0.213002	0.0130141	2.1463	0.005175	0.724737	0.125847	3.58123	0.754385	16.8863	0.940158	10.2421	0.0885755	2.64587	0.0262971	0.937394
Dichloroacetic Acid	dichloroaceticacid	79-43-6	194	120	18.2	8.1	12.2	nan	nan	0.0038229	5.86226	10.1129	17.123	0.0172934	1.98399	0.0382487	9.58366	0.212172	11.3565	nan	nan	nan	nan
Dichloroacetonitrile	dichloroacetonitrile	3018-12-0	112	111	17.4	9.4	6.4	0.00183831	4.57071	0.0057974	5.53733	0.238196	11.7134	0.0317207	3.14056	0.172165	20.4126	0.360934	12.5473	3.69387	13.7829	1.57865	7.33539
Dichlorodifluoromethane (Freon 12)	dichlorodifluoromethane	75-71-8	-29.8	-30.8	14.9	2	0	nan	1.40715e-14	nan	9.98854e-05	nan	1.18409e-10	nan	0.0313276	nan	0.000318087	nan	0.000644904	nan	1.71652e-09	nan	1.38012e-10
Dichloroethylene (Trans)	trans-1,2-dichloroethene	156-60-5	48.7	47.7	16.7	7.8	3.3	4.07613e-05	0.00110092	0.0440009	0.303674	0.040028	0.209047	0.887904	2.78972	4.87998	11.4879	1.22876	3.16722	0.140745	0.521994	0.0326038	0.132125
Dichloromethyl Methyl Ether	dichloromethylmethylether	4885-02-3		25	17.1	12.9	6.5	7.39732e-05	7.39732e-05	0.019366	0.019366	0.0174987	0.0174987	0.246034	0.246034	2.08673	2.08673	1.16259	1.16259	0.136238	0.136238	0.0368758	0.0368758
Dichloromonofluoromethane (Freon21)	chfcl2	75-43-4	8.9	7.9	15.8	3.1	5.7	nan	0.000310222	nan	0.00765941	nan	1.41486	nan	0.317161	nan	3.5945	nan	0.907349	nan	8.8457	nan	5.34518
Diethanolamine	diethanolamine	111-42-2	268.8	120	17.2	7	19	0.0212797	16.1332	0.00505326	5.95013	0.00012018	0.635921	0.0217135	1.87117	0.0221875	5.09057	0.63982	16.4164	0.00161576	1.38848	0.000806576	0.642217
Diethyl Adipate	adipinsaeurediethylester	141-28-6	245	120	16.4	6.2	7.5	0.000230993	2.52256	0.0139852	13.2179	0.000525711	0.739506	0.153855	8.29632	0.683721	20.4675	1.19126	14.9927	0.000945947	1.0228	0.000407765	0.397198
Diethyl Amine	diethylamine	109-89-7	55.5	54.5	14.9	2.3	6.1	3.33724	4.49256	0.0929589	1.00172	0.00403044	0.06952	2.2153	7.97575	3.3716	13.0395	2.25168	6.43811	0.0134424	0.121562	0.00816084	0.0641413
Diethyl Carbonate	diethylcarbonate	105-58-8	126	120	15.1	6.3	3.5	0.000190456	3.80458	0.0221477	23.0699	0.00217675	2.80535	0.281991	17.6595	2.61319	39.1157	2.34465	24.7856	0.00220197	2.58555	0.000905469	1.0073
Diethyl Ether	diethylether	60-29-7	34.5	33.5	14.5	2.9	4.6	0.0024938	0.00577508	0.109606	0.225545	0.00345397	0.00789228	3.03386	4.40743	8.02171	10.8394	2.98457	3.97095	0.00464202	0.0102706	0.00205916	0.00440328
Diethyl Ketone	3-pentanone	96-22-0	101.9	100.9	15.8	7.6	4.7	0.00175214	2.28342	0.0434379	11.1184	0.00745058	2.48927	0.73668	18.0108	5.32491	39.161	3.90422	24.2225	0.00542495	1.66514	0.00253769	0.691728
Diethyl Malonate	diethylmalonate	105-53-3	200	120	16.1	7.7	8.3	0.000114252	2.65118	0.00843183	10.3264	0.000425958	0.842257	0.0629416	5.06819	0.385957	20.0556	1.00058	16.1882	0.00104861	1.30555	0.000418602	0.504645
Diethyl Oxalate	ethyloxalat	95-92-1	185.7	120	16.2	8	8.8	0.000108573	2.91265	0.00848738	10.2331	0.000817245	1.27559	0.0634126	4.92467	0.77041	25.051	1.51789	19.053	0.000951451	1.37545	0.00038839	0.540515
Diethyl Phthalate	diethylphthalate	84-66-2		25	17.6	9.6	4.5	4.56081e-05	4.56081e-05	0.00853329	0.00853329	0.000417471	0.000417471	0.0718569	0.0718569	0.362329	0.362329	0.504721	0.504721	0.000570007	0.000570007	0.000207145	0.000207145
Diethyl Succinate	ethylsuccinate	123-25-1	217.7	120	16.2	6.8	8.7	0.000129245	2.48406	0.0104319	11.8063	0.000443911	0.790604	0.091553	6.47794	0.486104	20.5125	1.05397	15.6261	0.000920227	1.17903	0.000370867	0.45084
Diethyl Sulfate	diethylsulfate	64-67-5	208	120	15.7	12.7	5.1	8.45969e-06	1.23981	0.00844867	12.6711	0.000387851	0.959545	0.0660048	6.8373	0.58108	26.2183	1.03281	17.5028	0.000699513	1.43896	0.000218078	0.498076
Diethyl Sulfide	diethylsulfide	352-93-2	92.1	91.1	16.8	3.1	2	1.45982e-05	0.0834991	0.0620961	7.93558	0.0064078	1.28484	1.3063	18.9829	5.77129	34.1208	1.96968	15.3663	0.00164238	0.449852	0.00045066	0.133178
Diethyldisulfide	diethyldisulfide	110-81-6	154.1	120	17	6.7	5.7	1.47232e-06	0.456758	0.0435572	33.6644	0.00304201	3.51853	0.831491	32.6111	4.01868	41.7261	1.08628	20.1938	0.00081533	1.47578	0.000167466	0.399474
Diethylene Glycol	diethyleneglycol	111-46-6	245.8	120	16.6	12	19	0.00813332	12.6978	0.00551564	6.81141	2.70015e-05	0.311124	0.0250826	2.27512	0.014649	4.26451	0.366262	13.0445	0.00252058	1.74856	0.00120965	0.789661
Diethylene Glycol Butyl Ether Acetate	2-(2-butoxyethoxy)ethanolacetate	124-17-4	245	120	16	4.1	8.2	0.00244943	4.1934	0.0138169	12.938	0.000541517	0.757178	0.148987	7.99873	0.488626	18.106	1.11157	14.4322	0.00121653	1.04052	0.000578418	0.41976
Diethylene Glycol Dibutyl Ether	diethyleneglycoldibutylether	112-73-2	256	120	15.8	4.7	4.4	0.0120613	4.49534	0.0279566	20.2347	0.000419961	0.541339	0.469409	16.766	0.680069	19.4613	1.04154	12.6993	0.00136224	0.874629	0.000733175	0.349615
Diethylene Glycol Diethyl Ether	1,1'-oxybis-2-ethoxy-ethane	112-36-7	188	120	15.8	5.9	5.6	0.00985386	8.28173	0.0240217	19.3163	0.00234537	1.92059	0.34188	14.5655	1.60287	29.0683	2.65183	21.1084	0.00285848	1.77308	0.00154534	0.767686
Diethylene Glycol Hexyl Ether	2-2-(hexyloxy)ethoxyethanol	112-59-4	260	120	16	6	10	0.00198673	3.99789	0.0191697	17.0173	0.000104164	0.392275	0.23703	12.0434	0.178673	14.1571	0.507421	11.543	0.00145912	1.09584	0.000714857	0.435963
Diethylene Glycol Monobutyl Ether	diethyleneglycolmonobutylether	112-34-5	231	120	16	7	10.6	0.00384385	6.2325	0.0170886	16.1867	0.000179158	0.618283	0.187984	10.5839	0.212806	16.5626	0.735299	14.5082	0.00210297	1.50109	0.00106652	0.628163
Diethylene Glycol Monoethyl Ether	diethyleneglycolmonoethylether	111-90-0	196	120	16.1	9.2	12.2	0.0234238	11.1805	0.0205776	18.9771	0.00331908	2.7927	0.253538	13.1622	1.74303	32.5358	3.30028	24.524	0.00404553	2.42906	0.00218032	1.08155
Diethylene Glycol Monoethyl Ether Acetate	2-(2-ethoxyethoxy)-ethanolacetate	112-15-2	218.5	120	16.2	5.1	9.2	0.00191304	5.47334	0.011215	10.8801	0.0010956	1.18902	0.102039	5.80419	0.630956	20.0085	1.74925	17.8152	0.00139371	1.22979	0.000676959	0.5179
Diethylene Glycol Monomethyl Ether	2-(2-methoxyethoxy)ethanol	111-77-3	193	120	16.2	7.8	12.6	0.0380179	14.0612	0.0169031	16.4886	0.00481387	3.63407	0.178569	10.0508	1.77087	33.5264	4.01295	26.995	0.00485577	2.81404	0.00262402	1.28825
Diethylene Glycol Monopropyl Ether	2-(2-propoxyethoxy)ethanol	6881-94-3		25	16	7.2	11.3	0.00537325	0.00537325	0.0159305	0.0159305	0.000247796	0.000247796	0.163365	0.163365	0.236221	0.236221	0.905928	0.905928	0.00252134	0.00252134	0.00129531	0.00129531
Diethylenetriamine	n-(2-aminoethyl)-1,2-ethanediamine	111-40-0	207	120	16.7	7.1	14.3	7.61531	31.7279	0.0127797	14.4697	0.00452279	7.23095	0.0958388	7.29058	0.152908	21.7111	1.60489	25.7356	0.0106018	4.03328	0.00586863	2.02345
Diethylhexyl Phthalate (Dioctyl Phthalate)	di-2-ethylhexylphthalate	117-81-7		25	16.6	7	3.1	9.45787e-06	9.45787e-06	0.0187021	0.0187021	5.4155e-05	5.4155e-05	0.296462	0.296462	0.211119	0.211119	0.171791	0.171791	0.000198834	0.000198834	6.04664e-05	6.04664e-05
Dihexyl Ether	di-n-hexylether	112-58-3	223	120	16	3	2.8	4.17419e-05	0.353443	0.0539639	29.7174	1.06206e-05	0.0594957	1.20727	28.2984	0.171701	10.9671	0.147285	5.10387	0.000109177	0.233382	3.19241e-05	0.0640637
Dihexyl Phthalate	dihexylphthalate	84-75-3		25	17	7.6	3.6	1.07096e-05	1.07096e-05	0.0181034	0.0181034	7.78197e-05	7.78197e-05	0.269266	0.269266	0.267821	0.267821	0.233474	0.233474	0.000277175	0.000277175	8.48045e-05	8.48045e-05
Dihydropyran	2,3-dihydropyran	110-87-2	86	85	17.5	5.5	5.7	7.48348e-05	0.112316	0.0527038	5.03055	0.00428899	0.723403	1.02566	14.4262	5.0871	31.1805	1.93327	13.5543	0.00326816	0.525065	0.00104019	0.170405
Diisobutyl Adipate	rhodiasolv-dib1_cas_141_04_8	141-04-8		25	16.7	2.5	6.2	9.72981e-05	9.72981e-05	0.0201364	0.0201364	0.000189115	0.000189115	0.294415	0.294415	0.463166	0.463166	0.614764	0.614764	0.000537736	0.000537736	0.000214393	0.000214393
Diisopropylamine	diisopropylamine	108-18-9	83.9	82.9	14.8	1.7	3.5	0.739369	2.25762	0.0805233	5.5535	0.000604632	0.105666	1.92199	17.0643	1.29135	15.5642	0.908719	6.75988	0.0031948	0.21368	0.0017662	0.0864884
Diketene	4-methylene-2-oxetanone	674-82-8	126.1	120	16.2	14.5	7.8	4.22632e-05	3.43071	0.00181288	5.34909	0.000453811	1.89089	0.00421745	1.36388	0.0556503	19.405	0.385914	16.8731	0.00113881	2.37735	0.00036856	0.861144
Dimethoxymethane	dimethoxymethane	109-87-5	42	41	15	1.8	8.6	0.00389167	0.02157	0.0393993	0.157299	0.0143999	0.0609806	0.617722	1.38303	7.24146	12.688	5.60309	8.72427	0.00850616	0.0363177	0.00405142	0.0167143
Dimethyl Isosorbide	dimethylisosorbide	5306-85-4		25	17.6	7.1	7.5	0.00139036	0.00139036	0.00725967	0.00725967	0.000648014	0.000648014	0.0507707	0.0507707	0.263641	0.263641	1.29663	1.29663	0.000937394	0.000937394	0.000433564	0.000433564
Dimethyl Acetylene	2-butyne	503-17-3	26.9	25.9	15.1	3.4	7.6	1.1729e-05	1.38207e-05	0.0691192	0.0750884	0.0260461	0.0285171	1.30721	1.37339	11.2311	11.6291	2.6615	2.76477	0.00467056	0.00515343	0.00118227	0.00130735
Dimethyl Adipate	dimethyl_adipate	627-93-0	115	114	16.3	6.8	8.5	0.000269296	2.09969	0.00884306	6.42942	0.000567736	0.593287	0.0696479	3.79635	0.469255	15.8379	1.31225	14.6054	0.000901211	0.78089	0.000390906	0.313426
Dimethyl Amine	dimethylamine	124-40-3	6.8	5.8	15.3	4.8	11.2	nan	9.56086	nan	0.0138691	nan	0.0043707	nan	0.613856	nan	2.04799	nan	2.78254	nan	0.0168182	nan	0.0105338
Dimethyl Carbonate	dimethylcarbonate	616-38-6	90.5	89.5	15.5	8.6	9.7	0.000248208	0.459179	0.00838681	1.50573	0.00221905	0.536722	0.0538524	1.55187	1.20534	18.4635	2.54303	16.0242	0.00175865	0.442202	0.000729337	0.179584
Dimethyl Cellosolve	1,2-dimethoxyethane	110-71-4	85	84	15.4	6	6	0.0255048	2.47141	0.0364688	3.06431	0.0230277	1.67428	0.569848	6.94273	7.01123	30.0447	7.56582	22.6745	0.0108241	0.819784	0.00599403	0.398354
Dimethyl Disulfide	dimethyldisulfide	624-92-0	109.8	108.8	17.6	7.8	6.5	4.02384e-06	0.348598	0.0275198	15.6574	0.0295342	8.24533	0.372989	20.2936	7.61696	45.2688	2.81248	25.926	0.00204534	1.75409	0.000477025	0.512221
Dimethyl Ethanolamine	2-(dimethylamino)-ethanol	108-01-0	134	120	16.1	9.2	14	0.0791774	17.8973	0.0549914	38.4958	0.011468	7.63181	1.08987	37.6947	6.44268	50.3408	6.13509	34.7775	0.0137784	5.96146	0.00809346	2.85593
Dimethyl Ether	dimethylether	115-10-6	-24.8	-25.8	15.2	6.1	5.7	nan	0.000169447	nan	0.000570243	nan	0.00154044	nan	0.191505	nan	7.61795	nan	5.08176	nan	0.000263052	nan	0.000173119
Dimethyl Formamide (DMF)	dimethylformamide	68-12-2	153	120	17.4	13.7	11.3	0.167752	30.8026	0.0204049	16.2081	0.154304	18.3548	0.207871	8.99778	7.37741	47.8679	12.0747	41.9121	0.0226289	7.34856	0.0130536	4.0003
Dimethyl Glutarate	pentanedioicaciddimethylester	1119-40-0	214	120	16.1	7.7	8.3	0.000251692	3.49556	0.00608998	7.51868	0.000454572	0.775979	0.0368854	3.06888	0.285275	15.5376	1.18377	16.1732	0.000722803	1.01073	0.00030979	0.406169
Dimethyl Ketene	2-methyl-1-propen-1-one(dimethylketene)	598-26-5		25	15.2	7.4	4.8	3.39158e-06	3.39158e-06	0.0932541	0.0932541	0.00214666	0.00214666	2.40873	2.40873	9.87202	9.87202	1.44857	1.44857	0.00236775	0.00236775	0.00053356	0.00053356
Dimethyl Maleate	dimethylmaleate	624-48-6	202	120	16.3	8.3	9.8	8.14209e-05	2.48491	0.00253124	4.46591	0.000179145	0.534637	0.00846622	1.28386	0.05915	8.48885	0.432768	11.6189	0.000500415	0.856666	0.000189547	0.32819
Dimethyl Phthalate	dimethylphthalate	131-11-3	283.7	120	18.6	10.8	4.9	4.70067e-05	1.5288	0.0043732	6.37582	0.000324549	0.645714	0.0232395	2.44489	0.174201	12.7798	0.429452	10.0249	0.000443189	0.739497	0.00016107	0.270532
Dimethyl Succinate	dimethylsuccinate	106-65-0	196.4	120	16.1	7.7	8.8	0.000144575	3.16876	0.00479507	6.91674	0.000316998	0.713562	0.0243834	2.57167	0.195031	15.025	0.977167	16.0181	0.000624725	1.05777	0.000253663	0.416001
Dimethyl Sulfate	dimethylsulfate	77-78-1	188	120	16.5	13	7	1.0168e-05	1.74116	0.001795	4.94172	0.000124908	0.702546	0.00507362	1.42286	0.0842976	18.2999	0.625375	16.9349	0.000471079	1.48661	0.000145872	0.52671
Dimethyl Sulfide	dimethylsulfide	75-18-3	37.3	36.3	16.1	6.4	7.4	5.70743e-05	0.000323629	0.061477	0.166194	0.0904561	0.2459	1.18418	2.12411	15.4188	20.7819	6.51699	9.21309	0.00613549	0.0192362	0.00190024	0.00599029
Dimethyl Sulfone	dimethylsulfone	67-71-0	238	120	19	19.4	12.3	0.000314435	2.27907	0.000174408	0.206112	2.60758e-06	0.00390534	8.32912e-05	0.00869276	6.40731e-05	0.00801794	0.0833417	1.63065	1.24257e-05	0.0140676	5.39735e-06	0.00617713
Dimethyl Sulfoxide (DMSO)	dimethylsulfoxide	67-68-5	189	120	18.4	16.4	10.2	1.2609	35.3303	0.00847349	5.2659	0.04174	8.27386	0.049	1.67906	1.45108	18.1951	8.39491	33.2395	0.0144771	3.04304	0.00789444	1.64717
Dioctyl Adipate	hexanedioicacid-dioctylester	123-79-5		25	16.7	2	5.1	2.22459e-05	2.22459e-05	0.0212678	0.0212678	3.16398e-05	3.16398e-05	0.352005	0.352005	0.182608	0.182608	0.231585	0.231585	0.000188972	0.000188972	6.41434e-05	6.41434e-05
Dipentene (Dl-Limonene)	dipentene	138-86-3	176	120	17.2	1.8	4.3	4.58338e-07	0.2041	0.0671876	35.8446	6.48417e-05	0.287731	1.59334	35.5504	0.567115	25.4263	0.191426	7.89513	0.000183687	0.515904	3.23602e-05	0.125661
Diphenyl Acetylene (0 Dipole Moment)	1,1'-(1,2-ethynediyl)bisbenzene	501-65-5	300	120	18	2	3.2	1.35289e-06	0.382659	0.0144649	16.4818	0.00119654	1.53386	0.152334	10.7071	0.634043	22.8019	0.216172	7.44808	0.00054129	0.885345	0.000114218	0.246898
Diphenyl Acetylene (P By Group Cont.)	1,1'-(1,2-ethynediyl)bisbenzene	501-65-5	300	120	18	2	3.2	1.35289e-06	0.382659	0.0144649	16.4818	0.00119654	1.53386	0.152334	10.7071	0.634043	22.8019	0.216172	7.44808	0.00054129	0.885345	0.000114218	0.246898
Diphenyl Ether	diphenylether	101-84-8	258	120	19.4	3.4	4	1.86057e-06	0.442716	0.0163487	18.5345	0.000970767	1.41513	0.186362	13.0038	0.775559	25.2938	0.274443	8.80101	0.000646601	1.03215	0.000143498	0.294339
Diphenyl Sulfone	diphenylsulfone	127-63-9		25	21.1	14.4	3.4	2.06915e-05	2.06915e-05	0.00297142	0.00297142	0.000314195	0.000314195	0.0126717	0.0126717	0.0755769	0.0755769	0.202895	0.202895	0.000291259	0.000291259	9.75425e-05	9.75425e-05
Diphenylamine	n-phenyl-benzeneamine	122-39-4	302	120	20	3.3	5.9	1.96022e-05	1.14471	0.00931369	12.4587	0.0107385	3.94204	0.0736465	6.48998	0.467135	21.4809	0.305432	9.23515	0.0159787	2.78474	0.00453189	0.921406
Diphenylmethane	diphenylmethane	101-81-5	265	120	19.5	1	1	1.59098e-06	0.444298	0.0192938	19.9647	0.0011601	1.61502	0.238414	14.6694	0.806536	25.4186	0.329107	9.56298	0.000553156	0.972039	0.000122105	0.276599
Dipropyl Amine	dipropylamine	142-84-7	109.3	108.3	15.3	1.4	4.1	0.696594	5.81896	0.0755668	22.8605	0.00053304	0.650105	1.73008	32.1363	1.02856	29.2939	0.847526	13.5429	0.00320604	1.01826	0.00178566	0.391075
Dipropyl Ketone	4-heptanone	123-19-3	144	120	15.8	7.6	4.9	0.000514054	3.70959	0.0465801	33.3573	0.00140832	2.0196	0.880585	31.5607	2.34658	39.0724	1.74483	22.1277	0.0020917	2.13531	0.000896067	0.795453
Dipropylene Glycol Mono n-Butyl Ether	dipropyleneglycoln-butylether	29911-28-2		25	15.7	6.5	10	0.00572366	0.00572366	0.0292279	0.0292279	0.000507969	0.000507969	0.489908	0.489908	0.851878	0.851878	1.20389	1.20389	0.00143031	0.00143031	0.000723165	0.000723165
Dipropylene Glycol Mono n-Propyl Ether	1-(1-methyl-2-propoxyethoxy)-2-propanol	29911-27-1		25	15.6	6.1	11	0.0114562	0.0114562	0.0259681	0.0259681	0.00108284	0.00108284	0.396887	0.396887	1.09327	1.09327	1.82256	1.82256	0.00220267	0.00220267	0.00117281	0.00117281
Dipropylene Glycol Monomethyl Ether Acetate	dpg-monomethyl-ether-acetate	88917-22-0	200	120	16.3	4.9	8	0.00806738	6.18036	0.0137956	12.6365	0.00112024	1.155	0.146223	7.56336	0.747243	21.0488	1.73609	17.2304	0.00176307	1.27018	0.000896466	0.539112
Divinylsulfide	1,1'-thiobisethene	627-51-0		25	16.5	4.6	5.6	3.45077e-06	3.45077e-06	0.029103	0.029103	0.0120497	0.0120497	0.380281	0.380281	4.27215	4.27215	1.12232	1.12232	0.00242215	0.00242215	0.000525407	0.000525407
Dodecane	dodecane	112-40-3	216.3	120	16	0	0	3.96817e-08	0.0421229	0.0635625	32.4561	3.8584e-07	0.00915868	1.43799	31.0711	0.0286538	4.05743	0.0235299	1.99908	9.88864e-06	0.0694214	1.21335e-06	0.0139405
Dodecanol	dodecanol	112-53-8	259	120	16	4	9.3	0.000250173	1.45677	0.0274965	21.3651	2.69978e-06	0.0649802	0.388038	16.7512	0.0166854	4.66383	0.0442778	3.93916	0.00280291	1.07296	0.00110325	0.374536
Dopamine	dopamine	51-61-6		25	18.2	10.3	19.5	0.00613432	0.00613432	0.00163235	0.00163235	5.84955e-05	5.84955e-05	0.00374589	0.00374589	0.000908188	0.000908188	0.028309	0.028309	3.21798	3.21798	1.53715	1.53715
Eicosane	eicosane	112-95-8	343	120	16.5	0	0	2.63825e-08	0.0276579	0.0413688	23.6549	1.60984e-07	0.00399551	0.846429	21.0303	0.0121854	1.72792	0.0142235	1.19745	5.26391e-06	0.0373153	6.48977e-07	0.00752287
Epichlorohydrin	(chloromethyl)-oxirane	106-89-8	116.11	115.11	17.5	7.6	7.6	7.45021e-05	2.44478	0.00200515	3.78537	0.000396899	1.2855	0.00518263	1.1729	0.0367479	10.0304	0.577574	16.2273	0.000521274	1.14945	0.000174484	0.416389
Epsilon-Caprolactam	caprolactam	105-60-2	270	120	19.4	13.8	3.9	0.0494172	18.3287	0.00909706	9.02239	0.000691996	1.62767	0.0600724	3.6679	0.106701	11.4088	1.13503	18.5852	0.00284839	1.87721	0.00156211	0.905762
Ethane	ethane	74-84-0	-88.6	-89.6	15.5	0	0	nan	1.30092e-25	nan	6.977e-08	nan	3.72819e-16	nan	0.00900214	nan	3.23985e-05	nan	2.45752e-06	nan	2.54626e-15	nan	1.31277e-16
Ethane (Liq. B.P.)	ethane	74-84-0	-88.6	-89.6	15.6	0	0	nan	1.30092e-25	nan	6.977e-08	nan	3.72819e-16	nan	0.00900214	nan	3.23985e-05	nan	2.45752e-06	nan	2.54626e-15	nan	1.31277e-16
Ethanesulfonylchloride	ethanesulfonylchloride	594-44-5	174	120	17.7	14.9	6.8	5.53142e-05	3.05202	0.00276286	6.35094	0.00100479	1.60387	0.0104266	2.07904	0.114657	18.2535	0.608195	16.3208	0.0151428	4.54555	0.00457915	1.6991
Ethanethiol (Ethyl Mercaptan)	ethanethiol	75-08-1	35.1	34.1	15.7	6.5	7.1	5.66521e-05	0.000236282	0.0560821	0.126922	0.138492	0.30429	1.02814	1.68068	15.576	19.9789	6.70983	8.96273	0.0150844	0.0352194	0.00447366	0.0105392
Ethanol	ethanol	64-17-5	78.2	77.2	15.8	8.8	19.4	0.0134713	1.76614	0.0124734	0.873345	2.38681e-05	0.0152413	0.0688397	1.01941	0.0142057	0.66993	0.176574	2.77467	0.0228956	0.945336	0.00992221	0.422882
Ethanolamine	ethanolamine	141-43-5	171	120	17	15.5	21	0.06189	27.1336	0.00649863	9.88015	0.00125446	4.83992	0.0272993	3.34271	0.0451674	15.8575	1.10087	28.3888	0.00447379	4.18094	0.00214889	1.9539
Ethyl Acetate	ethylacetate	141-78-6	77.1	76.1	15.8	5.3	7.2	0.00119283	0.281551	0.0288252	1.60342	0.00798528	0.536704	0.393072	4.2693	5.38722	24.9121	4.48558	16.28	0.00552913	0.368937	0.00256248	0.159182
Ethyl Aceto Acetate (Keto)	ethylacetoacetate	141-97-9	180.8	120	16.5	7.3	8.3	0.0002329	3.99986	0.00389884	5.42625	0.000334413	0.724531	0.0162719	1.70864	0.0976392	9.58473	0.862509	15.4132	0.000596485	0.927351	0.000250867	0.37565
Ethyl Acetylene	butyne	107-00-6	8	7	15.1	3.4	5	nan	2.20212e-06	nan	0.00864035	nan	0.0157933	nan	0.272589	nan	3.35524	nan	0.915933	nan	0.0138656	nan	0.0038174
Ethyl Acrylate	2-propenoicacidethylester	140-88-5	99.4	98.4	15.5	7.1	5.5	0.000223926	0.694507	0.0250745	6.50255	0.0030362	1.16922	0.320341	9.63177	2.94341	31.4906	1.82536	16.5961	0.00293255	0.975151	0.00115642	0.367719
Ethyl Amine	ethylamine	75-04-7	16.5	15.5	15	5.6	10.7	nan	22.1037	nan	0.0221531	nan	0.0271256	nan	0.465806	nan	1.9192	nan	5.05645	nan	0.080814	nan	0.0467392
Ethyl Amyl Ketone	3-octanone	106-68-3	167.5	120	16.2	4.5	4.1	0.000342402	2.65564	0.0449684	31.4857	0.000711471	1.20534	0.854839	29.5036	1.57192	33.9853	1.20993	18.2557	0.00142094	1.54961	0.000584995	0.555774
Ethyl Benzene	ethylbenzene	100-41-4	136.1	120	17.8	0.6	1.4	1.50179e-06	0.511164	0.0562549	38.2173	0.00117228	2.26617	1.16128	37.8108	2.32979	41.1575	0.500456	15.0942	0.000840574	1.62897	0.000169063	0.436646
Ethyl Benzoate	ethylbenzoate	93-89-0	212	120	17.9	6.2	6	5.24672e-05	1.46244	0.0184009	20.095	0.00108027	1.64378	0.220359	14.6866	1.14214	30.1259	0.627432	13.7613	0.00106451	1.39639	0.000360986	0.474382
Ethyl Bromide	bromoethane	74-96-4	38.5	37.5	16.5	8.4	2.3	2.99028e-06	2.80378e-05	0.0212226	0.0661115	0.0851825	0.249247	0.295098	0.604087	7.1254	10.9909	1.40814	2.36525	0.00195329	0.00720446	0.000447076	0.00171846
Ethyl Butyl Ether	1-ethoxybutane	628-81-9	92.3	91.3	14.5	3.9	4.7	0.000684163	0.254445	0.086108	9.43897	0.000350256	0.120984	2.20955	22.7187	1.98511	22.0847	0.957806	8.68385	0.00111327	0.240197	0.000438801	0.0802413
Ethyl Butyl Ketone	3-heptanone	106-35-4	147	120	16.2	5	4.1	0.000609025	3.95167	0.0452283	32.9523	0.00146757	2.09074	0.840451	30.9902	2.32899	39.0839	1.75928	22.256	0.00218902	2.18479	0.000949042	0.820473
Ethyl Butyrate	ethylbutyrate	105-54-4	121.5	120	15.5	5.6	5	0.000244329	3.25379	0.0398732	31.4631	0.00151045	2.1744	0.707748	29.2504	2.98373	40.5174	1.91241	23.1066	0.00223315	2.38817	0.000913361	0.889284
Ethyl Capronate	ethylhexanoate	123-66-0	167	120	15.5	3.2	5.9	0.000112171	1.69613	0.040794	29.1413	0.000417169	0.801472	0.769149	27.0488	1.4257	31.3228	0.97853	16.0377	0.0010587	1.27453	0.000400942	0.439806
Ethyl Carbamate	urethane	51-79-6	185	120	16.8	10.1	13	0.00160434	8.31334	0.00132127	2.35343	2.39516e-05	0.228781	0.00220591	0.394957	0.000568128	0.499082	0.0435829	4.35431	0.00189234	1.15907	0.000713455	0.470584
Ethyl Chloride	chloroethane	75-00-3	12.3	11.3	15.7	6.1	2.9	nan	7.65051e-07	nan	0.0131793	nan	0.0025461	nan	0.415715	nan	4.08717	nan	1.70498	nan	0.00104678	nan	0.000245983
Ethyl Chloroformate	carbonochloridicacidethylester	541-41-3	95	94	16.4	11	8	8.91454e-06	0.119027	0.0215683	4.7298	0.0014202	0.586143	0.281687	8.67432	2.72354	28.3751	1.49906	14.2613	0.00248782	0.788127	0.000667384	0.243717
Ethyl Cyanoacetate	cyanoaceticacidethylester	105-56-6	210	120	16.7	7.9	8.3	9.81477e-05	2.63096	0.000682554	1.54278	8.03584e-05	0.347987	0.000844815	0.223907	0.00175352	0.776005	0.101021	5.31397	0.000340338	0.419633	0.000122703	0.161012
Ethyl Ethynylether	ethoxyacetylene	927-80-0	53	52	15.4	7.9	5.9	2.90615e-05	0.00182722	0.0183872	0.209049	0.0160649	0.17685	0.167393	0.832471	2.25586	9.19237	1.34823	4.18726	0.0122572	0.116103	0.00347871	0.0345451
Ethyl Fluoride	fluoroethane	353-36-6	-37.6	-38.6	15.2	9.3	3	nan	2.71078e-11	nan	4.4617e-05	nan	1.44536e-05	nan	0.0211106	nan	0.625649	nan	0.315755	nan	1.00686e-06	nan	3.31017e-07
Ethyl Formate	ethylformate	109-94-4	54.4	53.4	15.5	8.4	8.4	0.000647515	0.0224266	0.0159863	0.190765	0.00500028	0.0744648	0.141643	0.678518	2.31062	9.07445	3.01087	7.98946	0.00562468	0.0737379	0.00238157	0.0307793
Ethyl Iodide	iodoethane	75-03-6	72.5	71.5	17.5	7	6	1.39479e-06	0.00217824	0.0140098	0.645542	0.0088994	0.450915	0.180582	2.10008	2.96368	15.1718	1.49249	7.16655	0.000682466	0.0552206	0.000149539	0.0140702
Ethyl Isocyanate	ethylisocyanate	109-90-0	60	59	15.4	12	2.5	9.69277e-06	0.00220022	0.0395375	0.689055	0.0112532	0.248096	0.622396	3.61807	7.83436	23.1275	2.11719	7.51469	0.00281767	0.0770995	0.000777005	0.0226235
Ethyl Isothiocyanate	ethylisothiocyanate	542-85-8	130	120	17.2	14.7	9	4.16953e-06	1.14789	0.0207429	31.272	0.0430855	14.896	0.226329	25.588	4.99416	50.7567	1.71906	28.2231	0.00169235	3.20889	0.000390412	0.962217
Ethyl Lactate	2-hydroxypropanoicacidethylester	97-64-3	154	120	16	7.6	12.5	0.0017406	6.47902	0.0189749	21.7755	0.000689958	1.85532	0.213116	15.7908	0.994911	35.2024	1.52541	23.4089	0.00544542	3.36752	0.00246212	1.39521
Ethyl Methacrylate	ethylmethacrylate	97-63-2	117	116	15.8	7.2	7.5	0.000199317	2.11195	0.0373142	24.45	0.0020544	2.21215	0.635061	25.6683	3.25705	39.3902	1.56244	20.3693	0.00222039	1.96629	0.000875297	0.716526
Ethyl Methyl Sulfide	(methylthio)-ethane	624-89-5	66.7	65.7	17.1	4.8	2.5	3.12174e-05	0.00892777	0.068254	1.6966	0.0202219	0.612756	1.4662	8.92915	9.76522	28.0997	3.5361	12.3556	0.00312519	0.128204	0.000916751	0.03882
Ethyl Oleate	ethyl-oleate	111-62-6		25	16.2	3.2	4	7.09295e-06	7.09295e-06	0.0302633	0.0302633	1.53091e-05	1.53091e-05	0.572357	0.572357	0.147924	0.147924	0.138374	0.138374	0.000110438	0.000110438	3.06539e-05	3.06539e-05
Ethyl Propionate	ethylpropionate	105-37-3	99.1	98.1	15.5	6.1	4.9	0.000457713	0.904959	0.0373726	8.11921	0.00323437	1.08534	0.621577	14.0142	4.36408	33.2464	2.84917	19.1024	0.00345212	1.00951	0.00148279	0.396232
Ethyl Thiocyanate	ethylthiocyanate	542-90-5	138	120	15.4	13.4	5.4	0.00011834	3.88516	0.00833092	14.6729	0.0383318	15.4493	0.0502896	6.49751	1.80429	44.5715	2.35824	29.7578	0.00150751	2.4894	0.000549167	0.920442
Ethyl Vinylether	ethoxy-ethene	109-92-2	35.5	34.5	14.9	4.9	5.6	3.33014e-05	0.000143758	0.0620346	0.143545	0.00572158	0.0147965	1.22918	2.00408	6.41916	9.52769	1.9368	2.8517	0.00368815	0.00970438	0.001047	0.00277932
Ethyl Vinylketone	1-penten-3-one	1629-58-9	38	37	15.8	11.3	4.5	0.0010142	0.00426424	0.0273325	0.0796032	0.00787521	0.024453	0.342243	0.649599	3.64811	6.26883	2.74486	4.18787	0.00436656	0.0136335	0.00190939	0.00584704
Ethylene	ethene	74-85-1	-103.7	-104.7	15	2	3.8	nan	2.62663e-26	nan	3.5244e-10	nan	6.62549e-12	nan	0.000115374	nan	0.00210503	nan	0.000193879	nan	2.03924e-14	nan	5.05033e-15
Ethylene Carbonate	1,3-dioxolan-2-one	96-49-1	248	120	18	21.7	5.1	3.73909e-05	1.72883	7.15205e-05	0.309303	5.5604e-07	0.0113276	2.05851e-05	0.0172416	3.68268e-05	0.0475269	0.0455335	2.72288	4.84123e-06	0.0452969	1.77364e-06	0.0179546
Ethylene Chlorohydrin	2-chloroethanol	107-07-3	128.6	120	16.9	8.8	17.2	0.00295786	11.5794	0.00228094	5.6006	7.20482e-05	0.911888	0.005774	1.43326	0.00593098	4.6808	0.208921	13.9567	0.0252415	5.10224	0.00915924	2.11005
Ethylene Cyanohydrin	ethylenecyanohydrin	109-78-4	221	120	17.2	18.8	17.6	0.000305917	1.94099	1.33383e-05	0.0657034	1.82804e-08	0.000736421	9.71522e-07	0.00109804	3.24087e-08	0.000193715	0.0015703	0.219167	4.88405e-05	0.0134171	1.56503e-05	0.00537131
Ethylene Dibromide	1,2-dibromoethane	106-93-4	131.6	120	19.2	3.5	8.6	2.51393e-06	0.453765	0.0032105	8.36505	0.0994802	10.022	0.016623	3.26879	1.23271	30.0309	0.338333	10.5654	0.00144899	1.4121	0.000329519	0.411538
Ethylene Dichloride	1,2-dichloroethane	107-06-2	83.5	82.5	18	7.4	4.1	3.92973e-05	0.103124	0.00402603	0.599438	0.00571566	0.690121	0.0177327	0.595579	0.197244	5.73558	0.933074	8.40789	0.00848638	0.727168	0.00221876	0.225777
Ethylene Dinitrate	1,2-ethanedioldinitrate	628-96-6	198.5	120	16.2	18	6	0.000248562	6.62742	0.0246103	15.4116	0.0820299	7.71171	0.452458	11.7192	15.1909	M	7.41168	28.2792	1.7948	16.3021	0.651859	10.0033
Ethylene Glycol	glycol	107-21-1	197.3	120	17	11	26	0.00341365	10.6063	0.000494141	0.937348	4.76276e-08	0.00425702	0.000363708	0.0803602	8.82399e-06	0.0197134	0.0120086	1.58107	0.00091578	0.403629	0.000336095	0.169559
Ethylene Glycol Butyl Ether Acetate	2-butoxyethanolacetate	112-07-2	192	120	15.3	7.5	6.8	0.000463986	3.38656	0.0190894	18.0591	0.000734907	1.10717	0.233683	12.7539	0.856651	25.9427	1.29238	17.366	0.00138831	1.42773	0.00060181	0.551961
Ethylene Glycol Diacetate	1,2-ethanedioldiacetate	111-55-7	190	120	16.2	4.7	9.8	0.000320963	4.02864	0.00394553	5.28052	0.000337176	0.664478	0.0174892	1.72752	0.140316	10.8509	0.970247	15.251	0.000614776	0.89693	0.000266507	0.368596
Ethylene Glycol Dibutyl Ether	1,2-dibutoxyethane	112-48-1	203.3	120	15.7	4.5	4.2	0.00185679	2.71129	0.0406557	26.7206	0.000304279	0.506499	0.793554	24.4522	0.848444	23.6239	0.897019	13.121	0.000983111	0.880756	0.000462682	0.321582
Ethylene Glycol Diethyl Ether	3,6-dioxaoctane	629-14-1	119.4	118.4	15.4	5.4	5.2	0.0101408	8.14549	0.0428746	28.008	0.00372899	2.93829	0.791348	27.2038	3.54329	39.6486	3.25601	25.1217	0.00436064	2.56402	0.0023161	1.08185
Ethylene Glycol Dimethyl Ether	1,2-dimethoxyethane	110-71-4	85	84	15.4	6.3	6	0.0255048	2.47141	0.0364688	3.06431	0.0230277	1.67428	0.569848	6.94273	7.01123	30.0447	7.56582	22.6745	0.0108241	0.819784	0.00599403	0.398354
Ethylene Glycol Mono 2-Ethyl Hexyl Ether	2-(2-ethylhexyl)oxyethanol	1559-35-9		25	16	4.1	10.5	0.000512779	0.000512779	0.0324082	0.0324082	3.99159e-05	3.99159e-05	0.529189	0.529189	0.168591	0.168591	0.248621	0.248621	0.00119674	0.00119674	0.000505685	0.000505685
Ethylene Glycol Mono Benzyl Ether	ethylenglycolmonobenzylether	622-08-2	256	120	17.8	5.9	12.2	0.00101512	4.06262	0.00865639	11.2101	0.000418265	1.19498	0.0615099	5.42974	0.149794	15.8334	0.433081	12.4124	0.00264565	1.68652	0.00110859	0.65237
Ethylene Glycol Mono Ethyl Ether Acrylate	2-ethoxyethylacrylate	106-74-1	174	120	15.9	5.1	9.3	0.000360667	3.47669	0.0140608	15.8171	0.0010533	1.57295	0.137988	9.72414	0.810849	27.6275	1.16826	17.8259	0.0014676	1.64538	0.000608733	0.632696
Ethylene Glycol Mono n-Hexyl Ether	2-hexyloxyethanol	112-25-4	208	120	16	5	11.4	0.00104918	3.15874	0.0318199	25.9943	5.97231e-05	0.388003	0.488146	22.2577	0.202588	19.8007	0.358227	11.9439	0.00201159	1.45286	0.000914779	0.540829
Ethylene Glycol Mono n-Propyl Ether	2-propoxyethanol	2807-30-9	149.8	120	16.1	8.7	13.5	0.00365716	8.10995	0.029426	28.189	0.000252241	1.37308	0.393781	23.2919	0.419133	31.9358	0.839587	20.6787	0.00558311	3.46649	0.00271738	1.44479
Ethylene Glycol Mono t-Butyl Ether	ethyleneglycoltert-butylether	7580-85-0		25	15.3	6.1	10.8	0.00456049	0.00456049	0.0315299	0.0315299	0.000424826	0.000424826	0.462345	0.462345	0.638428	0.638428	1.17005	1.17005	0.00353694	0.00353694	0.00175755	0.00175755
Ethylene Glycol Monobutyl Ether	2-butoxyethanol	111-76-2	168.4	120	16	5.1	12.3	0.00244048	5.91346	0.0303998	27.4159	0.00014558	0.859391	0.42846	23.0275	0.31226	27.2334	0.606741	17.0821	0.00379691	2.52323	0.0018136	1.00875
Ethylene Glycol Monoethyl Ether	ethoxyethanol	110-80-5	135	120	15.9	7.2	14	0.00673491	11.9366	0.0269088	28.0864	0.000528022	2.46985	0.328877	22.1313	0.594143	37.0891	1.27702	25.4611	0.0081188	4.83647	0.0040537	2.13519
Ethylene Glycol Monoethyl Ether Acetate	2-ethoxyethanolacetate	111-15-9	156.4	120	15.9	4.7	10.6	0.000957111	5.71054	0.014993	15.7711	0.0017124	2.07589	0.150312	9.56294	1.14209	30.1403	2.1235	22.2693	0.00197177	1.97201	0.000906457	0.81213
Ethylene Glycol Monoisopropyl Ether	2-isopropoxyethanol	109-59-1	154	120	16	8.2	13.1	0.00562272	9.44742	0.0295	28.5306	0.000563073	2.01036	0.399772	23.8256	0.68383	35.8681	1.29811	23.6849	0.00513254	3.49121	0.00255454	1.48156
Ethylene Glycol Monomethyl Ether	2-methoxyethanol	109-86-4	124.1	120	16	8.2	15	0.00958495	16.3891	0.0164498	20.6912	0.000380437	2.44797	0.138613	12.0232	0.269843	31.3856	1.16156	26.2552	0.0118382	6.1812	0.00574783	2.86571
Ethylene Glycol Monomethyl Ether Acetate	ethyleneglycolmonomethyletheracetate	110-49-6	143	120	15.9	5.5	11.6	0.00122597	7.18594	0.0114389	12.6703	0.00234968	2.56074	0.0935438	6.44255	1.03984	29.5942	2.61271	24.3818	0.00200261	2.07793	0.000939536	0.881304
Ethylene Glycol Sulfite	ethylenesulfite	3741-38-6		25	20	15.9	5.1	4.3875e-05	4.3875e-05	0.000901875	0.000901875	0.000135586	0.000135586	0.00156227	0.00156227	0.0459594	0.0459594	0.897519	0.897519	0.000268872	0.000268872	9.48044e-05	9.48044e-05
Ethylene Oxide	ethyleneoxide	75-21-8	10.6	9.6	15.6	10	11	nan	0.000769422	nan	0.00765577	nan	0.0502535	nan	0.177214	nan	10.9233	nan	9.04001	nan	0.00481435	nan	0.00235752
Ethylene Sulfide	thiirane	420-12-2	55	54	19.3	9	6.5	4.84637e-05	0.00357745	0.018055	0.247108	0.106013	1.251	0.160923	0.933203	7.12413	21.8716	4.70635	12.3112	0.00445859	0.0779311	0.00133566	0.0242956
Ethylenediamine	1,2-diaminoethane	107-15-3	117	116	16.6	8.8	17	18.2937	M	0.00587469	4.76232	0.00372938	6.23951	0.0215337	1.41804	0.028676	5.58565	1.56635	26.1346	0.010943	3.0291	0.00547529	1.57857
Ethyleneimine	aziridine	151-56-4	56	55	17.7	11	9.8	6.76095	13.3035	0.0219719	0.285267	0.0642834	1.1603	0.180144	0.88021	1.51936	8.62015	4.52257	13.1808	0.0464835	0.461687	0.0246641	0.245421
Eugenol	eugenol	97-53-0	253.2	120	19	7.5	13	0.000925985	2.10917	0.0136817	16.8195	0.00217623	1.71027	0.135049	10.8929	0.352984	22.7052	0.314998	10.8265	1.27063	4.84834	0.540783	1.9124
Ferulic Acid	ferulic_acid	1135-24-6		25	19	6.6	15.1	0.00997055	0.00997055	0.00174801	0.00174801	5.72732e-05	5.72732e-05	0.00479388	0.00479388	0.00335411	0.00335411	0.0376516	0.0376516	6.28866	6.28866	3.65431	3.65431
Fluorene	fluorene	86-73-7	295	120	21.3	1.7	1.7	1.59339e-06	0.447441	0.0180958	19.7932	0.00136879	1.82673	0.21845	14.4859	0.850803	26.2699	0.310962	9.43468	0.000601346	1.03547	0.000131302	0.293623
Fluorobenzene	fluorobenzene	462-06-6	84.7	83.7	18.1	6.1	2	4.22878e-06	0.024709	0.0319435	3.22872	0.0078798	0.99322	0.487387	8.56889	3.29123	25.2458	0.613401	6.51369	0.00292528	0.424907	0.0006303	0.111616
Fluoroethylene	fluoroethene	75-02-5	-72	-73	15.2	7	1	nan	5.4501e-17	nan	3.84483e-08	nan	3.37449e-07	nan	0.00011111	nan	0.00996593	nan	0.00296005	nan	3.05258e-08	nan	6.55677e-09
Fluoromethane	ch3f	593-53-3	-78.4	-79.4	13.4	10.6	9.5	nan	6.71716e-18	nan	7.22243e-09	nan	2.08329e-08	nan	2.9145e-05	nan	0.014353	nan	0.0353133	nan	4.06321e-11	nan	1.86058e-11
Fluoroprene	2-fluoro-1,3-butadiene	381-61-3		25	14.2	5.8	1	6.25492e-06	6.25492e-06	0.0542104	0.0542104	0.0154997	0.0154997	1.0282	1.0282	6.52932	6.52932	1.01225	1.01225	0.00599117	0.00599117	0.00128029	0.00128029
Formaldehyde	formaldehyde	50-00-0	-19.1	-20.1	12.8	14.4	15.4	nan	2.98141e-07	nan	2.37169e-05	nan	0.000170967	nan	0.000441134	nan	0.139159	nan	1.27407	nan	5.94384e-06	nan	2.57618e-06
Formamide	formamide	75-12-7		25	17.2	26.2	19	0.000207459	0.000207459	3.93314e-06	3.93314e-06	6.03235e-10	6.03235e-10	1.05398e-07	1.05398e-07	2.5035e-10	2.5035e-10	0.000115058	0.000115058	1.6305e-07	1.6305e-07	5.41871e-08	5.41871e-08
Formic Acid	formicacid	64-18-6	101	100	14.6	10	14	0.557259	18.9037	0.000161211	0.114966	3.54982e-06	0.00583272	6.25847e-05	0.00905896	3.45601e-05	0.0109816	0.0141298	0.707941	nan	31.4572	nan	22.8779
Formyl Fluoride	formylfluoride	1493-02-3	-26.5	-27.5	15	10.1	8.6	nan	1.70849e-07	nan	2.02699e-06	nan	0.000300036	nan	2.86196e-05	nan	0.00171514	nan	0.0141527	nan	0.267617	nan	0.0652689
Fumaronitrile	(e)-2-butenedinitrile	764-42-1	186	120	16.7	13.6	7.8	3.03844e-05	1.51116	3.9209e-05	0.278301	4.00545e-05	0.316665	6.46881e-06	0.0125828	7.95499e-06	0.0358512	0.00473836	0.996029	4.56953e-05	0.0960643	1.45152e-05	0.0351359
Furan	furane	110-00-9	31.5	30.5	17	1.8	5.3	2.23381e-05	5.74205e-05	0.0210196	0.0357857	0.0316737	0.0531337	0.21977	0.31278	4.91728	6.5263	1.29471	1.68012	0.0161904	0.0271697	0.00412283	0.0070301
Furfural	furfural	98-01-1	161.7	120	18.6	14.9	5.1	0.000352291	4.85187	0.00132876	3.06757	0.000197433	0.869907	0.0025346	0.627556	0.0150981	5.31971	0.192545	10.1319	0.000511876	0.919637	0.000197901	0.363728
Furfuryl Alcohol	2-furanmethanol	98-00-0	171	120	17.4	7.6	15.1	0.00245565	8.66518	0.0021402	4.23691	9.33552e-05	0.64496	0.00529018	0.998491	0.00587444	2.89818	0.0849349	6.75454	0.0724117	4.99739	0.0255541	2.0833
Glycerol	glycerol	56-81-5		25	17.4	11.3	27.2	0.00291908	0.00291908	0.000717787	0.000717787	1.36942e-07	1.36942e-07	0.000797292	0.000797292	5.31262e-05	5.31262e-05	0.0295922	0.0295922	0.00135236	0.00135236	0.00051603	0.00051603
Glycerol Carbonate	4-hydroxymethyl-1,3-dioxolan-2-one	931-40-8	353.9	120	17.9	25.5	17.4	0.000381457	2.308	5.73003e-05	0.216941	5.31138e-08	0.00180532	1.48004e-05	0.0102294	3.61461e-06	0.00732587	0.0102361	0.907991	0.000613721	0.0895644	0.000200841	0.0359117
Glycerol Triacetate	glycerol-triacetate	102-76-1		25	16.5	4.5	9.1	0.000170688	0.000170688	0.00267979	0.00267979	0.000120648	0.000120648	0.0105545	0.0105545	0.0526969	0.0526969	0.511017	0.511017	0.000337217	0.000337217	0.000143357	0.000143357
Glycerol Tributyrate	glycerol-tributyrate	60-01-5		25	16.3	2.5	7	6.85907e-05	6.85907e-05	0.00973834	0.00973834	0.000139227	0.000139227	0.0960712	0.0960712	0.203388	0.203388	0.451461	0.451461	0.000510554	0.000510554	0.000198327	0.000198327
Glycerol Trioleate	triolein	122-32-7		25	16	3.8	3.2	2.13664e-06	2.13664e-06	0.0136077	0.0136077	5.38872e-06	5.38872e-06	0.221426	0.221426	0.0418694	0.0418694	0.0566495	0.0566495	5.17037e-05	5.17037e-05	1.36121e-05	1.36121e-05
Glycidol	oxiranemethanol	556-52-5		25	18.2	9	17.9	0.00445262	0.00445262	0.00217261	0.00217261	2.66137e-05	2.66137e-05	0.0048723	0.0048723	0.0049812	0.0049812	0.23979	0.23979	0.00854852	0.00854852	0.00346666	0.00346666
Glycidyl Methacrylate	glycidylmethacrylate	106-91-2	189	120	16.3	8.5	5.7	0.000160996	3.05369	0.00764048	10.2096	0.000843968	1.41061	0.0511536	4.64683	0.393453	21.7866	0.931874	16.3133	0.000936813	1.33015	0.000375299	0.513165
Glyoxal (Ethandial)	ethanedial	107-22-2	50.4	49.4	15	17	13.3	3.85285e-05	0.00180607	0.000666102	0.00884464	6.43475e-05	0.00133327	0.000753326	0.00588676	0.0243402	0.17907	0.458569	1.60731	0.000442344	0.00688635	0.000141819	0.00232988
HCFC 134a	1,1,1,2-tetrafluoroethane	811-97-2	-26	-27	16.1	4	0	nan	2.00069e-09	nan	5.25197e-06	nan	8.62313e-06	nan	0.000145365	nan	8.114e-05	nan	0.00155816	nan	0.000188736	nan	4.03853e-05
HCFC 141b	1,1-dichloro-1-fluoroethane	1717-00-6	32	31	15.7	4	1	2.98824e-06	8.79905e-06	0.042183	0.0720084	0.00143942	0.0026678	0.882784	1.20498	1.74281	2.38092	0.692607	0.914183	0.0026389	0.00475818	0.000519151	0.000961034
HCFC 225ca	1,1-dichloro-2,2,3,3,3-pentafluoropropane	422-56-0		25	14.9	3.5	1	6.28863e-05	6.28863e-05	0.0140122	0.0140122	0.00140572	0.00140572	0.166493	0.166493	0.024677	0.024677	0.0412275	0.0412275	0.243613	0.243613	0.0642838	0.0642838
HCFC 225cb	1,3-dichloro-1,1,2,2,3-pentafluoropropane	507-55-1		25	13.1	2.9	1	6.60243e-05	6.60243e-05	0.0145837	0.0145837	0.00231195	0.00231195	0.180954	0.180954	0.0449676	0.0449676	0.0593184	0.0593184	0.250789	0.250789	0.0660574	0.0660574
HCFC 253eb	3-chloro-1,1,1-trifluoropropane	460-35-5	45.1	44.1	14.6	7.3	1	9.1264e-06	0.000200771	0.0122799	0.0699627	0.00152892	0.00938949	0.118601	0.365314	0.169912	0.558057	0.272032	0.679533	0.00394777	0.0209219	0.000898467	0.00509473
HCFC123	1,1-dichloro-2,2,2-trifluoroethane	306-83-2	27	26	15	5.4	1	0.00152381	0.00169556	0.0233193	0.0255547	0.306108	0.314549	0.370634	0.391325	0.534415	0.564144	0.300155	0.314847	6.11822	6.11704	3.40351	3.39282
Heptane	n-heptane	142-82-5	98.5	97.5	15.3	0	0	6.67679e-08	0.00627724	0.108465	15.27	1.36226e-06	0.00464815	2.85633	29.3102	0.097369	5.20803	0.0458513	1.68924	2.36934e-05	0.0323589	2.89133e-06	0.00597729
Hexachlorobenzene	hexachlorobenzene	118-74-1	325	120	20.3	2.1	0	6.47121e-08	0.0508528	0.0172478	16.2446	3.98354e-06	0.0411353	0.263716	13.3359	0.0777878	7.30625	0.0672017	3.52676	2.05195e-05	0.103408	3.10835e-06	0.0236275
Hexachloroethane	hexachloroethane	67-72-1		25	18.6	2	0	5.15615e-08	5.15615e-08	0.0190729	0.0190729	1.49547e-06	1.49547e-06	0.291793	0.291793	0.0356551	0.0356551	0.0680217	0.0680217	1.4723e-05	1.4723e-05	2.12096e-06	2.12096e-06
Hexadecane	n-hexadecane	544-76-3	286.8	120	16.3	0	0	3.16409e-08	0.0331922	0.0496171	27.1547	2.35809e-07	0.00567843	1.05562	24.945	0.0175464	2.46144	0.0176992	1.4886	6.91097e-06	0.048489	8.51723e-07	0.00976847
Hexafluoro Isopropanol	hexafluoro-i-propanol	920-66-1	59	58	17.2	4.5	14.7	nan	nan	0.000784268	0.0188217	nan	14.1342	0.00133439	0.0140356	0.000213207	0.00397708	0.00763876	0.0617581	nan	nan	nan	nan
Hexafluoro-1,3-Butadiene	hexafluoro-1,3-butadiene	685-63-2	5	4	13.8	0	0	nan	2.55943e-10	nan	0.000703484	nan	7.70712e-09	nan	0.00938059	nan	0.000107431	nan	0.000533497	nan	9.01932e-08	nan	1.13771e-08
Hexafluorobenzene	hexafluorobenzene	392-56-3	80.2	79.2	16	0	0	8.99619e-08	0.000598395	0.00782863	0.6493	2.61892e-06	0.00101687	0.061271	1.02819	0.00710523	0.197329	0.00830651	0.15993	1.04003e-05	0.00290495	1.64664e-06	0.000593102
Hexamethyl Benzene	hexamethylbenzene	87-85-4	263.4	120	19.2	1.6	0	5.48087e-07	0.206688	0.0525042	31.0489	9.06271e-05	0.318496	1.16079	30.0046	0.578875	22.8639	0.19933	7.35868	0.000174713	0.460634	3.31146e-05	0.116285
Hexamethylenetetramine	methenamine	100-97-0		25	19.4	7	16	0.832454	0.832454	0.00715162	0.00715162	0.0127914	0.0127914	0.0448485	0.0448485	0.29668	0.29668	2.80708	2.80708	0.00461933	0.00461933	0.0024844	0.0024844
Hexamethylphosphoramide	hexamethylphosphoramide	680-31-9	232.5	120	18.5	11.6	8.7	0.529869	16.4257	0.0294345	21.3184	0.0111716	3.66884	0.510736	17.9254	3.57944	32.1303	4.89306	22.739	0.0110609	2.63263	0.00726543	1.33838
Hexanal	hexanal	66-25-1	131	120	15.8	8.4	5.3	0.000339949	4.23737	0.0388828	32.9321	0.0019451	2.99314	0.633962	29.991	2.42739	42.5689	1.89925	25.2046	0.00261708	2.88685	0.00105372	1.08236
Hexane	hexane	110-54-3	68.7	67.7	14.9	0	0	7.84922e-08	0.000146332	0.128799	3.11122	2.09706e-06	0.000392266	3.56877	16.1821	0.148302	1.86359	0.056912	0.578028	3.1666e-05	0.00343279	3.85206e-06	0.000550348
Hexane 1,6 Diol	1,6-hexanediol	629-11-8	250	120	15.7	8.4	17.8	0.00268605	7.81165	0.00362325	4.41424	4.44219e-07	0.0245433	0.0118103	1.119	0.000337756	0.301322	0.0257934	2.81194	0.00225012	1.03209	0.000948948	0.436539
Hexanoic Acid	n-hexanoicacid	142-62-1	205.2	120	16.3	4.2	11.5	0.0278343	12.4562	0.0133333	14.2785	6.15784e-05	0.466044	0.108046	7.45528	0.0255133	6.708	0.117306	7.58844	10.8269	17.5513	7.40335	10.7243
Hexyl Acetate	n-hexylacetate	142-92-7	171.5	120	15.8	2.9	5.9	0.000180589	2.10142	0.0378592	28.0549	0.000501686	0.904999	0.681176	25.5126	1.40763	31.3623	1.09983	16.8763	0.00124113	1.38676	0.000496046	0.494733
HFC 245fa	1,1,1,3,3-pentafluoropropane	460-73-1		25	15.4	3	0	3.70391e-05	3.70391e-05	0.002155	0.002155	0.000560336	0.000560336	0.00669508	0.00669508	0.00248851	0.00248851	0.0324942	0.0324942	0.00842905	0.00842905	0.00210925	0.00210925
HFC 338pcc	1,1,2,2,3,3,4,4-octafluorobutane	377-36-6		25	13.7	0	0	0.000146774	0.000146774	0.00173777	0.00173777	0.000897939	0.000897939	0.00526346	0.00526346	0.000581607	0.000581607	0.0077336	0.0077336	0.127546	0.127546	0.034758	0.034758
HFC-365mfc	1,1,1,3,3-pentafluorobutane	406-58-6	40	39	16.4	0	0	1.3683e-05	0.000126485	0.00314489	0.0124357	0.000353472	0.00142027	0.0129486	0.0338304	0.00865797	0.0244637	0.0727717	0.153133	0.00199591	0.00662652	0.000498121	0.00172356
HFC-43-10mee	1,1,1,2,2,3,4,5,5,5-decafluoropentane	138495-42-8		25	11.6	0	0	4.97053e-05	4.97053e-05	0.00120406	0.00120406	2.30071e-05	2.30071e-05	0.00290215	0.00290215	2.38012e-05	2.38012e-05	0.00114331	0.00114331	0.0366662	0.0366662	0.0101518	0.0101518
HFE 7000	heptafluoro-1-methoxypropane	375-03-1		25	13	4.2	1	1.19211e-07	1.19211e-07	0.00626859	0.00626859	8.23574e-07	8.23574e-07	0.0420873	0.0420873	0.001254	0.001254	0.00593631	0.00593631	1.28079e-05	1.28079e-05	2.06557e-06	2.06557e-06
HFE 7100	1,1,1,2,2,3,3,4,4-nonafluoro-5-oxahexane	163702-07-6		25	13.7	2.2	1	4.90125e-08	4.90125e-08	0.00430768	0.00430768	1.39294e-07	1.39294e-07	0.0240155	0.0240155	0.000266789	0.000266789	0.00232861	0.00232861	3.50011e-06	3.50011e-06	5.34438e-07	5.34438e-07
Hydrazine	hydrazine	302-01-2	113.5	112.5	14.2	8.3	8.9	20.4473	nan	0.00891837	1.80258	1.14116	10.2695	0.0369039	0.371553	0.542707	2.68716	6.19918	20.3012	0.10058	2.49715	0.049898	1.39124
Hydrogen Cyanide	hcn	74-90-8	26	25	12.3	17.6	9	0.00395042	0.00395042	5.54893e-05	5.54893e-05	0.00662124	0.00662124	8.43673e-06	8.43673e-06	2.73697e-05	2.73697e-05	0.00815377	0.00815377	0.848777	0.848777	0.238565	0.238565
Hydrogen Peroxide	h2o2	7722-84-1	152	120	15.5	12.2	42.7	2.5109	32.5074	9.27949e-05	0.076034	1.0894e-06	0.000329712	2.46503e-05	0.00133342	3.16443e-06	0.00026725	0.00562209	0.220679	nan	23.5091	nan	16.883
Hydrogen Sulfide	h2s	7783-06-4	-60.33	-61.33	17.9	6	10.2	nan	2.66367e-11	nan	1.64951e-08	nan	0.0584462	nan	2.39871e-06	nan	0.0480239	nan	0.401261	nan	0.00677546	nan	0.00155096
Hydroxyethyl Acrylate	2-propenoicacid-2-hydroxyethylester	818-61-1	191	120	16	13.2	13.4	0.00176701	7.10269	0.00342787	5.2892	7.43655e-05	0.45647	0.0122129	1.54292	0.0235848	5.42874	0.281729	10.7215	0.00521103	1.92056	0.00220334	0.807735
Indene	1h-indene	95-13-6	182	120	18.7	2.6	9	2.37123e-06	0.680187	0.028831	29.923	0.00290372	3.75695	0.416024	26.3886	1.9689	38.7142	0.551043	15.1513	0.00108934	1.90154	0.000240086	0.545724
Indole	indole	120-72-9	254	120	20.5	7.5	6.5	0.00035171	5.13804	0.00400339	7.483	0.116126	11.1173	0.0166168	2.48419	0.195706	20.0639	0.350592	11.9974	0.557322	10.282	0.183007	4.53623
Iodobenzene	iodobenzene	591-50-4	188.4	120	19.9	5.6	6.1	5.26885e-07	0.197353	0.00782971	13.0847	0.000900808	1.42285	0.0694721	7.73794	0.513973	22.5457	0.281186	9.06247	0.000210735	0.49169	4.15136e-05	0.130548
Iodoform	triiodomethane	75-47-8	218	120	20.2	3.6	10.6	4.73377e-07	0.0560714	0.000577956	1.43446	0.000132944	0.179737	0.00139891	0.325399	0.0156405	3.23297	0.130681	4.883	0.000140211	0.0732554	3.1657e-05	0.0199706
Isoamyl Acetate	isoamylacetate	123-92-2	142.5	120	15.3	3.1	7	0.000286631	2.8698	0.0374312	29.1824	0.000956636	1.4906	0.652746	26.5321	1.98169	35.6602	1.43892	19.7287	0.00175893	1.8395	0.00073099	0.679461
Isoamyl Alcohol (3-Methyl-1-Butanol)	isopentanol	123-51-3	131.1	120	15.8	5.2	13.3	0.00261948	9.00841	0.0223243	23.0494	1.26928e-05	0.375966	0.217829	14.9489	0.0217025	9.8195	0.107348	9.78079	0.0144453	4.85332	0.0062337	2.04533
Isoamyl Propionate	1-butanol-3-methylpropanoate	105-68-0	160.2	120	15.7	5.2	5.6	0.00011342	1.64829	0.0424516	29.7077	0.000422249	0.800441	0.817756	27.7945	1.45903	31.3782	0.939181	15.6708	0.00103089	1.23799	0.000391399	0.425494
Isobutyl Acetate	aceticacid-2-methylpropylester	110-19-0	116.5	115.5	15.1	3.7	6.3	0.00041012	2.78709	0.0387752	23.3586	0.00175882	1.83696	0.671984	24.6782	2.77364	37.4647	1.99525	21.5399	0.00245493	1.92154	0.00105691	0.735254
Isobutyl Acrylate	2-propenoicacid-2-methylpropylester	106-63-8	132	120	15.5	6.2	5	0.000108889	2.02785	0.0354543	29.2289	0.000964176	1.60254	0.593466	26.4229	1.83206	35.9772	0.997667	17.7881	0.00159106	1.80918	0.000590307	0.632474
Isobutyl Alcohol	isobutanol	78-83-1	107.8	106.8	15.1	5.7	15.9	0.00363263	5.14512	0.022836	10.3138	1.97708e-05	0.197362	0.213929	9.44645	0.0225737	5.97662	0.109763	6.94431	0.0360208	4.28821	0.0148412	1.83953
Isobutyl Formate	isobutylformate	542-55-2	98.2	97.2	15.5	6.5	6.7	0.000234489	0.635254	0.0301071	6.77972	0.00155278	0.696223	0.426745	11.0348	1.87698	27.6201	1.53931	15.2673	0.00365685	0.96046	0.00144055	0.361996
Isobutyl Isobutyrate	isobutylisobutyrate	97-85-8	148.6	120	15.1	2.8	5.8	0.000103008	1.52273	0.0474522	31.01	0.000365225	0.704497	0.977819	29.6477	1.45584	31.0856	0.931812	15.332	0.000923061	1.14008	0.000351254	0.388242
Isobutylene	isobutene	115-11-7	-6.9	-7.9	14.5	2	1.5	nan	1.49958e-09	nan	0.00718607	nan	2.48363e-05	nan	1.07314	nan	1.17264	nan	0.159896	nan	2.09763e-05	nan	3.47727e-06
Isobutyleneoxide	2,2-dimethyl-oxirane	558-30-5	52	51	16.1	4.8	5.8	0.00272548	0.0437281	0.0581851	0.497907	0.0219729	0.205535	1.13873	3.81634	10.6007	21.6111	6.39309	12.4046	0.00971926	0.0947843	0.00463651	0.0426667
Isobutyric Acid	isobutyricacid	79-31-2	154.4	120	15.7	5.4	10.5	0.0548371	18.864	0.00923186	11.3738	5.78452e-05	0.553666	0.0548449	4.62085	0.0181403	5.82256	0.134383	8.79514	14.7717	22.8463	10.6084	14.977
Isocyanic Acid	isocyanicacid	75-13-8		25	15.8	10.5	13.6	0.020099	0.020099	0.00181926	0.00181926	3.47309	3.47309	0.00362975	0.00362975	0.250628	0.250628	0.437148	0.437148	22.1148	22.1148	16.1658	16.1658
Isooctyl Alcohol	isooctanol	26952-21-6	186	120	14.4	7.3	12.9	0.000816284	3.64753	0.0263407	22.8876	6.00042e-06	0.156104	0.322769	16.9647	0.0208176	7.13381	0.0692207	6.22469	0.00594411	2.28296	0.00248553	0.870399
Isopentane	methylbutane	78-78-4	27.8	26.8	13.8	0	0	1.02747e-07	1.49263e-07	0.160215	0.186696	4.41838e-06	5.67677e-06	4.74217	5.10714	0.28266	0.318751	0.0796441	0.0890284	5.13687e-05	6.45566e-05	6.28593e-06	8.00577e-06
Isophorone	isophorone	78-59-1	215.2	120	17	8	5	0.00579	8.21935	0.0259937	22.109	0.00365905	2.97011	0.369584	17.0917	1.89466	33.3344	2.72353	23.0067	0.00331108	2.24789	0.00173557	0.97184
Isoprene (2-Methyl-1,3-Butadiene)	isoprene	78-79-5	34	33	14.7	1.4	4.1	2.26303e-06	9.96206e-06	0.100727	0.201048	0.00335886	0.00765288	2.50147	3.64652	6.23577	8.7527	0.940879	1.36287	0.00185875	0.00434695	0.000366222	0.000885344
Isopropyl Acetate	isopropylacetate	108-21-4	88.6	87.6	14.9	4.5	8.2	0.000603406	0.423618	0.0364848	4.07717	0.00350963	0.576058	0.595185	9.15084	4.17896	27.2674	2.90875	15.6261	0.00364267	0.53446	0.00160508	0.214735
Isopropyl Amine (2-Propan Amine)	isopropylamine	75-31-0	31.7	30.7	14.8	4.4	6.6	11.1126	11.6502	0.0537713	0.0896615	0.0142776	0.0268636	0.845092	1.14201	1.84808	2.70108	3.26009	4.17425	0.0509467	0.078809	0.030144	0.0464356
Isopropyl Benzene (Cumene)	isopropylbenzene	98-82-8	152.4	120	18.1	1.2	1.2	1.05819e-06	0.381048	0.0551901	35.8933	0.000557611	1.26998	1.15681	35.1826	1.54856	35.7535	0.362623	12.0145	0.000566142	1.14678	0.000109836	0.299186
Isopropyl Chloride (2-Chloro Propane)	2-chloropropane	75-29-6	35.7	34.7	15	8	2	5.64015e-06	3.22082e-05	0.0579627	0.136789	0.00314542	0.00869754	1.20266	1.98834	4.6142	7.17331	1.87401	2.80221	0.00223056	0.00626537	0.000528449	0.00152857
Isopropyl Ether	diisopropylether	108-20-3	68.5	67.5	15.1	3.2	3.2	0.00242534	0.0757886	0.0824153	2.09211	0.000434706	0.0226304	2.05974	10.8274	1.9853	11.2455	1.05551	4.62211	0.00145941	0.0528924	0.000630354	0.0195048
Isopropyl Palmitate	hexadecanoicacidisopropylester	142-91-6		25	16.2	3.9	3.7	5.17683e-06	5.17683e-06	0.0337443	0.0337443	7.68415e-06	7.68415e-06	0.66936	0.66936	0.111101	0.111101	0.109023	0.109023	7.78156e-05	7.78156e-05	2.08117e-05	2.08117e-05
Isovaleraldehyde	3-methylbutanal	590-86-3	92.5	91.5	14.7	9.5	5	0.000551122	0.661053	0.0413391	5.9823	0.00465933	1.03136	0.674356	12.193	4.19435	32.0502	3.43572	19.6779	0.0041026	0.829102	0.00175746	0.328921
Isovaleric Acid	isovalericacid	503-74-2	176.5	120	16.4	4.1	10.7	0.04435	15.8397	0.0108562	12.7204	6.53218e-05	0.536527	0.0742515	5.82175	0.0194196	6.08052	0.115172	7.93958	13.6881	20.8894	9.88885	13.465
Isoxazole	iso-oxazole	288-14-2	95	94	18.8	13.4	11.2	0.000458114	0.746532	0.00104501	0.491674	0.00105979	0.659414	0.00152809	0.159784	0.0104072	1.57263	0.147963	4.4487	0.00128224	0.363738	0.000437006	0.13448
Ketene	ethenone	463-51-4	-49.8	-50.8	15.4	7.3	5.8	nan	8.57743e-13	nan	1.87323e-06	nan	1.5701e-05	nan	0.000858726	nan	0.256988	nan	0.0355689	nan	2.15423e-05	nan	4.96947e-06
l-Tyrosine	tyrosine	60-18-4		25	17.5	6.9	17.2	5.36686e-05	5.36686e-05	3.94288e-06	3.94288e-06	1.82007e-12	1.82007e-12	1.63183e-07	1.63183e-07	4.89061e-11	4.89061e-11	1.5161e-05	1.5161e-05	9.68e-08	9.68e-08	3.111e-08	3.111e-08
Lactic Acid (dl)	lacticacid	50-21-5		25	17	8.3	28.4	0.0103465	0.0103465	0.000113795	0.000113795	4.61601e-08	4.61601e-08	3.93255e-05	3.93255e-05	1.69512e-06	1.69512e-06	0.00444189	0.00444189	2.49867	2.49867	0.806546	0.806546
m-Chloroaniline	3-chlorobenzeneamine	108-42-9	230.5	120	20.2	7.3	9.8	0.000428767	5.34551	0.00449755	8.21919	0.0695305	10.3877	0.0213817	3.00249	0.217723	20.5583	0.429319	13.6184	0.120514	8.56261	0.0361272	3.54386
m-Cresol	3-hydroxytoluene	108-39-4	202.2	120	18.5	6.5	13.7	1.15411	21.3839	0.00773353	11.8993	0.268383	10.3927	0.0453493	5.11236	0.0873712	17.6614	0.181773	11.0482	nan	nan	nan	24.4004
m-Dichlorobenzene	1,3-dichlorobenzene	541-73-1	173	120	19.2	5.1	2.7	2.268e-06	0.488543	0.0287879	27.7183	0.00149549	1.91923	0.483282	25.797	1.46242	32.2918	0.389069	12.1738	0.00223251	1.90294	0.000447072	0.519275
Maleic Anhydride	maleicanhydride	108-31-6	202	120	19.5	13.3	11.9	3.15959e-05	2.35871	0.000222178	0.984952	1.86472e-05	0.17042	0.00015208	0.116119	0.00244873	1.57734	0.0920521	6.51165	0.000662351	0.91975	0.000209039	0.333948
Malononitrile	dicyanomethane	109-77-3	218.5	120	17	18.4	6.7	4.75095e-05	1.28361	3.2172e-06	0.0365492	3.88385e-06	0.0229486	9.79702e-08	0.000430569	2.62256e-08	0.000343653	0.000354295	0.134512	5.90169e-05	0.0271373	1.73524e-05	0.00989032
Menthofuran	4,5,6,7-tetrahydro-3,6-dimethylbenzofuran	494-90-6		25	17.2	4.6	5.6	1.22756e-06	1.22756e-06	0.0501339	0.0501339	0.000137967	0.000137967	1.08232	1.08232	0.774072	0.774072	0.283604	0.283604	0.00039521	0.00039521	8.19058e-05	8.19058e-05
Mesityl Oxide	4-methyl-3-penten-2-one	141-79-7	130	120	16.4	7.2	5	0.00232163	7.67931	0.0340303	30.6524	0.00781502	6.14901	0.512652	26.5982	4.16078	45.7045	3.00714	28.3949	0.00437529	3.62395	0.00207746	1.49668
Mesitylene	1,3,5-trimethylbenzene	108-67-8	164.7	120	18	0.6	0.6	9.24574e-07	0.350966	0.059853	36.5414	0.000439876	1.0982	1.31323	36.1046	1.47947	35.3658	0.361489	11.905	0.000458547	1.02014	8.88306e-05	0.264594
Methacrylaldehyde	alpha-methylacrolein	78-85-3	68.4	67.4	15	10.3	7.1	0.000991825	0.123097	0.0245072	0.808421	0.0156861	0.583305	0.273051	2.36968	4.98819	22.4351	3.82573	13.5936	0.00570335	0.227826	0.00251371	0.0960693
Methacrylamide	2-methyl-2-propenamide	79-39-0		25	15.8	11	11.6	0.00310105	0.00310105	0.000982795	0.000982795	3.36228e-05	3.36228e-05	0.00129888	0.00129888	0.000405949	0.000405949	0.0407827	0.0407827	0.000589431	0.000589431	0.00023562	0.00023562
Methacrylic Acid	methacrylicacid	79-41-4	163	120	15.8	2.8	12	0.0881915	20.5757	0.00665645	9.41269	0.000160029	1.03871	0.0320935	3.35055	0.0175464	6.37522	0.0930766	7.77579	nan	26.7764	15.7299	18.7449
Methacrylonitrile	2-methyl-2-propenenitrile	126-98-7	90.3	89.3	15.8	9.5	5.4	0.000222385	0.432039	0.0124999	2.20761	0.0512935	5.99966	0.0851031	2.46224	1.75492	26.8296	2.06709	16.6932	0.00210748	0.527736	0.000817217	0.201962
Methane (Liquid B.P.)	methane	74-82-8	-161.5	-162.5	14	0	0	nan	nan	nan	2.98459e-19	nan	nan	nan	3.91751e-08	nan	7.61477e-13	nan	1.91187e-14	nan	nan	nan	nan
Methanol	methanol	67-56-1	64.6	63.6	14.7	12.3	22.3	0.019638	0.835944	0.0046388	0.126187	5.76846e-06	0.000866969	0.0120756	0.101574	0.0019558	0.0377158	0.0993088	0.806893	0.0156831	0.251037	0.0063237	0.108351
Methanol Cluster	methanol	67-56-1	64.6	63.6	14.7	5	10	0.019638	0.835944	0.0046388	0.126187	5.76846e-06	0.000866969	0.0120756	0.101574	0.0019558	0.0377158	0.0993088	0.806893	0.0156831	0.251037	0.0063237	0.108351
Methoxyhexanone (Pentoxone)	4-methoxy-4-methyl-pentan-2-one	107-70-0	160	120	15.3	6	5.9	0.00194857	6.74502	0.0220838	20.8225	0.00236177	2.45245	0.27783	14.965	1.58055	32.9626	2.53118	23.3856	0.0025483	2.18102	0.00123517	0.912116
Methyl Acetate	methylacetate	79-20-9	56.8	55.8	15.5	7.2	7.6	0.00140072	0.0509512	0.0193158	0.264784	0.0116307	0.173186	0.195369	0.967504	4.87437	14.895	5.36285	12.2539	0.00596281	0.0939634	0.00275363	0.0419697
Methyl Aceto Acetate	methylacetoacetate	105-45-3	171.7	120	16.4	8.6	8.9	0.000202811	3.91544	0.00195129	3.08186	0.000165041	0.424449	0.0050339	0.689919	0.0319627	4.18906	0.656261	13.1437	0.000289203	0.580403	0.000121142	0.237438
Methyl Acetylene	propyne	74-99-7	-23.2	-24.2	15.1	3.8	9.2	nan	5.04592e-09	nan	6.84408e-05	nan	0.00122784	nan	0.0041729	nan	0.18348	nan	0.186936	nan	0.000584988	nan	0.00016377
Methyl Acrylate	methylacrylate	96-33-3	80.2	79.2	15.3	6.7	9.4	0.000285948	0.165989	0.0161465	1.34079	0.00405882	0.453095	0.150031	2.53604	2.39102	21.0996	2.02281	11.996	0.00316497	0.331253	0.0012585	0.128627
Methyl Amine	methylamine	74-89-5	-6.3	-7.3	14.4	7	16	nan	nan	nan	0.00181582	nan	0.00518871	nan	0.087416	nan	0.438484	nan	2.20445	nan	0.0294743	nan	0.0144608
Methyl Amyl Acetate	4-methyl-2-pentylacetate	108-84-9	147.5	120	15.2	3.1	6.8	0.000159485	1.85943	0.040764	29.2182	0.000490702	0.881282	0.765523	27.0744	1.46901	31.5031	0.996095	16.0829	0.00114253	1.30662	0.000447803	0.457224
Methyl Benzoate	methylbenzoate	93-58-3	199	120	18.9	8.2	4.7	5.01845e-05	1.69119	0.0133838	17.8115	0.00126474	2.01853	0.127814	11.2539	0.995543	31.4243	0.640475	14.8412	0.00115615	1.63264	0.000387317	0.562084
Methyl Bromide	ch3br	74-83-9	3.5	2.5	17	8.8	2.6	nan	3.75719e-08	nan	0.000740028	nan	0.0280613	nan	0.012612	nan	1.54802	nan	0.416586	nan	0.000132188	nan	2.87385e-05
Methyl Butyl Ketone	2-hexanone	591-78-6	127.6	120	15.3	6.1	4.1	0.0014156	6.74593	0.0395545	32.4083	0.0034539	3.93959	0.653675	29.3398	3.14698	43.7514	2.78405	27.6948	0.00362148	3.25246	0.00167539	1.31433
Methyl Chloride	ch3cl	74-87-3	-24	-25	15.3	9.9	3.9	nan	3.00774e-10	nan	7.62229e-05	nan	8.18504e-05	nan	0.0073836	nan	0.365577	nan	0.390648	nan	1.30234e-05	nan	2.9085e-06
Methyl Chloroformate	carbonochloridicacidmethylester	79-22-1	70.5	69.5	16.3	9.5	8.5	1.8553e-05	0.0135636	0.0122996	0.573141	0.00264332	0.173448	0.11145	1.45638	2.42192	16.7375	1.79074	9.03347	0.00526511	0.27026	0.00145376	0.0828786
Methyl Cyanoacetate	cyanoaceticacidmethylester	105-34-0	200.5	120	16.9	14.9	9.9	4.49558e-05	1.68269	0.000132865	0.484235	5.67705e-06	0.0577908	5.41401e-05	0.0341474	6.25714e-05	0.076548	0.0278408	2.1921	3.98238e-05	0.1008	1.38528e-05	0.0386396
Methyl Cyclohexane	methylcyclohexane	108-87-2	100.9	99.9	16	0	1	7.5702e-08	0.00942948	0.111782	17.749	1.64024e-06	0.00725432	3.0768	32.0998	0.116229	7.36785	0.0514976	2.12152	2.83189e-05	0.0472919	3.48837e-06	0.00889622
Methyl Cyclopentane	methylcyclopentane	96-37-7	71.8	70.8	16	0	1	9.62777e-08	0.000277179	0.133888	3.93981	2.78932e-06	0.000726067	3.86571	18.7159	0.181952	2.74694	0.0681468	0.794277	4.10008e-05	0.0058723	5.08328e-06	0.000972644
Methyl Ethyl Ether	methylethylether	540-67-0	7.4	6.4	14	4.7	6	nan	0.00151893	nan	0.0205589	nan	0.00388797	nan	1.29505	nan	9.35317	nan	4.15655	nan	0.0024597	nan	0.00132645
Methyl Ethyl Ketone (MEK)	butanone	78-93-3	79.5	78.5	16	9	5.1	0.0046285	0.843741	0.0347995	2.25202	0.0210693	1.44648	0.489353	5.7429	6.92981	30.871	6.49638	21.782	0.0091954	0.65978	0.0045721	0.301364
Methyl Ethyl Ketoxime	2-butanoneoxime	96-29-7	152.5	120	14.7	4.9	7.8	0.011778	14.0185	0.0118586	15.496	0.000258321	1.68752	0.0795586	7.34481	0.0250452	9.37484	0.126963	9.75819	3.44034	15.9118	1.57029	8.7965
Methyl Formate	methylformate	107-31-3	31.7	30.7	15.3	8.4	10.2	0.000675264	0.00148839	0.00624264	0.0109102	0.00331225	0.00605076	0.0286577	0.0417104	0.779625	1.11598	2.52227	3.17706	0.00332763	0.00597712	0.0013852	0.00248997
Methyl Furoate	methyl2-furancarboxylate	611-13-2	181.3	120	17.4	6.9	9.7	0.000154122	3.11619	0.00478281	8.3967	0.000591145	1.4637	0.023259	3.19365	0.19265	21.1797	0.431065	13.8364	0.00150856	1.74465	0.000559291	0.658292
Methyl Glyoxal	methylglyoxal	78-98-8	72	71	15.5	16.1	9.7	7.66518e-05	0.040466	0.00309565	0.192078	0.000514946	0.0504671	0.0096727	0.177109	0.242358	3.74109	1.28965	7.36835	0.000770406	0.069887	0.000283187	0.0265539
Methyl Hydrazine	methylhydrazine	60-34-4	87.5	86.5	16.2	8.7	14.8	8.5982	28.8397	0.00764617	0.990143	0.0112671	2.89326	0.0308209	0.665706	0.0728444	3.58302	2.12403	18.3485	0.0148041	1.11901	0.00739131	0.580578
Methyl Hydroperoxide	methylhydroperoxide	3031-73-0	86	85	15	15	30	0.0903073	6.07535	0.0010415	0.193779	2.02285e-05	0.0125363	0.00128382	0.0544535	0.000571589	0.0616186	0.0897294	1.76202	19.4644	16.618	13.2586	9.50236
Methyl Iodide	ch3i	74-88-4	42.5	41.5	17.5	7.7	5.3	1.64539e-06	3.08029e-05	0.00661926	0.0317118	0.0154363	0.0728929	0.0539213	0.156998	2.1782	5.16425	1.66965	3.19132	0.000664061	0.00389323	0.000149097	0.000926085
Methyl Isoamyl Ketone	5-methyl-2-hexanone	110-12-3	144	120	16	5.7	4.1	0.00092398	4.85664	0.0383577	30.5475	0.00179556	2.40492	0.641821	27.4402	2.11596	38.5619	1.95305	23.2571	0.00248677	2.36269	0.00111501	0.917871
Methyl Isobutyl Carbinol	4-methyl-2-pentanol	108-11-2	131.6	120	15.4	3.3	12.3	0.00141703	5.62519	0.0304363	27.9649	1.76129e-05	0.385344	0.382963	22.188	0.0420232	14.5247	0.117063	9.94517	0.00949442	3.62149	0.0039828	1.42332
Methyl Isobutyl Ketone (MIBK)	4-methyl-2-pentanone	108-10-1	116.5	115.5	15.3	6.1	4.1	0.00106852	4.34358	0.0418078	25.5277	0.00287048	2.77985	0.713302	27.0618	2.9715	40.836	2.50472	24.8899	0.00336123	2.47487	0.00151357	0.978234
Methyl Isocyanate	isocyanatomethane	624-83-9	39.5	38.5	15.6	11.5	2.5	1.78612e-05	0.000185065	0.0183888	0.0663762	0.0249024	0.0953962	0.170428	0.402917	6.50412	12.1017	2.55436	4.49911	0.00308371	0.0135965	0.000914416	0.00412606
Methyl Isopropenyl Ketone	3-methyl-3-buten-2-one	814-78-8	98	97	15.9	12.1	4.5	0.00143618	1.60872	0.0301334	6.81616	0.00991282	2.52551	0.402361	10.6394	4.6221	36.3978	3.29473	21.7179	0.00501637	1.30891	0.00229532	0.544869
Methyl Isothiocyanate	methylisothiocyanate	556-61-6	119	118	17.3	16.2	10.1	7.74862e-06	1.63481	0.00538299	13.3038	0.0862667	19.8462	0.0239298	5.7671	1.50117	49.7909	1.42822	29.1674	0.0013699	3.23342	0.000344811	1.02196
Methyl Mercaptan	methanethiol	74-93-1	5.9	4.9	16.6	7.7	8.6	nan	4.83231e-06	nan	0.00388239	nan	0.103818	nan	0.09711	nan	8.453	nan	5.64076	nan	0.00378566	nan	0.0012037
Methyl Methacrylate	methylmethacrylate	80-62-6	100.5	99.5	15.8	6.5	5.4	0.00022183	0.742293	0.0278259	7.54191	0.00324133	1.30023	0.381367	11.4709	3.44161	33.2024	1.92296	17.262	0.00294994	1.04981	0.00116288	0.393974
Methyl n-Amyl Ketone	2-heptanone	110-43-0	151	120	16.2	5.7	4.1	0.000892638	4.67837	0.0406784	31.2751	0.00167848	2.28847	0.706618	28.5484	2.20904	38.7909	1.93892	23.1329	0.00242074	2.31319	0.00108373	0.893271
Methyl n-Propyl Ketone	2-pentanone	107-87-9	102.2	101.2	16	7.6	4.7	0.00272281	2.90867	0.0387905	10.3166	0.0082951	2.69687	0.610969	15.7308	4.85911	38.4931	4.31851	25.2315	0.00586049	1.75231	0.00283407	0.750409
Methyl Nitrate	methylnitrate	598-58-3	65	64	15.8	14	4.8	3.99089e-05	0.015065	0.0197085	0.591564	0.00968623	0.385149	0.243414	2.29282	13.3141	30.1804	5.68175	16.3648	0.0516214	1.2413	0.0139358	0.396964
Methyl Oleate	methyloleate	112-62-9		25	16.2	3.8	4.5	7.04636e-06	7.04636e-06	0.0295546	0.0295546	2.12895e-05	2.12895e-05	0.545594	0.545594	0.174548	0.174548	0.158161	0.158161	0.000138298	0.000138298	3.84233e-05	3.84233e-05
Methyl Phenyl Sulfide	methylthiobenzene	100-68-5	193	120	19.6	4.8	4.7	2.7254e-06	0.69538	0.014436	20.5992	0.00411407	4.23194	0.137537	13.4229	1.2589	34.9204	0.682468	16.2152	0.000820738	1.51601	0.000191719	0.4479
Methyl Phenyl Sulfone (Uncertain)	methylphenylsulfone	3112-85-4		25	20	16.9	7.8	9.44655e-05	9.44655e-05	0.000962532	0.000962532	7.77699e-05	7.77699e-05	0.00174729	0.00174729	0.00658082	0.00658082	0.164066	0.164066	0.000159945	0.000159945	6.16409e-05	6.16409e-05
Methyl Propionate	methylpropionate	554-12-1	79.8	78.8	15.5	6.5	7.7	0.000630253	0.245494	0.0294924	2.01183	0.00558097	0.510052	0.407749	5.14168	4.89793	25.9039	3.69093	15.7472	0.00466889	0.406295	0.00203145	0.166381
Methyl Salicylate	2-hydroxy-benzoicacidmethylester	119-36-8	222.9	120	18.1	8	13.9	1.69677e-05	1.06026	0.0156596	19.9348	0.000727735	1.35051	0.176278	14.636	1.38576	32.1951	0.5862	14.1066	0.0015942	1.87071	0.000461887	0.607701
Methyl Silane	methylsilane	992-94-9	-57.5	-58.5	15.5	3.3	0	nan	1.50202e-17	nan	2.05263e-05	nan	7.51738e-11	nan	0.151894	nan	0.0294148	nan	0.00243404	nan	5.21402e-10	nan	4.43665e-11
Methyl Sulfolane	3-methyl-tetrahydrothiophene-1,1-dioxide	872-93-5	276	120	19	17.4	5.3	0.000714138	5.88324	0.00280355	2.98352	0.000331442	0.456887	0.00969157	0.714773	0.0482199	3.40295	1.23299	14.4596	0.00044989	0.523033	0.000211765	0.230015
Methyl Thiocyanate	methylthiocyanate	556-64-9	132.9	120	17.3	15	6	9.09378e-05	3.98103	0.00241961	6.24473	0.0168552	14.3291	0.00625704	1.62222	0.288052	37.4955	1.35408	27.9572	0.000547312	1.57247	0.000195464	0.580352
Methyl Vinyl Ether	methylvinylether	107-25-5	5.5	4.5	14.9	5.3	6.3	nan	2.03215e-06	nan	0.00552998	nan	0.0019707	nan	0.185837	nan	2.86071	nan	1.27795	nan	0.000631931	nan	0.000191761
Methyl Vinyl Ketone	1-buten-3-one	78-94-4	81.4	80.4	15.6	12.5	5	0.00247526	0.71491	0.0157825	1.36403	0.0142596	1.28782	0.131694	2.16711	2.82384	23.3948	3.86311	17.9042	0.0048965	0.479875	0.00230417	0.213354
Methyl-p-Toluate	4-methyl-benzoicacidmethylester	99-75-2	220	120	19	6.5	3.8	5.11401e-05	1.47956	0.0176901	19.6227	0.00102431	1.57863	0.20623	14.0644	1.10928	29.9323	0.656294	14.0334	0.00106829	1.41141	0.000362474	0.481136
Methyl-t-Butyl Ether	methyl-t-butylether	1634-04-4	55.2	54.2	14.8	4.3	5	0.00618053	0.0666397	0.0863701	0.884598	0.00186081	0.0271391	2.17247	7.34206	4.35948	12.8708	2.23525	5.67753	0.00366138	0.0439	0.00174619	0.0186092
Methylal (Dimethoxy Methane)	dimethoxymethane	109-87-5	42	41	15	1.8	8.6	0.00389167	0.02157	0.0393993	0.157299	0.0143999	0.0609806	0.617722	1.38303	7.24146	12.688	5.60309	8.72427	0.00850616	0.0363177	0.00405142	0.0167143
Methylene Dichloride (Dichloromethane)	ch2cl2	75-09-2	40	39	17	7.3	7.1	0.000326203	0.00238234	0.0194024	0.0702077	0.331982	0.815363	0.234714	0.533229	4.62424	8.45342	2.70167	4.61247	0.858131	1.69228	0.238529	0.512779
Methylene Diiodide (Diiodomethane)	diiodomethane	75-11-6	182	120	22	3.9	5.5	1.39116e-06	0.188803	0.00106258	2.98032	0.00216628	1.50823	0.00335288	0.806989	0.0850951	13.6127	0.366018	9.71003	0.000491167	0.367467	0.000110833	0.103121
Morpholine	morpholine	110-91-8	128	120	18	4.9	11	0.814532	23.5649	0.0172121	20.404	0.0038672	6.59349	0.161142	12.3147	0.673473	37.3024	2.44194	29.782	0.00823782	4.76657	0.00439809	2.25773
N,N,N,N-Tetramethylthiourea	tetramethylthiourea	2782-91-4	245	120	17.3	6	10.5	0.000372226	4.56938	0.010944	11.1593	0.0113683	5.71686	0.0887775	5.30318	1.06933	27.2049	2.78658	23.4285	0.00114867	1.39289	0.000509561	0.564017
N,N-Dibutyl Formamide	n,n-dibutylformamide	761-65-9		25	15.5	8.9	6.2	0.0115289	0.0115289	0.0317095	0.0317095	0.00206334	0.00206334	0.519321	0.519321	1.57558	1.57558	2.10452	2.10452	0.0030577	0.0030577	0.00171272	0.00171272
N,N-Dichloroethyl Amine	2-chloro-n-(2-chloroethyl)ethanamine	334-22-5		25	16.8	7.6	7.7	0.00382322	0.00382322	0.00858862	0.00858862	0.000864874	0.000864874	0.0638213	0.0638213	0.213162	0.213162	0.738953	0.738953	0.00120613	0.00120613	0.000406751	0.000406751
N,N-Diethyl Acetamide	diethylacetamide	685-91-6	185.5	120	16.4	11.3	7.5	0.130351	19.9847	0.0288362	23.682	0.0207969	7.75917	0.414256	18.4271	4.71382	42.1971	6.06079	30.9027	0.0121191	4.33178	0.0073373	2.18244
N,N-Diethyl Formamide	n,n-diethylformamide	617-84-5	177.5	120	16.4	11.4	9.2	0.0647188	20.5614	0.0253574	22.2181	0.024739	9.45507	0.322069	15.8548	4.53847	44.0151	6.45746	33.4881	0.0112257	4.81461	0.00653254	2.41218
N,N-Dimethyl Acetamide	n,n-dimethylacetamide	127-19-5	165	120	16.8	11.5	9.4	0.296217	29.1401	0.0255404	20.666	0.110106	15.9959	0.317029	13.8024	8.03968	48.3241	11.2342	39.5519	0.0252597	7.13475	0.0151224	3.90031
N,N-Dimethyl Butyramide	n,n-dimethylbutanamide	760-79-2	186	120	16.4	10.6	7.4	0.052276	16.2607	0.0309273	25.5753	0.0134824	6.55434	0.466294	20.9368	4.13772	41.7699	4.78748	29.2049	0.00854037	3.8218	0.00498905	1.82133
N-(2-Hydroxyethyl)-2-Pyrrolidone	1-(2-hydroxyethyl)-2-pyrrolidinone	3445-11-2	295	120	18	9.2	15.7	0.0547891	15.7216	0.0088898	8.08869	0.00426844	2.64548	0.0647151	3.38183	0.719839	19.748	3.63145	23.7072	0.00336016	1.80567	0.00181696	0.851579
N-Acetyl Piperidine	1-acetylpiperidine	618-42-8	226.5	120	18.5	10	6.5	0.109056	18.4624	0.0271948	22.0225	0.0161965	6.34967	0.399414	17.0288	3.95072	38.806	5.85656	29.0528	0.0104312	3.79205	0.00630526	1.89563
N-Acetylmorpholine	4-acetylmorpholine	1696-20-4	245.5	120	18.3	9.8	7.8	0.0323393	15.66	0.00788064	7.31315	0.00395489	2.59723	0.0523235	2.86159	0.557974	17.8069	3.19854	22.8064	0.00301146	1.6874	0.00162263	0.802885
n-Butyl Acetate	n-butylacetate	123-86-4	126.1	120	15.8	3.7	6.3	0.000395653	3.90978	0.0367982	30.1064	0.00170475	2.34566	0.619955	27.2782	2.81897	40.2027	2.08681	23.8238	0.0025059	2.51447	0.00107122	0.964349
n-Butyl Aceto Acetate	3-oxobutanoicacidbutylester	591-60-6		25	16.6	5.8	7.3	0.000173084	0.000173084	0.00779574	0.00779574	0.000381448	0.000381448	0.053559	0.053559	0.206425	0.206425	0.824681	0.824681	0.000902994	0.000902994	0.000367649	0.000367649
n-Butyl Acrylate	2-propenoicacidbutylester	141-32-2	145	120	15.6	6.2	4.9	0.000100037	2.01056	0.0343249	28.7394	0.000906919	1.54599	0.564498	25.7635	1.87985	36.1856	1.04468	18.1938	0.00162638	1.85938	0.000597528	0.650163
n-Butyl Amine	1-butylamine	109-73-9	77	76	16.2	4.5	8	11.567	17.9333	0.052155	2.73391	0.00591081	0.770169	0.852755	8.52168	1.17567	17.7041	2.39199	14.303	0.0318121	0.972319	0.0197607	0.547433
n-Butyl Butyrate	butylbutyrate	109-21-7	166	120	15.6	2.9	5.6	9.41319e-05	1.58297	0.0428915	29.7271	0.000399629	0.767783	0.83276	27.8762	1.45003	31.3542	0.976762	15.9282	0.00100589	1.23481	0.000377467	0.42293
n-Butyl Cyclohexane	butylcyclohexane	1678-93-9	180.9	120	16.2	0	0.6	4.97642e-08	0.0535228	0.0760015	36.6104	6.31705e-07	0.0152129	1.84845	36.2673	0.0464108	6.892	0.0305648	2.65797	1.42877e-05	0.10131	1.7589e-06	0.0204136
n-Butyl Cyclopentane	butylcyclopentane	2040-95-1	156.6	120	16.4	0	1	5.68259e-08	0.0603604	0.0842663	39.0748	7.88214e-07	0.0186329	2.09408	39.0447	0.055873	8.36845	0.035434	3.04965	1.70298e-05	0.119199	2.10344e-06	0.024041
n-Butyl Methacrylate	2-methyl-2-propenoicacidbutylester	97-88-1	160	120	15.4	5.9	5.2	8.20971e-05	1.4325	0.0425813	30.0329	0.000530759	0.961637	0.822437	28.2524	1.67178	32.8408	0.837605	15.2091	0.00103382	1.2728	0.000375724	0.42774
n-Butyl Propionate	n-butylpropionate	590-01-2	146.8	120	15.7	5.5	5.9	0.000175241	2.32758	0.0422302	30.7317	0.000755326	1.26266	0.796071	28.8344	2.08528	35.8785	1.3769	19.2924	0.00152334	1.71205	0.000604652	0.612741
n-Butylbenzene	butylbenzene	104-51-8	183.3	120	17.4	0.1	1.1	7.77429e-07	0.296423	0.0552949	34.0993	0.000257451	0.704058	1.18629	33.2016	1.00296	30.2769	0.275478	9.7676	0.000379465	0.820749	7.11824e-05	0.209238
n-Butyramide	butanamide	541-35-5		25	16.9	13.7	12.3	0.0060654	0.0060654	0.00206334	0.00206334	1.56436e-05	1.56436e-05	0.00432727	0.00432727	0.000491238	0.000491238	0.0394301	0.0394301	0.000903441	0.000903441	0.00037997	0.00037997
N-Ethyl Formamide	n-formylethylamine	627-45-2		25	16.2	10	14	0.0115802	0.0115802	0.00295797	0.00295797	0.000100263	0.000100263	0.00778964	0.00778964	0.00578024	0.00578024	0.234762	0.234762	0.00122858	0.00122858	0.000571992	0.000571992
N-Ethyl-2-Pyrrolidone	n-ethyl-2-pyrrolidinone	2687-91-4		25	18	12	7	0.144657	0.144657	0.0270914	0.0270914	0.0363714	0.0363714	0.382693	0.382693	5.68701	5.68701	8.09616	8.09616	0.0149112	0.0149112	0.00901813	0.00901813
N-Formyl Piperidine	1-piperidinecarboxaldehyde	2591-86-8	222.5	120	18.7	10.6	7.8	0.0623425	19.2418	0.0233971	20.1395	0.0201675	7.81566	0.301739	14.0893	3.81778	40.1792	6.2661	31.2604	0.00992551	4.17134	0.00578628	2.08091
n-Heptyl Acetate	aceticacidheptylester	112-06-1	193	120	15.8	2.9	5.5	0.000112262	1.51785	0.0379468	27.1709	0.000285575	0.586201	0.696651	24.6636	1.01064	27.2567	0.79944	14.0713	0.000874269	1.04867	0.000332773	0.360356
N-Methyl Acetamide	n-methylacetamide	79-16-3	205	120	16.9	17	13	0.0495882	22.8363	0.00401827	4.37972	0.000282865	1.01205	0.0129922	1.02859	0.0165533	3.05146	0.506463	13.9002	0.00156156	1.27359	0.000794886	0.609083
N-Methyl Formamide	methylformamide	123-39-7	199.5	120	17.4	18.8	15.9	0.0108879	16.2559	0.00099504	1.39607	3.57675e-05	0.19748	0.00120621	0.156673	0.000723674	0.264974	0.121104	5.55829	0.000340645	0.376227	0.000152501	0.169829
N-Methyl Pyrrolidine	1-methyl-pyrrolidine	120-94-5	81	80	16.8	2.8	6.7	1.69965	3.64976	0.110015	6.01696	0.00292022	0.27156	3.1214	21.4373	4.31753	25.0475	2.27509	10.687	0.00692288	0.323912	0.0042681	0.143573
N-Methyl-2-Pyrrolidone (NMP)	n-methyl-2-pyrrolidinone	872-50-4	202	120	18	12.3	7.2	0.253359	26.7422	0.0253051	19.5331	0.0889716	13.5041	0.331842	13.2229	7.32326	45.03	10.9023	37.1189	0.0226247	6.1796	0.0136258	3.34503
N-Methylaniline	n-methylaniline	100-61-8	196.2	120	19.5	6	7.8	4.79944e-05	2.49931	0.0128996	19.4415	0.0172135	8.2202	0.107036	11.3559	0.778904	34.7647	0.726819	18.0037	0.0138404	4.71422	0.00418903	1.67568
N-n-Butyl Pyrrolidone	n-butyl-2-pyrrolidinone	3470-98-2		25	17.5	9.9	5.8	0.0525725	0.0525725	0.0290474	0.0290474	0.00815349	0.00815349	0.450519	0.450519	2.97569	2.97569	4.37395	4.37395	0.00674327	0.00674327	0.00403504	0.00403504
n-Pentyl Propionate	amylpropionate	624-54-4	168.6	120	15.8	5.2	5.7	0.000116647	1.68055	0.0423782	29.5712	0.000407386	0.778872	0.816578	27.6481	1.4531	31.3688	0.984822	15.9854	0.00104311	1.25145	0.000397367	0.431489
n-Propyl Acetate	n-propylacetate	109-60-4	101.5	100.5	15.3	4.3	7.6	0.000667717	1.33118	0.0346656	8.85528	0.00358757	1.34586	0.547594	13.7926	4.06704	33.9901	3.06113	20.5724	0.00378046	1.21449	0.00168534	0.489927
n-Propyl Nitrate	propylnitrate	627-13-4	110	109	15.8	11.3	4.1	5.64097e-06	0.454276	0.0407498	19.2446	0.000959051	1.26354	0.780523	27.5891	6.39893	42.6803	1.88239	22.237	0.0041359	2.88323	0.00102477	0.908999
n-Propyl Propanoate	propylpropionate	106-36-5	122.5	120	15.5	5.6	5.7	0.000270489	3.28455	0.0418355	32.0582	0.00151879	2.15597	0.765889	30.1363	3.13192	40.7376	1.98064	23.2568	0.00225874	2.38539	0.000932229	0.889504
n-Tetradecane	tetradecane	629-59-4	253.5	120	16.2	0	0	3.47188e-08	0.0367534	0.0554606	29.4807	2.8557e-07	0.00690458	1.21157	27.6147	0.0214613	3.03896	0.0199334	1.68991	7.98708e-06	0.0563884	9.80928e-07	0.0113345
Naphthalene	naphthalene	91-20-3	217.9	120	19.2	2	5.9	2.13886e-06	0.604836	0.0221682	25.531	0.0027882	3.33667	0.280455	20.5431	1.46736	34.8618	0.41465	12.5808	0.00100122	1.65915	0.000215113	0.470761
Nicotine	nicotine	54-11-5	247	120	18.5	7.8	6.5	0.0177375	4.85154	0.0261184	22.4115	0.00265863	2.56784	0.387391	18.1072	1.114	28.1879	0.897378	14.6668	0.00198878	1.43329	0.000934684	0.53732
Nitric Acid	nitricacid	7697-37-2		25	13.5	18	18.6	nan	nan	1.03657	1.03657	nan	nan	nan	nan	nan	nan	nan	nan	nan	nan	nan	nan
Nitrobenzene	nitrobenzene	98-95-3	210.8	120	20	10.6	3.1	1.19871e-05	1.39227	0.00735116	13.761	0.000974078	2.06664	0.0485799	6.76124	0.73556	32.989	0.556565	15.8682	0.00119957	2.05322	0.000354507	0.694068
Nitroethane	nitroethane	79-24-3	114	113	16	15.5	4.5	4.16937e-05	2.24279	0.00234718	3.84235	0.000249881	0.966376	0.00628898	1.32078	0.0661624	17.1441	0.777427	20.0145	0.000936344	1.75891	0.000312483	0.646153
Nitroethylene	nitroethene	3638-64-0		25	16.3	16.6	5	5.5024e-05	5.5024e-05	0.00173322	0.00173322	0.000475512	0.000475512	0.0038905	0.0038905	0.087656	0.087656	0.546214	0.546214	0.00225401	0.00225401	0.000735161	0.000735161
Nitroglycerin (Glyceryl Trinitrate)	1,2,3-propanetrioltrinitrate	55-63-0	250	120	16.9	13	10.9	0.000539007	7.14534	0.0643835	19.2295	0.485912	9.89564	2.09566	18.5654	nan	nan	10.6648	28.2127	5.78079	nan	3.24392	12.8248
Nitromethane	nitromethane	75-52-5	101.1	100.1	15.8	18.8	6.1	2.62439e-05	0.524266	0.000141812	0.213135	3.43035e-06	0.0235704	5.96798e-05	0.0284018	0.000352712	0.247542	0.10353	4.65854	0.00012155	0.178407	3.84309e-05	0.0645099
Nitrosobenzene	nitrosobenzene	586-96-9		25	20	12.7	4	5.09804e-05	5.09804e-05	0.00722572	0.00722572	0.00301897	0.00301897	0.0431689	0.0431689	0.519852	0.519852	0.530478	0.530478	0.00101774	0.00101774	0.000325306	0.000325306
Nonane	n-nonane	111-84-2	150.8	120	15.7	0	0	5.0814e-08	0.0547639	0.0835524	38.7585	7.01195e-07	0.0162559	2.03595	38.4315	0.0517732	7.40092	0.0324897	2.79362	1.49983e-05	0.105266	1.8304e-06	0.0210515
Norephedrin	ephedrine	299-42-3	255	120	18	10.7	24.1	0.00285288	4.15332	0.0143384	15.3921	0.00100131	1.57247	0.144816	9.48097	0.375191	20.8105	0.602364	13.1917	0.00186549	1.46095	0.000804129	0.556654
o-Chlorofluorobenzene	o-chlorofluorobenzene	348-51-6	137.6	120	19.4	8.7	2	2.99627e-06	0.666894	0.0300299	30.3393	0.00349182	3.70201	0.505203	28.9317	2.2602	37.3	0.44195	13.6998	0.00269024	2.58318	0.000553147	0.728217
o-Chlorostyrene	o-chlorostyrene	2039-87-4	188.7	120	18.7	4.7	3.9	1.57441e-06	0.45322	0.0282125	27.6903	0.00152439	2.16436	0.436506	24.7685	1.52557	33.5106	0.359521	11.6065	0.00107246	1.51964	0.000213797	0.411354
o-Chlorotoluene	1-chloro-2-methylbenzene	95-49-8	159	120	19	4.9	2.3	1.44798e-06	0.462222	0.0385726	32.5245	0.00119795	2.11553	0.710273	31.408	1.92104	36.8315	0.432429	13.4852	0.000990835	1.61621	0.000194018	0.431689
o-Dichlorobenzene	1,2-dichlorobenzene	95-50-1	180	120	19.2	6.3	3.3	1.8172e-06	0.46149	0.0274076	27.3966	0.00133803	1.94032	0.449142	25.3616	1.50924	32.5996	0.389515	12.2035	0.00150938	1.6981	0.000298447	0.459598
o-Difluorobenzene	o-difluorobenzene	367-11-3	94	93	18	9	1	3.71435e-06	0.0552533	0.0267886	5.02641	0.00443976	1.02926	0.397137	10.2188	1.78287	23.0634	0.340758	5.58841	0.0027007	0.604508	0.000570344	0.15965
o-Methoxyphenol (Guaiacol)	2-methoxyphenol	90-05-1	205	120	18	7	12	0.00234316	4.07295	0.0105741	17.1062	0.00437425	3.35214	0.0828737	9.83736	0.37068	29.3238	0.40264	14.6663	2.91852	8.56647	1.43621	3.85317
Octadecane	octadecane	593-45-3	316.3	120	16.4	0	0	2.84743e-08	0.0299544	0.0449802	25.2285	1.87465e-07	0.00462869	0.936299	22.7771	0.0141926	2.01259	0.0156163	1.31792	5.89656e-06	0.041792	7.26035e-07	0.00841762
Octamethylcyclotetrasiloxane	octamethylcyclotetrasiloxane	556-67-2	175.8	120	12.8	1.3	1	1.14194e-06	0.13765	0.0326034	20.9895	1.14818e-05	0.0525472	0.66122	18.9055	0.159867	8.88334	0.110531	3.90301	9.25265e-05	0.203288	1.98524e-05	0.0526709
Octane	octane	111-65-9	125.6	120	15.5	0	0	5.84621e-08	0.0626709	0.0941334	41.587	9.68373e-07	0.0218199	2.37697	41.7418	0.0696245	9.9058	0.0384408	3.29377	1.87618e-05	0.130026	2.29471e-06	0.0260167
Octanoic Acid	caprylicacid	124-07-2	239	120	15.7	3.3	8.2	0.0160299	8.38272	0.0168365	16.0674	4.53907e-05	0.327645	0.167965	9.81139	0.0271054	6.44502	0.0924606	6.20509	8.37736	13.7506	5.51209	7.89526
Octyl Acetate	aceticacidoctylester	112-14-1	210	120	15.8	2.9	5.1	8.21571e-05	1.19036	0.0375162	26.2267	0.000180857	0.410202	0.697369	23.7099	0.761791	23.7396	0.620809	12.0129	0.000658093	0.830482	0.000242449	0.278118
Oleic Acid	cis-9-octadecenoicacid	112-80-1	360	120	16	2.8	6.2	0.00248134	1.99262	0.0197737	15.4739	2.34733e-05	0.115626	0.26869	11.2138	0.0278483	4.3979	0.0550605	3.41911	2.80764	4.55479	1.53044	2.03241
Oleyl Alcohol	oleyl-alcohol	143-28-2	334	120	16.5	2.6	8	9.25835e-05	0.687151	0.0256014	18.7876	4.00032e-06	0.0538929	0.393673	14.9132	0.0238559	4.27122	0.0440008	3.15932	0.00202782	0.628324	0.000744259	0.204583
OS-10 (Hexamethyldisiloxane)	hexamethyldisiloxane	107-46-0	99	98	12.6	2	0	2.39817e-06	0.0240854	0.0615401	9.83514	1.17357e-05	0.0146451	1.43901	18.5844	0.194662	6.2643	0.126023	2.62894	0.00010227	0.0652485	2.12153e-05	0.0156432
OS-20 (Octamethyltrisiloxane)	octamethyltrisiloxane	107-51-7	153	120	12.2	1.8	0	3.19155e-05	0.394687	0.0391028	24.3082	2.7084e-05	0.0951496	0.803348	22.2529	0.207452	11.0946	0.197633	5.55286	0.000170801	0.283506	5.31152e-05	0.0827279
OS-30 (Decamethyltetrasiloxane)	decamethyltetrasiloxane	141-62-8	194	120	11.7	2.4	0	8.96691e-06	0.217229	0.0320064	20.4663	1.42595e-05	0.0560765	0.634332	18.0448	0.132675	7.50011	0.123005	3.87825	9.77775e-05	0.185825	2.66071e-05	0.0515493
Oxalic Acid	oxalicacid	144-62-7		25	17	17	26	nan	nan	0.00188425	0.00188425	2.61071	2.61071	0.00564601	0.00564601	0.843549	0.843549	1.45238	1.45238	nan	nan	nan	nan
Oxalylchloride	oxalylchloride	79-37-8	63.5	62.5	16.1	3.8	7.5	4.71384e-06	0.00170993	0.0352702	0.743261	0.00152205	0.0498255	0.727514	4.34037	8.36985	20.1755	1.8606	6.79774	0.00873876	0.198717	0.00199725	0.0515633
Oxetane (Trimethylene Oxide)	oxetane	503-30-0	47.6	46.6	16.7	10	5.4	0.0747079	0.439799	0.0793778	0.475343	0.233688	1.2002	1.83011	4.84236	23.0441	32.6804	15.1975	21.6202	0.0502763	0.284127	0.0287003	0.15377
Ozone	o3	10028-15-6		25	19.8	4.2	0	nan	nan	nan	nan	nan	nan	nan	nan	nan	nan	nan	nan	nan	nan	nan	nan
p-Anisidine (Methoxy Aniline)	p-anisidine	104-94-9	243	120	19.9	6.5	11.3	0.000644296	4.12761	0.00222206	4.52526	0.00150766	2.42342	0.00615182	1.17545	0.0220736	5.84676	0.232896	9.6332	0.00231871	1.74638	0.000796247	0.641467
p-Bromobenzonitrile	4-bromobenzonitrile	623-00-7	236	120	20.4	9.3	5.8	9.96765e-06	0.59443	0.00145459	3.25406	0.00141443	2.08655	0.00382993	0.820359	0.0317336	7.23744	0.068614	4.27477	0.000158995	0.327596	4.76935e-05	0.107295
p-Bromonitrobenzene	4-bromonitrobenzene	586-78-7	256	120	20.9	9.9	5.9	3.92491e-06	0.478855	0.00302123	6.03703	0.000618169	1.03182	0.0142969	2.22896	0.253185	18.7423	0.161536	6.88208	0.000483235	0.692316	0.000133355	0.219199
p-Bromotoluene	1-bromo-4-methylbenzene	106-38-7	184.3	120	19.3	6.8	4.1	5.94985e-07	0.221728	0.0170549	20.5392	0.00179148	2.14436	0.216791	16.252	1.10599	28.5163	0.199678	7.7425	0.000341179	0.679297	6.49266e-05	0.175738
p-Chloro Acetophenone	1-(4-chlorophenyl)ethanone	99-91-2	232	120	19.6	7.6	4	0.000106092	1.97024	0.00983065	13.5874	0.00103865	1.70922	0.0815427	7.48716	0.45714	24.0921	0.507366	13.0966	0.00130329	1.47578	0.000453392	0.519968
p-Chloronitrobenzene	1-chloro-4-nitrobenzene	100-00-5	242	120	20.2	8.9	3.9	1.32035e-05	1.17326	0.00775124	12.5824	0.000923077	1.4835	0.0591418	6.65585	0.634583	26.9187	0.477578	13.2604	0.00254938	2.12679	0.000731209	0.712441
p-Chlorostyrene	p-chlorostyrene	1073-67-2	192	120	18.7	4.3	3.9	2.24607e-06	0.55655	0.0253736	26.4076	0.00222653	2.62362	0.36676	22.8205	1.50406	33.4112	0.412709	12.3836	0.00152647	1.822	0.000315086	0.507283
p-Chlorotoluene	1-chloro-4-methylbenzene	106-43-4	162.4	120	19.1	6.2	2.6	1.69262e-06	0.502512	0.0379722	32.265	0.00136124	2.23442	0.691724	31.023	1.90543	36.7441	0.45804	13.831	0.00117585	1.74692	0.000233178	0.471235
p-Dichlorobenzene	1,4-dichlorobenzene	106-46-7	174	120	19.7	5.6	2.7	3.13115e-06	0.589001	0.0261943	26.7228	0.00224364	2.36613	0.41651	24.3342	1.56082	32.6057	0.429163	12.7211	0.00312685	2.25939	0.000642174	0.633674
p-Diethyl Benzene	1,4-diethylbenzene	105-05-5	183.7	120	18	0	0.6	6.70196e-07	0.270586	0.0584261	34.6414	0.000202997	0.607275	1.29162	33.9454	0.93565	29.7393	0.260178	9.4557	0.00031806	0.740399	5.89454e-05	0.186956
p-Divinyl Benzene	p-divinylbenzene	105-06-6		25	18.6	1	7	2.17376e-06	2.17376e-06	0.0236929	0.0236929	0.00254626	0.00254626	0.30396	0.30396	1.33795	1.33795	0.410761	0.410761	0.00105505	0.00105505	0.000226491	0.000226491
p-Fluoroanisole	4-fluoroanisole	459-60-9	157	120	18.7	7.3	6.7	9.73785e-06	1.14413	0.015515	22.5193	0.0026584	3.46077	0.162225	16.4535	1.04777	33.9396	0.499082	14.2816	0.00173921	2.33382	0.000439263	0.724498
p-Nitro Toluene	1-methyl-4-nitro-benzene	99-99-0	238.3	120	19.5	11	3.6	1.1837e-05	1.19919	0.0111824	16.4472	0.00091662	1.7126	0.0983233	9.86371	0.954818	31.6725	0.640132	15.4282	0.00105038	1.70612	0.000317539	0.573256
Paracetamol	4-hydroxyacetanilide	103-90-2		25	17.8	10.5	13.9	0.00208063	0.00208063	0.000448007	0.000448007	9.31616e-06	9.31616e-06	0.000452316	0.000452316	0.000118391	0.000118391	0.0104145	0.0104145	0.101165	0.101165	0.0324434	0.0324434
Paraldehyde	paraldehyde	123-63-7	124.3	120	16	5	6	0.000281337	3.74701	0.0173251	19.3801	0.00103316	1.65788	0.193581	13.3009	0.963737	30.466	1.59363	20.5375	0.00156882	1.93136	0.000639767	0.739148
Pentachloro Ethane	pentachloroethane	76-01-7	159.8	120	18.2	3.2	2.4	3.30432e-05	0.582428	0.0187925	20.6129	0.00132679	0.557896	0.276983	17.7957	0.192668	15.1165	0.237744	8.14558	0.121663	2.57794	0.0312994	0.806694
Pentachlorophenol	pentachlorophenol	87-86-5	309.5	120	21.5	6.9	12.8	0.923634	3.47862	0.0135811	14.7352	0.332795	1.16507	0.178193	11.145	0.215313	13.3923	0.162326	6.22723	nan	10.4095	nan	6.81724
Pentanal (Valeraldehyde)	valeraldehyde	110-62-3	103	102	15.7	9.4	5.8	0.000587848	1.62315	0.0368136	10.8435	0.0043073	1.98512	0.559729	16.2035	3.5664	37.231	2.86025	22.5953	0.00398667	1.55166	0.00167761	0.608347
Pentane	pentane	109-66-0	36	35	14.5	0	0	9.75279e-08	7.26607e-07	0.159717	0.365164	3.73824e-06	1.45794e-05	4.71093	7.00907	0.258692	0.49693	0.0757053	0.138486	4.67076e-05	0.000160541	5.67167e-06	2.09648e-05
Pentanoic Acid	n-bucooh	109-52-4	186.1	120	15	4.1	10.3	0.0394997	15.3492	0.0108289	12.539	6.91713e-05	0.536538	0.0742531	5.73214	0.0223465	6.28848	0.131964	8.29148	12.6755	19.8448	8.90455	12.507
Perfluoro Ethylene (Tetrafluoro Ethylene	tetrafluoroethene	116-14-3	-75.9	-76.9	15.1	0	0	nan	1.94644e-23	nan	3.95505e-09	nan	1.79559e-17	nan	6.93328e-06	nan	3.6505e-09	nan	3.89284e-08	nan	3.38402e-16	nan	2.2893e-17
Perfluorobutane	decafluorobutane	355-25-9	-1.9	-2.9	10.6	0	0	nan	1.69454e-13	nan	4.66538e-05	nan	8.98184e-15	nan	0.000231356	nan	9.36039e-10	nan	8.28618e-07	nan	6.24487e-12	nan	4.2955e-13
Perfluoroheptane	perfluoroheptane	335-57-9	82.5	81.5	12	0	0	1.44622e-10	5.58036e-06	0.000714552	0.10351	1.5129e-12	1.88818e-08	0.00125954	0.0464872	2.1024e-08	1.24431e-05	8.8708e-06	0.000877299	5.99822e-10	1.83569e-06	5.36382e-11	2.50429e-07
Perfluorohexane (PFC 5060)	perfluoro-n-hexane	355-42-0	56.6	55.6	12.1	0	0	1.68229e-10	9.14812e-08	0.000813533	0.0148173	2.00533e-12	5.08505e-10	0.00148916	0.0122611	2.75904e-08	1.16124e-06	1.05419e-05	0.000156198	7.47989e-10	8.53329e-08	6.70878e-11	9.83923e-09
Perfluoromethylcyclohexane	perfluoromethylcyclohexane	355-02-2	76.3	75.3	12.4	0	0	1.68049e-10	2.52294e-06	0.000767849	0.0699126	1.94417e-12	1.02123e-08	0.0013824	0.0366899	2.54815e-08	8.45512e-06	1.01869e-05	0.00066075	7.21052e-10	1.06625e-06	6.4867e-11	1.41002e-07
Perfluoropentane (PFC 5050)	perfluoropentane	678-26-2	29.9	28.9	11.3	0	0	2.01554e-10	4.91935e-10	0.00095363	0.00142629	2.84789e-12	6.16098e-12	0.00183576	0.0024597	3.88791e-08	6.53995e-08	1.3028e-05	1.89682e-05	9.81261e-10	1.90787e-09	8.82672e-11	1.77718e-10
Phenetole (Ethyl Phenyl Ether)	ethoxybenzene	103-73-1	169.8	120	18.4	4.5	4	7.30251e-06	0.879727	0.0274761	28.1887	0.00170658	2.58914	0.39019	24.3075	1.65106	36.58	0.634318	15.5637	0.00111921	1.8116	0.000280073	0.544124
Phenol	phenol	108-95-2	181.8	120	18.5	5.9	14.9	2.16156	25.9819	0.00424348	8.07276	0.549334	13.2188	0.0164234	2.6101	0.0493519	14.4825	0.153158	10.7373	nan	nan	nan	nan
Phenyl Acetate	phenylacetate	122-79-2	196	120	19.8	5.2	6.4	5.25872e-05	1.96715	0.00659504	10.3203	0.000979347	1.73862	0.0397954	4.48236	0.340687	22.8708	0.598712	14.1171	0.000750485	1.28948	0.000260914	0.461146
Phenyl Acetonitrile	phenylacetonitrile	140-29-4	233.5	120	19.5	12.3	3.8	7.17049e-05	2.40975	0.00236144	4.6731	0.00265189	3.65968	0.00662067	1.20823	0.0449135	8.65627	0.26817	10.0193	0.000593588	0.967593	0.000199392	0.345988
Phenyl Acetylene	ethynylbenzene	536-74-3	143	120	18.8	2.8	4	1.99776e-05	1.55584	0.0159248	23.9704	0.0227041	8.21451	0.148908	16.0533	1.56645	40.1171	0.471295	15.1235	0.0209857	5.01715	0.00543638	1.64633
Phenylhydrazine	phenyl-hydrazine	100-63-0	243.5	120	20.4	6.5	14	0.0050599	7.63927	0.00208486	4.36861	0.00516851	5.27375	0.00519237	1.05202	0.0196887	5.9827	0.216456	10.2249	0.00560042	2.74905	0.0019228	1.03903
Phosgene	carbonicdichloride	75-44-5	8.2	7.2	16.4	5.3	5.3	nan	2.02475e-08	nan	0.012591	nan	2.3499e-05	nan	0.744343	nan	2.36016	nan	0.506455	nan	0.00011362	nan	1.96294e-05
Phosphoric Acid	phosphoricacid	7664-38-2		25	14.7	18.6	28.4	9.17873	9.17873	0.00044323	0.00044323	4.64897e-05	4.64897e-05	0.000482354	0.000482354	0.000163836	0.000163836	0.0134252	0.0134252	nan	nan	nan	nan
Phosphorous Oxychloride	pocl3	10025-87-3		25	18.1	9.3	0	2.99099e-06	2.99099e-06	0.0259742	0.0259742	0.000137323	0.000137323	0.45808	0.45808	1.35802	1.35802	1.4454	1.4454	0.000364446	0.000364446	0.000101322	0.000101322
Phosphorus Trichloride	pcl3	7719-12-2	76	75	18.4	3.6	0	1.4225e-07	0.000597663	0.0309947	1.58181	4.32582e-06	0.00154504	0.561615	5.93769	0.40224	5.68224	0.317974	2.83041	6.58051e-05	0.0112374	1.05604e-05	0.00229672
Phthalic Anhydride	phthalicanhydride	85-44-9	295	120	20	14.4	4.1	1.26495e-05	1.29221	0.00179812	3.92168	0.000202955	0.621763	0.00521682	1.05682	0.0870311	12.2893	0.268668	9.661	0.000408056	0.869503	0.000131638	0.308596
Picric Acid (2,4,6-Trinitrophenol)	2,4,6-trinitrophenol	88-89-1		25	19.2	7	6	0.000679984	0.000679984	0.00442082	0.00442082	0.00302515	0.00302515	0.0313754	0.0313754	5.15686	5.15686	2.33101	2.33101	2.20239	2.20239	1.14957	1.14957
Piperazine	piperazine	110-85-0	146	120	17.3	4.8	6	5.51076	32.1283	0.0165132	19.8239	0.0016136	6.29457	0.142397	11.5269	0.186061	30.3816	1.13758	26.826	0.00918698	4.83121	0.00505627	2.38871
Piperidine	piperidine	110-89-4	106.2	105.2	17.3	4.5	8.2	2.62178	13.1145	0.0658667	19.5149	0.00131848	1.83885	1.37361	30.4503	1.21568	36.1187	1.22817	19.1912	0.00933721	2.25319	0.0055479	1.01527
Propane	propane	74-98-6	-42.1	-43.1	13.1	0	0	nan	6.40942e-16	nan	0.000165294	nan	8.44761e-11	nan	0.270452	nan	0.00415749	nan	0.000672232	nan	1.10562e-09	nan	7.59943e-11
Propargylaldehyde	2-propynal	624-67-9		25	16.2	11.9	8.7	0.000528296	0.000528296	0.00124115	0.00124115	0.0014427	0.0014427	0.00184184	0.00184184	0.0168424	0.0168424	0.124143	0.124143	0.0281827	0.0281827	0.00922066	0.00922066
Propionaldehyde	propanal	123-38-6	48	47	15.3	11.1	6.9	0.00234545	0.0318326	0.0269661	0.183148	0.0306022	0.219541	0.306804	0.982522	7.49881	16.3351	7.28145	13.1454	0.0095224	0.072829	0.00440443	0.0328672
Propionaldehyde - 2,3-Epoxy	glycidylaldehyde	765-34-4	112.5	111.5	17.5	13.4	9.8	0.000106512	2.26503	0.00103614	1.52142	0.000134098	0.408154	0.00155834	0.333337	0.0164847	3.84979	0.485346	13.0834	0.000221701	0.50613	8.4111e-05	0.198867
Propionamide	propanamide	79-05-0	213	120	16.7	14.6	11.5	0.0056726	12.1654	0.00094523	1.50067	7.97398e-06	0.101097	0.00112781	0.179386	0.000115535	0.121578	0.0255204	2.84889	0.000403039	0.409012	0.000164562	0.175251
Propionic Acid	propionicacid	79-09-4	141.1	120	14.7	5.3	12.4	0.0648954	22.0644	0.00453881	6.6017	4.57664e-05	0.458818	0.0164634	1.86313	0.00868751	3.2778	0.13543	8.5683	15.3568	23.0372	10.7441	14.6715
Propionic Anhydride	propanoicacid,anhydride	123-62-6	170	120	15.8	9	7.7	8.84046e-05	2.9534	0.0131176	15.5801	0.00110386	1.78301	0.122954	9.23037	1.1228	31.3496	1.60502	21.1425	0.00136976	1.87992	0.00053768	0.722289
Propionitrile	propionitrile	107-12-0	97.1	96.1	15.3	14.3	5.5	0.000956996	2.04128	0.00738677	2.14739	0.0521885	9.05754	0.0335666	1.38523	0.787071	22.1401	3.10101	23.6462	0.00209753	0.817393	0.000911399	0.34483
Propionylchloride	propionylchloride	79-03-8	80	79	16.1	10.3	5.3	1.16371e-05	0.0306214	0.0204156	1.71364	0.00308306	0.378865	0.24179	4.2881	2.56518	21.9737	1.56498	10.7301	0.00462163	0.460318	0.00118877	0.135993
Propyl Amine	n-propylamine	107-10-8	47.2	46.2	16	4.9	8.6	15.5387	17.8526	0.0531178	0.323414	0.0185572	0.170991	0.824648	2.38318	1.94478	7.12094	3.9611	8.88923	0.0651102	0.295317	0.0395179	0.177387
Propyl Chloride	1-chloropropane	540-54-5	46.5	45.5	16	7.8	2	4.42337e-06	0.000152431	0.0684948	0.389039	0.00239945	0.0193708	1.56211	4.22207	4.58395	10.9228	1.58904	3.68874	0.0021642	0.0173576	0.00048309	0.00414602
Propyl Formate	n-propylformate	110-74-7	80.9	79.9	15.5	7.1	8.6	0.000390829	0.213426	0.0242274	1.88619	0.00294702	0.371357	0.290553	4.23228	2.36878	21.2198	2.28032	13.1603	0.00502938	0.446588	0.00206359	0.177051
Propyl Methacrylate	propylmethacrylate	2210-28-8	141	120	15.5	6.6	7	0.000128108	1.99572	0.0415795	31.0904	0.00102387	1.59299	0.773698	29.2267	2.39204	37.2646	1.14862	18.3126	0.0015016	1.73177	0.000571049	0.604837
Propylene	propene	115-07-1	-47.6	-48.6	13.3	1.6	1.5	nan	1.23683e-14	nan	4.5316e-05	nan	2.29272e-07	nan	0.0884208	nan	0.219769	nan	0.0203703	nan	4.72189e-08	nan	7.5903e-09
Propylene Carbonate	propylenecarbonate	108-32-7	242	120	20	18	4.1	0.00014897	3.76636	0.000965306	1.9313	6.62399e-05	0.276578	0.00157719	0.327231	0.00939175	2.11062	0.439123	11.4131	0.000149884	0.431387	6.00227e-05	0.17432
Propylene Chlorohydrin	1-chloro-2-propanol	127-00-4	127	120	16.8	9.8	15.3	0.00230393	8.95839	0.00929268	16.3553	0.000220673	1.70816	0.0603474	8.18711	0.0638728	20.4353	0.426576	18.8268	0.0256938	5.78206	0.0100864	2.43464
Propylene Glycol	propyleneglycol	57-55-6	187.6	120	16.8	10.4	21.3	0.00461072	12.4401	0.00208871	3.23292	5.89451e-07	0.032312	0.00424179	0.600192	0.000230726	0.264656	0.036497	3.81505	0.0046867	1.66829	0.00184042	0.708076
Propylene Glycol Mono-t-Butyl Ether	1-(1,1-dimethylethoxy)-2-propanol	57018-52-7		25	15.3	6.1	10.8	0.00435015	0.00435015	0.0388908	0.0388908	0.000397667	0.000397667	0.675542	0.675542	0.823689	0.823689	1.14442	1.14442	0.0023658	0.0023658	0.00116727	0.00116727
Propylene Glycol Monobutyl Ether	1-butoxy-2-propanol	5131-66-8	171.5	120	15.3	4.5	9.2	0.0021046	4.19745	0.0388122	29.8766	0.000177543	0.705725	0.665094	27.3201	0.508031	28.3077	0.71314	16.2216	0.00210495	1.69713	0.000992885	0.644181
Propylene Glycol Monoethyl Ether	1-ethoxy-2-propanol	1569-02-4	131	120	15.7	6.5	10.5	0.0054686	8.59485	0.0371308	32.089	0.000646648	2.05146	0.585583	29.1084	1.02206	38.5279	1.4693	24.224	0.00486874	3.39781	0.00243449	1.4154
Propylene Glycol Monoethyl Ether Acetate	1-ethoxy-2-propanol-acetate	54839-24-6		25	15.6	6.3	7.7	0.000435449	0.000435449	0.0213998	0.0213998	0.00118086	0.00118086	0.276544	0.276544	1.34377	1.34377	1.68243	1.68243	0.00163639	0.00163639	0.00071034	0.00071034
Propylene Glycol Monoisopropyl Ether	1-isopropoxy-2-propanol	3944-36-3	137.5	120	15.5	6.1	11	0.00492619	6.88222	0.0382611	30.9058	0.000617455	1.523	0.638486	28.2228	1.04887	35.4056	1.42801	21.7537	0.00335538	2.48819	0.00166608	1.00558
Propylene Glycol Monomethyl Ether	1-methoxy2-propanol	107-98-2	119	118	15.6	6.3	11.6	0.00786468	10.9049	0.0293851	26.2081	0.000724326	2.53139	0.381914	23.1031	0.821428	38.6824	1.58483	26.315	0.00778856	4.47049	0.00389774	1.96789
Propylene Glycol Monomethyl Ether Acetate	1-methoxy-2-acetoxypropane	108-65-6	145	120	15.6	5.6	9.8	0.000588058	4.86371	0.0168831	17.5807	0.00178597	2.10429	0.182769	11.3788	1.33632	31.5512	2.13284	22.2457	0.0018787	1.97684	0.000839708	0.79668
Propylene Glycol Monophenyl Ether	1-phenoxy-2-propanol	770-35-4	242.7	120	17.4	5.3	11.5	0.000607571	3.12595	0.0114589	14.5148	0.000441619	1.28843	0.0973938	8.26979	0.201067	19.3477	0.350701	11.8798	0.00486671	2.15408	0.00189293	0.799247
Propylene Glycol Monopropyl Ether	1-propoxy-2-propanol	1569-01-3	150	120	15.8	7	9.2	0.00321912	5.86035	0.0389389	31.2551	0.000314737	1.15369	0.651052	28.6866	0.706907	33.319	0.988113	19.7439	0.0031401	2.35849	0.00152615	0.932667
Propylene Imine (2-Methyl Aziridine)	2-methylaziridine	75-55-8	67	66	17.8	8.4	6.5	4.43239	11.5174	0.0340589	0.965338	0.0279557	1.31229	0.405327	3.07821	1.90741	16.1198	3.55054	14.6572	0.0344776	0.714503	0.0192774	0.380952
Propylene Oxide	1,2-epoxypropane	75-56-9	35	34	15.2	8.6	6.7	0.00412917	0.0116092	0.0512736	0.113606	0.0704177	0.156969	0.884753	1.40253	15.2264	19.3392	9.60556	12.0137	0.0170873	0.0396543	0.00823476	0.0187782
Propynonitrile	propiolonitrile	1070-71-9		25	15.5	17	6.3	0.00093861	0.00093861	0.00229783	0.00229783	0.0663418	0.0663418	0.00472411	0.00472411	0.036541	0.036541	0.0790834	0.0790834	0.395109	0.395109	0.126661	0.126661
Pulegone	pulegone	89-82-7	224	120	17.5	8.9	5.5	0.000993338	3.25925	0.0385746	27.4548	0.00115335	1.38607	0.724766	25.0974	1.8542	31.6816	1.39432	17.2658	0.00159021	1.43318	0.000731818	0.541178
Pyrazole	pyrazole	288-13-1	187	120	20.2	10.4	12.4	0.00250351	9.98479	0.000368243	0.982702	0.000322821	1.10426	0.000251361	0.0915547	0.000229022	0.222374	0.0231166	2.65003	0.00391594	1.3802	0.00128643	0.527155
Pyridazine	pyridazine	289-80-5	208	120	20.2	17.4	11.7	0.0211887	13.6143	0.00110995	1.98977	0.0010974	2.51781	0.00166538	0.303057	0.00858441	2.26307	0.258214	9.95669	0.000267534	0.433404	0.000122389	0.190301
Pyridine	pyridine	110-86-1	115.2	114.2	19	8.8	5.9	0.0572707	10.342	0.0115947	11.9528	0.0212929	10.6208	0.0820255	7.39699	1.25564	40.4097	1.41719	23.1058	0.00430014	2.78064	0.00197808	1.13879
Pyrimidine	pyrimidine	289-95-2	123.8	120	20.5	9.4	11.3	0.0109835	11.7385	0.00283646	5.72036	0.00552123	8.1623	0.00797804	1.46359	0.0756287	17.9685	0.484107	16.9716	0.000855486	1.43269	0.000374978	0.585228
Pyrogallol (1,2,3-Trihydroxybenzene)	1,2,3-trihydroxybenzene	87-66-1	309	120	20.7	10.7	21.1	nan	nan	nan	nan	nan	nan	nan	nan	nan	nan	nan	nan	nan	nan	nan	nan
Pyrrole	pyrrole	109-97-7	129.7	120	19.2	11	10	0.000871363	11.7558	0.00214423	5.46915	0.0594103	15.7692	0.00480126	1.27586	0.0435843	16.1301	0.303291	15.9422	0.380717	14.7504	0.124537	6.84967
Pyrrolidine	pyrrolidine	123-75-1	86.5	85.5	17.9	6.5	7.4	10.502	19.1762	0.0595961	5.66598	0.01547	2.7564	1.11043	14.9699	3.03571	32.1861	4.53178	22.4268	0.0417684	2.07535	0.0266932	1.16214
Pyruvonitrile	2-oxo-propanenitrile	631-57-2		25	15.9	18.9	8	1.97008e-05	1.97008e-05	0.000716757	0.000716757	0.000534461	0.000534461	0.000817582	0.000817582	0.00929526	0.00929526	0.205716	0.205716	0.000153415	0.000153415	4.91824e-05	4.91824e-05
Quinine	quinine	130-95-0		25	19	6.6	11	0.00171137	0.00171137	0.00759784	0.00759784	0.000418311	0.000418311	0.0656722	0.0656722	0.166928	0.166928	0.325051	0.325051	0.00060506	0.00060506	0.000249397	0.000249397
Quinoline	chinoline	91-22-5	237.1	120	20.5	5.6	5.7	0.00451471	3.79547	0.0102763	14.7232	0.00456679	4.44108	0.0792789	7.61065	0.594049	28.3416	0.498641	13.2055	0.0015442	1.59161	0.000591133	0.563901
Saccharin	saccharin	81-07-2		25	21.1	12.5	9.8	0.000103906	0.000103906	0.000188217	0.000188217	8.82689e-06	8.82689e-06	0.000130822	0.000130822	0.000225342	0.000225342	0.019091	0.019091	0.00483218	0.00483218	0.00154934	0.00154934
Salicylaldehyde	salicylicaldehyde	90-02-8	197	120	19	10.5	12	5.17386e-05	2.0297	0.00949676	16.2169	0.00121693	2.29844	0.0717873	8.9021	0.822259	33.8267	0.610613	16.4195	0.00203676	2.45635	0.000652934	0.855661
Salicylic Acid	salicylicacid	69-72-7		25	19	9	13.7	2.08359	2.08359	0.00655319	0.00655319	0.0344288	0.0344288	0.0396985	0.0396985	0.0967214	0.0967214	0.127302	0.127302	nan	nan	nan	nan
Sebacic Acid	decanedioicacid	111-20-6		25	17.1	7.1	11.7	0.0185831	0.0185831	0.00333377	0.00333377	5.44547e-06	5.44547e-06	0.0132686	0.0132686	0.00164603	0.00164603	0.0404098	0.0404098	7.82859	7.82859	4.60151	4.60151
sec-Butyl Acetate	sec-butylacetate	105-46-4	112	111	15	3.7	7.6	0.000383973	1.86964	0.0400404	18.0782	0.00174431	1.39105	0.70976	22.0887	2.9933	35.3373	1.96518	19.6419	0.00240074	1.48048	0.00102336	0.56195
Skatole	methylindole	83-34-1	266	120	20	7.1	6.2	0.00023579	3.93225	0.00831176	12.3553	0.0939126	9.68797	0.0566325	5.79007	0.472297	25.5779	0.445548	12.8984	0.452814	9.38403	0.146497	4.05775
Stearic Acid	octadecanoicacid	57-11-4	383	120	16.3	3.3	5.5	0.00195521	1.71294	0.0214414	16.375	9.41715e-06	0.0687543	0.303727	12.2356	0.0174032	3.38894	0.0379713	2.806	2.29092	4.02452	1.1756	1.74555
Styrene	styrene	100-42-5	145	120	18.6	1	4.1	2.70638e-06	0.76236	0.0298334	31.9227	0.00413333	4.77579	0.417147	28.2158	2.28929	41.8685	0.580714	16.3305	0.00140183	2.29878	0.000303671	0.657842
Styrene Oxide (Phenyl Oxirane)	styreneoxide	96-09-3	194.1	120	19.4	5.8	6.6	3.45827e-05	1.72935	0.0115377	17.3518	0.00227956	3.20971	0.0949528	9.88577	0.798367	32.3707	0.692212	16.221	0.00108685	1.81539	0.000340142	0.613499
Succinic Anhydride	dihydro-2,5-furandione	108-30-5	261	120	18.6	17.5	16	5.5469e-06	0.713559	1.70086e-05	0.133223	2.38555e-08	0.00163398	2.00619e-06	0.00455202	1.46035e-06	0.00686826	0.00829171	0.950473	1.01022e-06	0.0174522	3.31287e-07	0.00656157
Succinonitrile	butanedinitrile	110-61-2	266	120	18.2	17	7.9	4.42111e-06	0.380807	1.16873e-06	0.0206715	1.09094e-08	0.00090875	1.83359e-08	0.000171597	9.84679e-10	4.8155e-05	0.000241176	0.0927513	4.14067e-08	0.0010446	1.30051e-08	0.00038769
Sulfanilamide	sulfanilamide	63-74-1		25	20	19.5	10.7	5.06324e-05	5.06324e-05	1.34363e-05	1.34363e-05	1.90908e-07	1.90908e-07	1.45593e-06	1.45593e-06	9.83077e-08	9.83077e-08	0.00087446	0.00087446	3.32974e-05	3.32974e-05	1.04028e-05	1.04028e-05
Sulfolane (Tetramethylene Sulfone)	tetrahydrothiophene-1,1-dioxide	126-33-0	287.3	120	17.8	17.4	8.7	0.000907763	5.93824	0.00190962	1.70427	0.000348087	0.283477	0.0050342	0.297414	0.0343138	1.47672	1.30181	12.0833	0.000322383	0.300424	0.000154334	0.134991
Sulfur Dicyanide	sulfurcyanide	627-52-1		25	18.1	13.5	0	3.64307e-06	3.64307e-06	0.000497477	0.000497477	0.00530595	0.00530595	0.000521281	0.000521281	0.066764	0.066764	0.382923	0.382923	2.71552e-05	2.71552e-05	7.91976e-06	7.91976e-06
Sulfur Dioxide	so2	7446-09-5	-10	-11	15.8	8.4	10	nan	8.04878e-08	nan	0.000145683	nan	0.00214755	nan	0.0050091	nan	19.5845	nan	13.0013	nan	0.00388467	nan	0.000999002
Sulfuryl Chloride	sulfurylchloride	7791-25-5	69.3	68.3	17.6	7.2	0	8.44366e-07	0.000960553	0.0698195	1.89749	0.000159293	0.0133239	2.20496	11.2925	8.62306	21.7818	2.00424	8.08929	0.00153177	0.080262	0.000295413	0.018326
t-Butyl Acetate	tert-butylacetate	540-88-5	97	96	15	3.7	6	0.000337792	0.488311	0.0420011	7.53734	0.00133296	0.460295	0.769773	14.4348	2.70871	26.6161	1.70452	13.6374	0.00225326	0.590765	0.000925196	0.219443
t-Butyl Alcohol	tert-butanol	75-65-0	82.4	81.4	15.2	5.1	14.7	0.00450682	0.870071	0.0252902	2.10588	2.8396e-05	0.0225963	0.255398	3.79977	0.0405752	1.99315	0.186312	3.28119	0.0116214	0.708127	0.00517811	0.302586
Terephthalic Acid	1,4-benzenedicarboxylicacid	100-21-0		25	20	7.4	12.8	0.455615	0.455615	0.00118252	0.00118252	9.89988e-05	9.89988e-05	0.00240894	0.00240894	0.000853147	0.000853147	0.0143516	0.0143516	nan	nan	nan	nan
Tetrachloroethylene	tetrachloroethene	127-18-4	121.3	120	18.3	5.7	0	5.61796e-08	0.0563496	0.0312452	27.7802	2.96811e-06	0.0506908	0.577844	26.9348	0.0962067	14.2079	0.0877917	5.50829	2.13465e-05	0.143338	2.93011e-06	0.0306861
Tetraethylorthosilicate	ethylsilicate	78-10-4	168.8	120	13.9	4.3	0.6	0.00119934	3.80106	0.0214257	17.2771	0.00119543	1.12408	0.314909	13.1305	1.22776	23.8518	1.61399	15.9263	0.00138549	1.11996	0.000681127	0.453548
Tetrahydrofuran (THF)	thf	109-99-9	65	64	16.8	5.7	8	0.0524046	0.916639	0.081061	1.70413	0.0379389	0.810312	1.98756	10.0874	13.9636	31.2636	8.89913	19.112	0.0214748	0.428894	0.0121449	0.214658
Tetrahydrofurfuryl Alcohol	tetrahydrofurfurylalcohol	97-99-4	178	120	17.8	8.2	12.9	0.00827144	12.2455	0.0178933	20.2671	0.000367969	1.69902	0.178747	13.0301	0.307582	28.1061	1.20629	22.8223	0.00582243	3.69876	0.00294406	1.65154
Tetrahydronaphthalene	tetralin	119-64-2	207.6	120	19.6	2	2.9	9.6465e-07	0.353754	0.0531186	34.1463	0.000399385	1.01073	1.1472	33.5721	1.29989	32.9709	0.34707	11.3409	0.000452389	0.985143	8.89947e-05	0.258359
Tetrahydropyran	thp	142-68-7	88	87	16.4	6.3	6	0.00779213	1.10972	0.0804967	7.33539	0.00516292	0.762566	2.03579	20.9306	7.1863	33.677	3.87663	17.851	0.0064247	0.723214	0.00323971	0.302043
Tetrahydrothiapyran	tetrahydro-2h-thiopyran	1613-51-0	141.8	120	18.5	6.3	8.9	1.51344e-05	1.25588	0.0614613	39.8193	0.00499478	5.35001	1.38157	40.3207	5.25734	46.6893	1.96852	26.0251	0.00154004	2.46191	0.000421126	0.757695
Tetramethylene Sulfide	tetrahydrothiophene	110-01-0	121	120	18.6	6.7	6	3.57794e-05	2.27464	0.0572517	41.7812	0.0198364	11.2248	1.19529	42.2896	8.61795	52.4071	3.67766	32.9585	0.00285718	4.05019	0.000866381	1.36035
Tetramethylene Sulfoxide	tetramethylenesulfoxide	1600-44-8		25	18.2	11	9.1	1.40785	1.40785	0.0138247	0.0138247	0.0753013	0.0753013	0.126098	0.126098	4.27236	4.27236	11.766	11.766	0.0230893	0.0230893	0.0133257	0.0133257
Tetramethylurea	tetramethylurea	632-22-4	176.5	120	16.7	8.2	11	0.287848	22.4078	0.0318899	24.6091	0.044514	9.88932	0.500525	20.0037	6.69631	43.6748	8.00967	32.5053	0.018113	5.01793	0.0113275	2.62296
Tetranitromethane	tetranitro-methane	509-14-8		25	15.5	8.5	7	0.0001064	0.0001064	5.80188	5.80188	5.16957	5.16957	nan	nan	nan	nan	nan	nan	nan	nan	8.93093	8.93093
Thiazole	thiazole	288-47-1	118	117	20.5	18.8	10.8	0.00153541	4.57582	0.00346045	6.60773	0.0051823	7.38163	0.0118258	2.2491	0.201134	31.4369	0.541002	19.3554	0.00154662	1.74171	0.000557669	0.637252
Thioacetamide	ethanethioamide	62-55-5		25	17.5	20.6	20.2	0.000215961	0.000215961	3.08494e-05	3.08494e-05	3.04642e-05	3.04642e-05	4.25239e-06	4.25239e-06	1.84517e-06	1.84517e-06	0.00932206	0.00932206	0.000393436	0.000393436	0.000123662	0.000123662
Thioacetic Acid	thioaceticacid	507-09-5	88	87	17	6.7	8.9	0.000215472	0.326681	0.00626563	1.21178	0.0114907	1.86752	0.0312117	1.20954	1.2236	23.7872	2.31181	17.9572	0.0141366	1.13275	0.00497988	0.421827
Thiocyanic Acid	thiocyanicacid	463-56-9		25	16.8	8.9	10.9	0.0039277	0.0039277	0.000312867	0.000312867	0.0144645	0.0144645	0.000204586	0.000204586	0.00449326	0.00449326	0.145929	0.145929	1.79652	1.79652	0.565078	0.565078
Thiodiethylenglycol	2,2'-thiobisethanol	111-48-8	282	120	17.3	8.8	19.8	0.00231503	7.27704	0.00305958	4.43068	7.90263e-05	0.465714	0.0102935	1.1751	0.0176472	3.71532	0.342074	11.0183	0.00246241	1.48614	0.00104852	0.619579
Thioglycolic Acid (Mercapto Acetic Acid)	mercaptoaceticacid	68-11-1		25	16	13.5	20	0.000203125	0.000203125	7.06666e-05	7.06666e-05	1.77421e-06	1.77421e-06	1.96639e-05	1.96639e-05	3.41763e-05	3.41763e-05	0.0352855	0.0352855	0.000429047	0.000429047	0.000140398	0.000140398
Thionyl Chloride	thionylchloride	7719-09-7	76	75	16.9	6.4	6.1	2.65923e-06	0.00551304	0.0239297	1.30932	0.000702051	0.0776513	0.384815	4.49198	6.38489	22.6577	2.00198	9.88386	0.00293153	0.20288	0.000608025	0.0508119
Thiophene	thiophene	110-02-1	84	83	18.9	2.4	7.8	4.55026e-06	0.0230644	0.0193118	2.17678	0.0186823	1.75018	0.203093	4.50814	4.42828	29.6321	1.22409	10.5348	0.00304966	0.397784	0.000684002	0.10673
Thiophenol	thiophenol	108-98-5	169.1	120	20	4.5	10.3	2.26982e-05	1.51897	0.00976879	17.5957	0.0282709	8.46275	0.0706437	9.24347	1.29077	38.0059	0.822771	18.9443	0.0165385	4.03027	0.00443002	1.31811
Thiourea	thiourea	62-56-6		25	20	19.4	14.8	2.52213e-05	2.52213e-05	8.75184e-08	8.75184e-08	3.23187e-09	3.23187e-09	2.55427e-10	2.55427e-10	1.08392e-12	1.08392e-12	9.45486e-06	9.45486e-06	1.32739e-06	1.32739e-06	3.63606e-07	3.63606e-07
Thiourea From Urea Min Sphere	thiourea	62-56-6		25	18	15	12	2.52213e-05	2.52213e-05	8.75184e-08	8.75184e-08	3.23187e-09	3.23187e-09	2.55427e-10	2.55427e-10	1.08392e-12	1.08392e-12	9.45486e-06	9.45486e-06	1.32739e-06	1.32739e-06	3.63606e-07	3.63606e-07
Thymine	thymine	65-71-4		25	19	20.5	13	0.000236484	0.000236484	6.47887e-05	6.47887e-05	3.88421e-08	3.88421e-08	1.68532e-05	1.68532e-05	5.93701e-07	5.93701e-07	0.00157787	0.00157787	2.14957e-05	2.14957e-05	7.59632e-06	7.59632e-06
Thymol	thymol	89-83-8	232.5	120	19	4.5	10.8	1.44596	13.8347	0.0195774	20.4444	0.831838	7.57932	0.2294	14.8519	0.29739	23.3147	0.222067	10.2137	nan	nan	nan	19.1245
Tigaldehyde	trans-2-methyl-2-butenal	497-03-0	115	114	16.2	12.9	6.8	0.00219503	7.03408	0.0273564	18.7432	0.015821	7.57583	0.346027	17.6169	5.3136	46.4997	4.16228	30.6633	0.00548223	3.52141	0.00263342	1.52388
Toluene	toluene	108-88-3	110.6	109.6	18	1.4	2	2.24935e-06	0.263178	0.0540295	22.5646	0.00299708	2.53994	1.05658	30.853	3.64244	40.9649	0.709343	14.806	0.001341	1.34438	0.000281031	0.364255
Trans-Crotononitrile	(e)-2-butenenitrile	627-26-9	120	119	16.4	18.8	5.5	0.000407016	6.99914	0.00765197	11.7037	0.0283027	15.9687	0.0376765	4.61745	0.635078	39.9122	1.55917	28.1016	0.00175986	2.75656	0.000713205	1.0935
Trans-Decahydronaphthalene	trans-decalin	493-02-7	187.3	120	18	0	0	5.30516e-08	0.0573449	0.0761557	36.8592	6.14122e-07	0.0160602	1.89308	36.8601	0.0461569	7.52404	0.0318706	2.83475	1.4997e-05	0.10987	1.85593e-06	0.0222408
Tri-n-Butyl Borate	tributoxyborane	688-74-4	234	120	16.7	1.8	4.6	2.40965e-05	0.123812	0.0463886	26.2494	2.74048e-06	0.0246597	1.02035	24.587	0.0868372	6.85754	0.0644235	3.12247	4.3373e-05	0.134604	8.48777e-06	0.0320017
Tri-n-Butyl Phosphate	tri-n-butylphosphate	126-73-8		25	16.3	6.3	4.3	0.000556923	0.000556923	0.0241121	0.0241121	0.000195784	0.000195784	0.402578	0.402578	0.52886	0.52886	0.702529	0.702529	0.000663591	0.000663591	0.000306291	0.000306291
Trichloroacetic Acid	trichloroaceticacid	76-03-9	196.5	120	18.3	7	13	nan	nan	0.00721954	10.0279	nan	19.292	0.0540389	4.95576	0.10407	17.0056	0.248126	11.8081	nan	nan	nan	nan
Trichloroacetonitrile	trichloroacetonitrile	545-06-2	85.7	84.7	16.4	7.4	6.1	4.68128e-07	0.00451135	0.0201706	2.15624	0.000205361	0.0697699	0.270657	4.94364	0.323983	7.55623	0.293182	3.66317	8.1072e-05	0.0302017	1.61362e-05	0.00728705
Trichloroethylene	trichloroethene	79-01-6	87.2	86.2	18	3.1	5.3	5.10391e-06	0.0172135	0.038651	3.94249	0.000925008	0.126337	0.779733	11.3972	0.878392	13.5562	0.34992	4.51808	0.0114672	0.443728	0.00240511	0.110075
Trichlorofluoromethane (Freon 11)	cfcl3	75-69-4	23.7	22.7	15.3	2	0	nan	3.92441e-08	nan	0.0365501	nan	2.81376e-06	nan	0.886401	nan	0.0903337	nan	0.0798241	nan	2.17913e-05	nan	2.82803e-06
Trichloromethylsilane	trichloromethylsilane	75-79-6	65.6	64.6	16.5	6.6	3.5	1.45967e-06	0.000758754	0.0314959	0.753384	0.000297776	0.0126689	0.575651	3.67566	0.616343	4.3597	0.400244	2.14596	0.00115373	0.0352386	0.000218428	0.00782199
Trichlorosilane	trichlorosilane	10025-78-2	31.8	30.8	14.2	3.6	3.8	5.12521e-07	1.53692e-06	0.0333768	0.056004	6.22471e-05	0.00012324	0.624382	0.845184	0.445344	0.628271	0.368283	0.489054	0.000320013	0.00060152	5.41687e-05	0.000105014
Tricyclene	tricyclene	508-32-7	152.5	120	16.9	0	0	9.36546e-08	0.0794716	0.0789043	37.3748	4.26312e-06	0.0531034	2.02197	37.606	0.152755	15.4829	0.0566953	4.01121	4.05563e-05	0.200014	5.48217e-06	0.0423104
Tridecyl Alcohol	1-tridecanol	112-70-9	274	120	16.2	3.1	9	0.000199964	1.21435	0.0274309	20.9724	2.28785e-06	0.0544759	0.39537	16.5405	0.0159382	4.27754	0.0409958	3.61212	0.00212681	0.891608	0.000827801	0.305694
Triethanolamine	triethanolamine	102-71-6	335.4	120	17.3	7.6	21	0.00601662	7.96463	0.00311512	2.95224	7.72833e-06	0.043754	0.0111001	0.679767	0.00520246	0.571766	0.23164	5.05214	0.000743551	0.522204	0.00037133	0.23603
Triethyl Citrate	triethylcitrate	77-93-0		25	16.5	4.9	12	0.000175639	0.000175639	0.00488564	0.00488564	0.000137414	0.000137414	0.030869	0.030869	0.109302	0.109302	0.55593	0.55593	0.000482526	0.000482526	0.000203775	0.000203775
Triethylamine	triethylamine	121-44-8	89	88	15.5	0.4	1	nan	7.66601	0.102196	8.73731	0.000110268	0.0353267	2.76087	23.1542	0.783691	12.943	0.537246	4.69569	0.00357651	0.172334	0.00256376	0.073362
Triethylene Glycol	triethyleneglycol	112-27-6	285	120	16	12.5	18.6	0.0120661	9.81674	0.00768522	8.31605	0.000893427	1.08899	0.0530029	3.55819	0.330159	15.8388	2.09321	19.4089	0.00166283	1.33413	0.000845902	0.58989
Triethylene Glycol Monomethyl Ether	2-2-(2-methoxyethoxy)ethoxyethanol	112-35-6	249	120	16.2	7.6	12.5	0.00833014	9.49293	0.00859416	8.19144	0.000410955	0.76865	0.0624885	3.6267	0.175077	10.9244	1.30435	16.2299	0.00195702	1.26018	0.00103279	0.569916
Triethylphosphate	triethylphosphate	78-40-0	215.5	120	16.7	11.4	9.2	0.00313475	6.09561	0.0146236	13.6696	0.00154183	1.49259	0.165054	8.6616	1.10645	24.8088	2.03546	18.6915	0.00202948	1.48632	0.00103675	0.639217
Trifluoroacetic Acid	trifluoroaceticacid	76-05-1	73	72	15.6	9.7	11.4	nan	nan	0.00186989	0.124898	nan	nan	0.0050412	0.0986832	0.0022147	0.10944	0.022324	0.405037	nan	nan	nan	nan
Trifluoromethane (Freon 23)	chf3	75-46-7	-82.1	-83.1	14.4	8.7	6.3	nan	8.71279e-13	nan	2.12216e-10	nan	0.00415076	nan	2.73695e-07	nan	1.09061e-05	nan	4.21081e-05	nan	8.78419	nan	4.81651
Trimethyl Amine	trimethylamine	75-50-3	2.8	1.8	14.6	3.4	1.8	nan	1.96768	nan	0.0174715	nan	0.00364612	nan	1.55026	nan	6.12486	nan	3.43297	nan	0.00406591	nan	0.00289957
Trimethylbenzene	1,2,4-trimethylbenzene	95-63-6	169.3	120	18	1	1	1.02458e-06	0.374525	0.0569412	36.0957	0.000551846	1.26632	1.217	35.5023	1.58516	35.8884	0.385416	12.2983	0.000509131	1.09008	0.00010011	0.285511
Trimethylene Sulfide	thiacyclobutane	287-27-4	95	94	18.8	7.8	9.4	2.78105e-05	0.211957	0.0584444	9.98082	0.0465619	6.47802	1.18298	22.9659	12.98	45.7814	4.89225	26.4171	0.00378902	1.23627	0.0010961	0.389248
Trimethylphosphate	trimethylphosphate	512-56-1	197.2	120	15.7	10.5	10.2	0.00222849	7.35989	0.0054114	6.73323	0.000926558	1.27036	0.0302173	2.54331	0.376837	18.1334	1.75012	19.4002	0.00127259	1.33472	0.000607967	0.579674
Trinitromethane	trinitromethane	517-25-9		25	15.5	10.3	7.3	6.39874	6.39874	1.95621	1.95621	nan	nan	nan	nan	nan	nan	nan	nan	nan	nan	nan	nan
Trinitrotoluene (TNT) (DM)	2-methyl-1,3,5-trinitrobenzene	118-96-7		25	19.5	3.5	4.4	1.84228e-05	1.84228e-05	0.00359057	0.00359057	0.000428668	0.000428668	0.0207532	0.0207532	1.41422	1.41422	0.941979	0.941979	0.0088232	0.0088232	0.0025861	0.0025861
Trinitrotoluene (TNT) (G.C.)	2-methyl-1,3,5-trinitrobenzene	118-96-7		25	19.5	10	4.5	1.84228e-05	1.84228e-05	0.00359057	0.00359057	0.000428668	0.000428668	0.0207532	0.0207532	1.41422	1.41422	0.941979	0.941979	0.0088232	0.0088232	0.0025861	0.0025861
Triphenyl Phosphate	triphenylphosphate	115-86-6		25	20.1	6.4	6.8	9.6915e-06	9.6915e-06	0.00576225	0.00576225	0.0002768	0.0002768	0.0426947	0.0426947	0.164244	0.164244	0.151525	0.151525	0.000357238	0.000357238	0.000101962	0.000101962
Undecane	n-undecane	1120-21-4	195.9	120	16	0	0	4.25369e-08	0.0454014	0.0688581	34.2634	4.54264e-07	0.0107371	1.59046	33.1742	0.0338137	4.80302	0.0257848	2.19942	1.10865e-05	0.077985	1.35765e-06	0.0156385
Urea For Ro Equal 19.4	urea	57-13-6		25	20.9	18.7	26.4	4.26187e-05	4.26187e-05	1.75982e-07	1.75982e-07	4.43798e-12	4.43798e-12	6.35008e-10	6.35008e-10	8.43906e-14	8.43906e-14	3.17402e-06	3.17402e-06	3.94924e-09	3.94924e-09	1.1898e-09	1.1898e-09
Urea Min Sphere	urea	57-13-6		25	17.6	17.3	16	4.26187e-05	4.26187e-05	1.75982e-07	1.75982e-07	4.43798e-12	4.43798e-12	6.35008e-10	6.35008e-10	8.43906e-14	8.43906e-14	3.17402e-06	3.17402e-06	3.94924e-09	3.94924e-09	1.1898e-09	1.1898e-09
Valeronitrile	valeronitrile	110-59-8	141.3	120	15.3	11	4.8	0.000496792	7.1265	0.0201914	23.8611	0.0282276	14.2851	0.19909	15.5654	1.87672	45.0152	2.53559	30.5782	0.00327965	3.82247	0.00134369	1.5208
Vanillin (4-Hydroxy-3-Methoxy Benzaldehy	4-hydroxy-3-methoxybenzaldehyde	121-33-5	285	120	19.4	9.8	11.2	0.0011	4.13015	0.00375488	5.8536	0.000123797	0.535841	0.0160754	1.95201	0.0426633	7.52313	0.184105	8.0814	0.0570663	2.86603	0.021926	1.17777
Vinyl 2-Chloro Ethyl Ether	(c-chloroethoxy)ethene	110-75-8	109	108	16.3	6.7	5.8	1.94318e-05	0.737577	0.00657037	5.42428	0.00205251	1.89138	0.0372084	3.6224	0.28659	20.3843	0.744552	14.3638	0.00200333	1.51637	0.000550854	0.495033
Vinyl Acetate	vinylacetate	108-05-4	72.5	71.5	16	7.2	5.9	8.48427e-05	0.0360671	0.0185752	0.890289	0.00336716	0.226521	0.189091	2.25262	2.74284	18.5298	1.75678	9.10481	0.00305957	0.194233	0.00107053	0.0688427
Vinyl Acetylene	butenyne	689-97-4	5.1	4.1	16	1.7	8	nan	3.38082e-06	nan	0.002934	nan	0.0623233	nan	0.0641502	nan	2.06914	nan	0.512228	nan	0.0567207	nan	0.0149106
Vinyl Allyl Ether	allylvinylether	3917-15-5		25	14.9	6.5	5.3	2.02016e-05	2.02016e-05	0.0320134	0.0320134	0.00554998	0.00554998	0.433971	0.433971	3.13403	3.13403	1.31771	1.31771	0.00270633	0.00270633	0.000748669	0.000748669
Vinyl Butyl Ether	butylvinylether	111-34-2	94	93	15.2	4.1	5.1	8.65723e-06	0.0636108	0.0666471	9.10078	0.00065185	0.254589	1.47315	20.4467	2.16113	25.3096	0.723015	8.74256	0.00109128	0.341416	0.000271209	0.0946353
Vinyl Butyrate	vinylbutyrate	123-20-6	116	115	15.6	3.9	6.9	2.73283e-05	0.961032	0.0351013	22.914	0.00107224	1.46993	0.570533	24.6477	2.42104	37.4859	1.0259	17.6605	0.00174801	1.74502	0.000544304	0.57298
Vinyl Chloride	chloroethene	75-01-4	-13.3	-14.3	16	6.5	2.4	nan	5.37099e-09	nan	0.000941994	nan	0.00102273	nan	0.109059	nan	2.04482	nan	0.333332	nan	0.000575888	nan	0.000111221
Vinyl Ether	divinylether	109-93-3	28.3	27.3	14.8	4.2	5.8	2.03999e-05	3.04123e-05	0.0245678	0.0306503	0.0192466	0.0239809	0.269215	0.310569	3.56599	4.03888	1.29841	1.44455	0.0111689	0.013933	0.00286812	0.00360041
Vinyl Ethyl Sulfide	ethylvinylsulfide	627-50-9		25	16.4	5.8	6.3	3.61765e-06	3.61765e-06	0.0444743	0.0444743	0.00899605	0.00899605	0.763604	0.763604	5.35705	5.35705	1.597	1.597	0.00192175	0.00192175	0.000437909	0.000437909
Vinyl Formate	vinylformate	692-45-5		25	15.3	6.5	9.7	0.000125921	0.000125921	0.00930994	0.00930994	0.00381114	0.00381114	0.0580822	0.0580822	1.14576	1.14576	1.07286	1.07286	0.00932853	0.00932853	0.00310626	0.00310626
Vinyl Iodide (Iodoethene)	iodoethene	593-66-8	56	55	18	5.5	7.3	1.21691e-06	0.000174246	0.00832789	0.11988	0.00595423	0.0832908	0.0762054	0.444303	1.44676	6.32119	0.729313	2.55527	0.000794599	0.0132752	0.000162947	0.00304769
Vinyl Isobutyl Ether	isobutylvinylether	109-53-5	83	82	15.1	4.1	5.1	3.92701e-06	0.0131795	0.0714489	4.88481	0.000504009	0.0931831	1.63889	15.5164	1.98072	18.5794	0.586211	5.48973	0.000924165	0.141661	0.00020664	0.0363504
Vinyl Isopropyl Ether	2-(ethenyloxy)-propane	926-65-8		25	14.7	3.5	5.2	3.47088e-05	3.47088e-05	0.0512309	0.0512309	0.0030328	0.0030328	0.936152	0.936152	3.5303	3.5303	1.5081	1.5081	0.00234549	0.00234549	0.000693899	0.000693899
Vinyl Propionate	propanoicacidethenylester	105-38-4	91.2	90.2	15.6	8	4.7	4.50391e-05	0.146719	0.0293169	4.40558	0.00205525	0.531502	0.413928	8.8225	3.09224	27.6178	1.38487	12.1988	0.00246046	0.547514	0.00080546	0.184106
Vinyl Propyl Ether	1-(ethenyloxy)propane	764-47-6	65	64	14.9	3.5	5.2	1.4841e-05	0.00382432	0.068412	1.49332	0.00171235	0.0651338	1.49	8.2637	3.76646	16.6692	1.1338	5.10305	0.00190259	0.0689021	0.000499508	0.0191126
Vinyl Pyrrolidone	1-vinyl-2-pyrrolidinone	88-12-0	148	120	16.4	9.3	5.9	0.00363749	9.61189	0.0128095	14.5631	0.00663121	5.02442	0.109809	7.68351	1.26134	33.2948	2.58388	24.9098	0.00285275	2.48321	0.00139825	1.07565
Vinyl Trimethyl Silane	ethenyltrimethylsilane	754-05-2	55	54	14.5	1	2.5	3.65768e-07	6.07101e-05	0.101772	0.986997	5.48062e-05	0.00131762	2.71053	8.39951	0.693683	3.14594	0.194035	0.796177	0.000197979	0.00407408	3.16097e-05	0.000752955
Vinylenecarbonate	1,3-dioxol-2-one	872-36-6		25	17.3	18.1	9.6	0.000235937	0.000235937	0.000826525	0.000826525	0.000173095	0.000173095	0.00124772	0.00124772	0.0187849	0.0187849	0.169538	0.169538	0.00952462	0.00952462	0.00312678	0.00312678
Water	h2o	7732-18-5	100	99	15.5	16	42.3	5.70953e-05	0.0242914	7.0456e-08	6.41153e-05	8.4399e-19	2.46969e-14	8.37756e-11	2.13922e-08	7.93071e-18	6.04658e-14	2.81139e-08	7.62151e-06	1.01576e-06	1.6804e-06	2.63474e-07	5.75099e-07
Water 1% Soluble In - Ro=18.1	h2o	7732-18-5	100	99	15.1	20.4	16.5	5.70953e-05	0.0242914	7.0456e-08	6.41153e-05	8.4399e-19	2.46969e-14	8.37756e-11	2.13922e-08	7.93071e-18	6.04658e-14	2.81139e-08	7.62151e-06	1.01576e-06	1.6804e-06	2.63474e-07	5.75099e-07
Water Complete Misc. (R=13.0)	h2o	7732-18-5	100	99	18.1	17.1	16.9	5.70953e-05	0.0242914	7.0456e-08	6.41153e-05	8.4399e-19	2.46969e-14	8.37756e-11	2.13922e-08	7.93071e-18	6.04658e-14	2.81139e-08	7.62151e-06	1.01576e-06	1.6804e-06	2.63474e-07	5.75099e-07
Xylene	1,4-dimethylbenzene	106-42-3	138.3	120	17.8	1	3.1	1.40598e-06	0.490741	0.0586918	38.5742	0.00110203	2.18584	1.243	38.3335	2.3443	41.1844	0.50303	15.0873	0.000778958	1.56376	0.000156331	0.417585
ß-Propiolactone	beta-propiolactone	57-57-8	162	120	17	18.2	9	0.000116903	4.31648	0.000685794	1.51993	0.000111979	0.407877	0.000804574	0.204877	0.00881417	1.99177	0.525581	13.0728	8.79561e-05	0.367691	3.56004e-05	0.149791
α-Chloro Acetophenone	2-chloroacetophenone	532-27-4		25	20	9.6	5.7	6.88218e-05	6.88218e-05	0.00299026	0.00299026	0.000765275	0.000765275	0.011507	0.011507	0.0629156	0.0629156	0.241392	0.241392	0.00154524	0.00154524	0.000496503	0.000496503
α-Chloro Methyl Acrylate	methyl2-chloroacrylate	80-63-7	135	120	15.9	7.3	8.5	3.8254e-05	2.08213	0.0120412	19.425	0.00141019	2.64882	0.108937	12.5803	1.09654	35.7479	0.943742	19.7174	0.00215081	2.65677	0.00068792	0.929513
γ-Butyrolactone (GBL)	gamma-butyrolactone	96-48-0	204	120	18	16.6	7.4	0.00166928	10.5762	0.00521171	5.32384	0.00388466	2.86491	0.0240179	1.5885	0.495654	16.8514	3.54102	26.0044	0.00140682	1.52161	0.000678248	0.680037
γ-Thiobutyrolactone	dihydrothiophen-2(3h)-one	1003-10-7		25	19	6.9	6.2	0.000106512	0.000106512	0.00811625	0.00811625	0.00673807	0.00673807	0.0531888	0.0531888	1.42031	1.42031	2.79666	2.79666	0.00133454	0.00133454	0.000500305	0.000500305
1,4-dichloro-2-butyne	1,4-dichloro-2-butyne	821-10-3	165.5	120	17.8	7.6	2	7.47131e-05	3.68159	0.00549324	10.4591	0.0303236	8.00321	0.030901	4.43037	0.492007	27.4154	0.705458	17.018	0.0496494	7.61529	0.0132117	2.91627
1,2-dibromoethylene	trans-dibromoethene	590-12-5	108	107	18	4.9	3	1.63757e-06	0.0587358	0.00336184	2.76275	0.0228614	2.87113	0.0176587	1.7511	0.513598	19.3589	0.0771568	2.99786	0.00174604	0.370787	0.000360715	0.0956044
o-xylene	1,2-dimethylbenzene	95-47-6	144.5	120	17.8	1	3.1	1.57312e-06	0.527681	0.053989	37.8022	0.00138526	2.51221	1.08928	37.2433	2.44579	41.4729	0.535118	15.5083	0.000843542	1.64887	0.000172925	0.446456
dipropyleneglycolmethylether	dipropyleneglycolmonomethylether	34590-94-8	188.3	120				0.0167373	9.26946	0.0193264	17.6683	0.00224655	2.05868	0.23462	12.0248	1.29721	28.8712	2.67158	22.0425	0.00304651	1.96068	0.00161117	0.852007
butadienedioxide	1,2-3,4-diepoxybutane	564-00-1	144	120	18.3	14.4	6.2	0.000326557	5.95225	0.00322524	5.30147	0.000947053	1.82025	0.0106245	1.44298	0.135075	14.8789	1.34784	21.3501	0.000566552	1.25106	0.000238747	0.50964
propylenechlorohydrin	2-chloro-1-propanol	78-89-7	133	120				0.00224812	8.96362	0.00788666	14.0819	0.000209958	1.6021	0.0461686	6.36976	0.055724	17.9436	0.435487	18.4003	0.0275458	5.54523	0.0108532	2.34479
dimethylmethylphosphonate	dimethylmethylphosphonate	765-79-6	181	120				0.0297471	15.5509	0.00491465	4.38593	0.00189892	1.45848	0.0239536	1.33041	0.275937	9.92318	2.67336	20.6087	0.00224549	1.22072	0.0011801	0.588591
ethylamylketone	5-methyl-3-heptanone	541-85-5	159	120				0.000343585	2.63477	0.0456716	31.8831	0.000724194	1.21798	0.879039	30.0797	1.60789	34.2058	1.20503	18.1906	0.00144397	1.56498	0.000595404	0.560797
propyleneglycolmonophenylether	propyleneglycolmonophenylether	4169-04-4	244	120				0.000605728	3.26792	0.0100551	13.1206	0.000384047	1.19868	0.0782588	6.94076	0.151134	17.1117	0.307125	11.2135	0.00692506	2.3149	0.00271382	0.873972
dipropyleneglycol	dipropyleneglycol	25265-71-8	230.5	120				0.00835387	10.1182	0.0135454	14.7994	0.00014262	0.764704	0.120351	8.4936	0.115789	16.125	0.752241	17.2142	0.00264425	1.98439	0.00136175	0.876384
di-n-butylsulfoxide	1,1'-sulfonylbisbutane	598-04-9	291	120				0.000366125	3.81692	0.00834597	9.14373	0.000297211	0.638718	0.0612698	4.2893	0.123973	10.8182	0.74319	13.6281	0.000925816	0.991946	0.000408656	0.402394
vinylaceticacid	3-butenoicacid	625-38-7	163	120				0.0834874	19.4431	0.00237932	4.08319	0.000126897	0.575488	0.0059152	0.914384	0.00456455	1.97492	0.0926001	6.43435	nan	22.2386	15.0123	14.1599
hexyleneglycol	2-methyl-2,4-pentanediol	107-41-5	198	120				0.00390481	8.27196	0.011952	12.1012	9.3465e-06	0.146724	0.0894521	5.6216	0.0172181	3.86662	0.173323	7.8776	0.00234425	1.85975	0.00113507	0.79288
crotonaldehyde	cis-crotonaldehyde	15798-64-8		25	16.2	14.9	7.4	0.00341535	0.00341535	0.0153539	0.0153539	0.0213126	0.0213126	0.126776	0.126776	3.40309	3.40309	4.75484	4.75484	0.00507441	0.00507441	0.00245808	0.00245808
2,3-dimethyl-1-butene	2,3-dimethyl-1-butene	563-78-0	55.6	54.6	14.9	1.2	2.8	4.67839e-07	8.44921e-05	0.121165	1.22753	9.03048e-05	0.00231607	3.37908	10.5193	1.19402	5.35918	0.25264	1.06599	0.000255729	0.00568647	4.16978e-05	0.00107
ethylcinnamate	ethylcinnamate			25				6.04813e-05	6.04813e-05	0.0122209	0.0122209	0.000772428	0.000772428	0.116569	0.116569	0.532973	0.532973	0.446767	0.446767	0.000882032	0.000882032	0.000301524	0.000301524
dimethylethanolamine	dimethylethanolamine	2854-16-2		25				0.0401133	0.0401133	0.0130289	0.0130289	0.000624039	0.000624039	0.0957764	0.0957764	0.0808861	0.0808861	0.663383	0.663383	0.00481506	0.00481506	0.0023178	0.0023178
propyleneglycolmonoethylether	1,2-propanediolmonoethylether	52125-53-8		25				0.00233078	0.00233078	0.0196414	0.0196414	4.29011e-05	4.29011e-05	0.196232	0.196232	0.0584147	0.0584147	0.203494	0.203494	0.0363166	0.0363166	0.0156378	0.0156378
dioctylphthalate	1,2-benzenedicarboxylicaciddioctylester	117-84-0		25				7.38005e-06	7.38005e-06	0.0194258	0.0194258	3.82874e-05	3.82874e-05	0.312901	0.312901	0.185298	0.185298	0.160437	0.160437	0.000180644	0.000180644	5.28713e-05	5.28713e-05
isopropylpalmitate	isopropylpalmitate			25				6.39527e-06	6.39527e-06	0.0337403	0.0337403	7.75907e-06	7.75907e-06	0.668836	0.668836	0.107999	0.107999	0.110537	0.110537	7.90601e-05	7.90601e-05	2.16553e-05	2.16553e-05
glutaric anhydride	dihydro-2h-pyran-2,6(3h)-dione	108-55-4	287	120				3.4411e-05	1.6453	0.000279032	0.637091	6.78774e-06	0.0356906	0.000209838	0.0590532	0.000691546	0.201256	0.147705	4.46191	1.99454e-05	0.0859468	7.74672e-06	0.0344491
GVL	dihydro-5-methyl-2(3h)-furanone	108-29-2		25				0.00165967	0.00165967	0.00863677	0.00863677	0.00396675	0.00396675	0.0569972	0.0569972	0.793144	0.793144	3.52611	3.52611	0.00201032	0.00201032	0.000973514	0.000973514
chloromethyl methyl ether	chloromethoxymethane	107-30-2	59.5	58.5				3.73768e-05	0.00555949	0.00427347	0.101659	0.00171787	0.0521121	0.017442	0.170899	0.198784	1.90953	0.979043	4.18507	0.00196229	0.0519447	0.000584017	0.0165325
chloromethyl acetate	chloromethacetate	625-56-9		25				6.20563e-05	6.20563e-05	0.00382829	0.00382829	0.000587415	0.000587415	0.0160464	0.0160464	0.134526	0.134526	0.644373	0.644373	0.00232938	0.00232938	0.000747691	0.000747691
bromodichloromethane	chcl2br	75-27-4	90	89				0.00016254	0.127712	0.0115371	1.86033	0.261177	3.04681	0.129476	3.42742	1.84245	17.5169	0.404242	5.0051	1.14062	3.77834	0.35537	1.42756
chlorofluoromethane	ch2fcl	593-70-4	-9.1	-10.1				nan	7.81854e-07	nan	0.000298212	nan	0.0443231	nan	0.0114259	nan	0.78286	nan	0.556229	nan	0.0574097	nan	0.0138571
chloroiodomethane	ch2cli	593-71-5	109	108				1.11785e-05	0.280365	0.00285424	2.74093	0.00959115	2.34923	0.0141316	1.64116	0.24621	17.1786	0.591924	10.9477	0.00778038	1.30933	0.00186401	0.389254
carbon tetrafluoride	cf4	75-73-0	-128	-129				nan	nan	nan	2.59803e-17	nan	nan	nan	1.33391e-12	nan	3.03778e-23	nan	1.76183e-17	nan	nan	nan	nan
camphor	camphor	76-22-2	204	120				0.000390589	2.78465	0.0367669	27.2848	0.000774802	1.11376	0.678196	24.9072	1.48962	30.4324	1.4282	17.6205	0.00136752	1.40567	0.000598813	0.526097
butyl isobutyrate	butylisobutyrate	97-87-0		25				9.09668e-05	9.09668e-05	0.046356	0.046356	0.000351001	0.000351001	0.942573	0.942573	1.5103	1.5103	0.951196	0.951196	0.00093752	0.00093752	0.000350639	0.000350639
bromoacetic acid	bromoaceticacid	79-08-3	208	120				0.325399	15.2566	0.00011807	0.417181	0.001025	0.49965	5.89013e-05	0.0343891	0.000119187	0.137958	0.00889131	1.27862	nan	19.8229	nan	13.3562
alpha-terpineol	alpha-terpineol	98-55-5	220	120				0.000578103	2.72664	0.0255806	22.5794	2.7441e-05	0.307757	0.342028	17.6874	0.0581405	11.7979	0.115579	7.51426	0.00644289	2.10412	0.00257068	0.773411
n-allylmethylamine	allylmethylamine	627-37-2		25				1.18635	1.18635	0.0603153	0.0603153	0.010553	0.010553	1.10108	1.10108	3.55958	3.55958	2.25708	2.25708	0.0166344	0.0166344	0.00875289	0.00875289
2-aminobutan-1-ol	2-amino-1-butanol	96-20-8	176	120				0.0337396	17.6155	0.0168123	20.3936	0.00124079	3.63803	0.146749	12.1525	0.196267	28.5202	1.18065	25.3887	0.00558299	3.96636	0.00280689	1.79468
benzyl formate	benzylformate	104-57-4	203	120				5.48387e-05	2.01668	0.00490123	8.30768	0.000731275	1.46237	0.0241639	3.15504	0.17737	17.9786	0.443095	12.5021	0.000831503	1.28104	0.000284071	0.457632

## Sheet: Solvent Info
Solvent name	Solvent name in cosmobase	CAS number	SMILES	Classes
1,1,1,2-Tetrachloroethane	1,1,1,2-tetrachloroethane	630-20-6	ClCC(Cl)(Cl)Cl	AlkylHalide
1,1,1-Trichloroethane	1,1,1-trichloroethane	71-55-6	CC(Cl)(Cl)Cl	AlkylHalide
1,1,1-Trifluoroethane	1,1,1-trifluoroethane	420-46-2	FC(F)(F)C	AlkylHalide
1,1,2,2-Tetrabromoethane	1,1,2,2-tetrabromoethane	79-27-6	BrC(Br)C(Br)Br	AlkylHalide
1,1,2,2-Tetrachloroethane	1,1,2,2-tetrachloroethane	79-34-5	ClC(Cl)C(Cl)Cl	AlkylHalide
1,1,2-Trichloroethane	1,1,2-trichloroethane	79-00-5	ClCC(Cl)Cl	AlkylHalide
1,1,2-Trichlorotrifluoroethane (Freon113)	1,1,2-trichloro-1,2,2-trifluoroethane	76-13-1	FC(F)(Cl)C(F)(Cl)Cl	AlkylHalide
1,1,3,3-Tetramethoxypropane	1,1,3,3-tetramethoxypropane	102-52-3	COC(OC)CC(OC)OC	Ether
1,1-Dibromoethane	1,1-dibromoethane	557-91-5	CC(Br)Br	AlkylHalide
1,1-Dichloro-1-Nitroethane	1,1-dichloro-1-nitroethane	594-72-9	CC(Cl)(Cl)N(=O)=O	Nitrogen	AlkylHalide
1,1-Dichloroacetone	1,1-dichloroacetone	513-88-2	ClC(Cl)C(C)=O	Ketone	AlkylHalide
1,1-Dichloroethane	1,1-dichloroethane	75-34-3	CC(Cl)Cl	AlkylHalide
1,1-Dichloroethylene	1,1-dichloroethylene	75-35-4	ClC(Cl)=C	Alkene
1,1-Dichloropropane	1,1-dichloropropane	78-99-9	CCC(Cl)Cl	AlkylHalide
1,1-Dichloropropene	1,1-dichloropropene	563-58-6	CC=C(Cl)Cl	Alkene
1,1-Diethoxy Ethane	1,1-diethoxyethane	105-57-7	CCOC(C)OCC	Ether
1,1-Difluoroethane	1,1-difluoroethane	75-37-6	FC(F)C	AlkylHalide
1,1-Difluoroethylene	1,1-difluoroethene	75-38-7	FC(F)=C	Alkene
1,1-Dimethoxy Ethane	1,1-dimethoxyethane	534-15-6	COC(C)OC	Ether
1,1-Dimethyl Hydrazine	1,1-dimethylhydrazine	57-14-7	CN(C)N	Amine
1,2,3,4-Tetramethylbenzene	1,2,3,4-tetramethylbenzene	488-23-3	Cc1ccc(C)c(C)c1C	Aromatics
1,2,3,5-Tetramethylbenzene	1,2,3,5-tetramethylbenzene	527-53-7	Cc(cc1C)cc(C)c1C	Aromatics
1,2,3-Benzotriazole	1h-benzotriazole	95-14-7	c2cc1nn[nH]c1cc2	Aromatics
1,2,3-Triazole	1h-1,2,3-triazole	288-36-8	n1n[nH]cc1	Aromatics
1,2,3-Trichloro Propene	1,2,3-trichloropropene	96-19-5	ClCC(Cl)=CCl	Alkene	AlkylHalide
1,2,3-Trichloropropane	1,2,3-trichloropropane	96-18-4	ClCC(Cl)CCl	AlkylHalide
1,2,4,5-Tetrachlorobenzene	1,2,4,5-tetrachlorobenzene	95-94-3	Clc1cc(Cl)c(Cl)cc1Cl	Aromatics
1,2,4-Trichlorobenzene	1,2,4-trichlorobenzene	120-82-1	Clc(ccc1Cl)cc1Cl	Aromatics
1,2-Butadiene	1,2-butadiene	590-19-2	CC=C=C	Alkene
1,2-Chlorobromoethylene	1-bromo-2-chloroethene	3018-09-5	ClC=CBr	Alkene
1,2-Cyclohexanedione	1,2-cyclohexanedione	765-87-7	O=C1CCCCC1=O	Ketone
1,2-Dibromoethylene	cis-dibromoethene	540-49-8	BrC=CBr	Alkene
1,2-Dichloroethylene (Cis)	cis-1,2-dichloroethene	156-59-2	ClC=CCl	Alkene
1,2-Dichloropropane	1,2-dichloropropane	78-87-5	ClCC(C)Cl	AlkylHalide
1,2-Dichlorotetrafluoroethane (Freon 114)	1,2-dichlorotetrafluoroethane	76-14-2	FC(F)(Cl)C(F)(F)Cl	AlkylHalide
1,2-Diethyl Benzene	1,2-diethylbenzene	135-01-3	CCc1ccccc1CC	Aromatics
1,2-Dihydroxybenzene (Catechol)	1,2-benzenediol	120-80-9	Oc1ccccc1O	Aromatics
1,2-Dimethoxybenzene	1,2-dimethoxybenzene	91-16-7	COc1ccccc1OC	Ether	Aromatics
1,2-Dinitrobenzene	o-dinitrobenzene	528-29-0	O=N(=O)c1ccccc1N(=O)=O	Nitrogen	Aromatics
1,2-Ethane Dithiol	1,2-ethanedithiol	540-63-6	SCCS	Sulfide
1,2-Methylenedioxybenzene (G.C.)	1,3-benzodioxole	274-09-9	C(Oc1cc2)Oc1cc2	Ether
1,2-Propadiene (Allene)	propadiene	463-49-0	C=C=C	Alkene
1,3,5-Trioxane	1,3,5-trioxane	110-88-3	C1OCOCO1	Ether
1,3-Benzenediol	resorcinol	108-46-3	Oc1cc(O)ccc1	Aromatics
1,3-Bis(Trifluoromethyl)Benzene	1,3-bis-(triflouromethyl)-benzene	402-31-3	FC(F)(F)c1cc(C(F)(F)F)ccc1	Aromatics	AlkylHalide
1,3-Butadiene	butadiene	106-99-0	C=CC=C	Alkene
1,3-Butadiene-1-Chloro	1-chloroprene	627-22-5	ClC=CC=C	Alkene
1,3-Butanediol	1,3-butanediol	107-88-0	OCCC(O)C	Alcohol
1,3-Dichloro Propane	1,3-dichloropropane	142-28-9	ClCCCCl	AlkylHalide
1,3-Dichloro-2-Butene	1,3-dichloro-2-butene	926-57-8	ClCC=C(C)Cl	Alkene	AlkylHalide
1,3-Dichloro-2-Propanol	1,3-dichloro-2-propanol	96-23-1	ClCC(O)CCl	Alcohol	AlkylHalide
1,3-Dioxolane	dioxolane	646-06-0	C1OCCO1	Ether
1,3-Pentadiene (Trans)	1-trans-3-pentadiene	2004-70-8	CC=CC=C	Alkene
1,3-Propane Sultone	propanesultone	1120-71-4	O=S1(CCCO1)=O	Alkane
1,3-Propanediol (Trimethyleneglycol)	1,3-propanediol	504-63-2	OCCCO	Alcohol
1,4-Butanediol	1,4-butadiol	110-63-4	OCCCCO	Alcohol
1,4-Dichlorobutane	1,4-dichlorobutane	110-56-5	ClCCCCCl	AlkylHalide
1,4-Dihydroxybenzene (1,4-Benzenediol)	hydroquinone	123-31-9	Oc1ccc(O)cc1	Aromatics
1,4-Dioxane	dioxane	123-91-1	C1OCCOC1	Ether
1,4-Dioxane (High P)	dioxane	123-91-1	C1OCCOC1	Ether
1,4-Thioxane	1,4-oxathiane	15980-15-1	O1CCSCC1	Sulfide	Ether
1,5-Dichloropentane	1,5-dichloro-pentane	628-76-2	ClCCCCCCl	AlkylHalide
1,8-Cineole (Eucalyptol)	1,8-cineole	470-82-6	CC2(CCC1CC2)OC1(C)C	Ether
1,9-Nonanediol	1-9-nonanediol	3937-56-2	OCCCCCCCCCO	Alcohol
1-Aminocyclopropane Carboxylic Acid	1-aminocyclopropanecarboxylicacid	22059-21-8	NC1(CC1)C(O)=O	Carboxylic Acid	Amine
1-Bromonaphthalene	1-bromonaphthalene	90-11-9	Brc2c1ccccc1ccc2	Aromatics
1-Bromopropane	1-bromopropane	106-94-5	CCCBr	AlkylHalide
1-Butanethiol	butanethiol	109-79-5	CCCCS	Sulfide
1-Butanol	1-butanol	71-36-3	OCCCC	Alcohol
1-Butene	1-butene	106-98-9	CCC=C	Alkene
1-Chloro Pentane	1-chloropentane	543-59-9	CCCCCCl	AlkylHalide
1-Chloro-1-Nitroethane	1-chloro-1-nitroethane	598-92-5	CC(Cl)N(=O)=O	Nitrogen	AlkylHalide
1-Chloro-1-Nitropropane	1-chloro-1-nitropropane	600-25-9	CCC(Cl)N(=O)=O	Nitrogen	AlkylHalide
1-Chloro-2-Ethoxy Benzene	1-chloro-2-ethoxybenzene	614-72-2	CCOc1ccccc1Cl	Ether	Aromatics
1-Chloro-2-Ethyl Benzene	1-chloro-2-ethylbenzene	89-96-3	CCc1ccccc1Cl	Aromatics
1-Chloro-2-Methyl Propene	1-chloro-2-methyl-1-propene	513-37-1	ClC=C(C)C	Alkene
1-Chloro-4-Ethoxy Benzene	1-chloro-4-ethoxybenzene	622-61-7	CCOc1ccc(Cl)cc1	Ether	Aromatics
1-Chlorobutane	1-chlorobutane	109-69-3	CCCCCl	AlkylHalide
1-Chlorohexane	1-chlorohexane	544-10-5	CCCCCCCl	AlkylHalide
1-Chloronaphthalene	1-chloronaphthalene	90-13-1	Clc2c1ccccc1ccc2	Aromatics
1-Chloropropene	1-chloro-1-propene	590-21-6	CC=CCl	Alkene
1-Decanol	1-decanol	112-30-1	OCCCCCCCCCC	Alcohol
1-Decene	1-decene	872-05-9	CCCCCCCCC=C	Alkene
1-Heptanol	1-heptanol	111-70-6	OCCCCCCC	Alcohol
1-Heptene	1-heptene	592-76-7	CCCCCC=C	Alkene
1-Hexanol	1-hexanol	111-27-3	OCCCCCC	Alcohol
1-Hexene	1-hexene	592-41-6	CCCCC=C	Alkene
1-Methoxy-1,3-Butadiene	1-methoxy-1,3-butadiene	3036-66-6	COC=CC=C	Alkene	Ether
1-Methoxy-2-Nitrobenzene	1-methoxy-2-nitrobenzene	91-23-6	COc1ccccc1N(=O)=O	Ether	Nitrogen	Aromatics
1-Methyl Cyclohexanol	1-methylcyclohexanol	590-67-0	OC1(C)CCCCC1	Alcohol
1-Methyl Imidazole	1-methylimidazol	616-47-7	Cn1ccnc1	Aromatics
1-Methyl Naphthalene	1-methylnaphthalene	90-12-0	Cc2c1ccccc1ccc2	Aromatics
1-Methyl Vinyl Methyl Ether	2-methoxy-1-propene	116-11-0	COC(C)=C	Ether
1-Naphthol	1-naphthol	90-15-3	Oc2c1ccccc1ccc2	Aromatics
1-Nitropropane	1-nitropropane	108-03-2	CCCN(=O)=O	Nitrogen
1-Nonanol	1-nonanol	143-08-8	OCCCCCCCCC	Alcohol
1-Nonene	1-nonene	124-11-8	CCCCCCCC=C	Alkene
1-Octanol	1-octanol	111-87-5	OCCCCCCCC	Alcohol
1-Octene	octene	111-66-0	CCCCCCC=C	Alkene
1-Pentanol	1-pentanol	71-41-0	OCCCCC	Alcohol
1-Pentene	pentene	109-67-1	CCCC=C	Alkene
1-Propanethiol	1-propanethiol	107-03-9	CCCS	Sulfide
1-Propanol	propanol	71-23-8	OCCC	Alcohol
1-Tetradecene	1-tetradecene	1120-36-1	CCCCCCCCCCCCC=C	Alkene
2,2',5,5'-Tetrathiafulvalen	tetrathiafulvalene	31366-25-3	S1C=CSC1=C2SC=CS2	Sulfide	Ether
2,2,2-Trifluoro Ethanol	2,2,2-trifluoroethanol	75-89-8	OCC(F)(F)F	Alcohol	AlkylHalide
2,2,4-Trimethylpentane	2,2,4-trimethylpentane	540-84-1	CC(C)CC(C)(C)C	Alkane
2,2-Dimethyl-1-Propanol (Neopentyl Alc.)	2,2-dimethyl-1-propanol	75-84-3	OCC(C)(C)C	Alcohol
2,3-Benzofuran (Cumaron)	benzofuran	271-89-6	c2cc1ccoc1cc2	Aromatics
2,3-Dichloro-1,3-Butadiene	2,3-dichlorobuta-1,3-diene	1653-19-6	ClC(=C)C(Cl)=C	Alkene
2,3-Dichloropropanol	2,3-dichloro-1-propanol	616-23-9	OCC(Cl)CCl	Alcohol	AlkylHalide
2,3-Dichloropropene	2,3-dichloro-1-propene	78-88-6	ClCC(Cl)=C	Alkene	AlkylHalide
2,4,6-Tribromo Phenol	2,4,6-tribromo-phenol	118-79-6	Brc(cc1Br)cc(Br)c1O	Aromatics
2,4,6-Trichlorophenol	2,4,6-trichlorophenol	88-06-2	Clc(cc1Cl)cc(Cl)c1O	Aromatics
2,4-Dichloroaniline	2,4-dichloroaniline	554-00-7	Clc(ccc1N)cc1Cl	Amine	Aromatics
2,4-Dichlorophenol	2,4-dichlorophenol	120-83-2	Clc(ccc1O)cc1Cl	Aromatics
2,4-Difluoronitrobenzene	2,4-difluoro-1-nitrobenzene	446-35-5	Fc(ccc1N(=O)=O)cc1F	Nitrogen	Aromatics
2,4-Dimethylaniline	2,4-dimethylaniline	95-68-1	Cc(ccc1N)cc1C	Amine	Aromatics
2,4-Dinitrotoluene	1-methyl-2,4-dinitrobenzene	121-14-2	Cc1ccc(cc1N(=O)=O)N(=O)=O	Nitrogen	Aromatics
2,5-Dichlorophenol	2,5-dichlorophenol	583-78-8	Clc(ccc1Cl)cc1O	Aromatics
2,5-Dimethoxytetrahydrofuran	dimethoxytetrahydrofuran	696-59-3	COC1OC(OC)CC1	Ether
2,5-Dimethyl Pyrrole	2,5-dimethylpyrrole	625-84-3	Cc1[nH]c(C)cc1	Aromatics
2,6-Dichlorophenol	2,6-dichlorophenol	87-65-0	Clc1cccc(Cl)c1O	Aromatics
2,6-Difluorobenzonitrile	2,6-difluorobenzonitrile	1897-52-5	Fc1cccc(F)c1C#N	Nitrile	Aromatics
2,6-Dimethoxy Phenol	2,6-dimethoxyphenol	91-10-1	COc1cccc(OC)c1O	Ether	Aromatics
2,6-Dimethyl Phenol	2,6-dimethylphenol	576-26-1	Cc1cccc(C)c1O	Aromatics
2-(Diethylamino)Ethanol	2-(diethylamino)-ethanol	100-37-8	OCCN(CC)CC	Alcohol	Amine
2-Acetyl Thiophene	2-acetothiophene	88-15-3	CC(=O)c1sccc1	Ketone	Aromatics
2-Amino Pyridine	2-aminopyridine	504-29-0	Nc1ccccn1	Aromatics
2-Bromo Propene	2-bromopropene	557-93-7	CC(Br)=C	Alkene
2-Bromobutane	2-bromobutane	78-76-2	CCC(C)Br	AlkylHalide
2-Bromopropane	2-bromopropane	75-26-3	CC(C)Br	AlkylHalide
2-Bromothiophene	2-bromothiophene	1003-09-4	Brc1sccc1	Aromatics
2-Butanol	2-butanol	78-92-2	CCC(O)C	Alcohol
2-Butene (Cis)	cis-2-butene	590-18-1	CC=CC	Alkene
2-Butene (Trans)	trans-2-butene	624-64-6	CC=CC	Alkene
2-Butynedinitrile	2-butynedinitrile	1071-98-3	N#CC#CC#N	Nitrile	Alkyne
2-Chloro Propene (Isopropenyl Chloride)	2-chloro-1-propene	557-98-2	CC(Cl)=C	Alkene
2-Chloro-2-Methyl Propane	2-chloro-2-methylpropane	507-20-0	CC(C)(C)Cl	AlkylHalide
2-Chloro-4-Methylaniline	2-chloro-4-methylbenzenamine	615-65-6	Cc(ccc1N)cc1Cl	Amine	Aromatics
2-Chloro-5-Methyl Phenol	2-chloro-5-methylphenol	615-74-7	Cc(ccc1Cl)cc1O	Aromatics
2-Chloroacetamide	2-chloroacetamide	79-07-2	ClCC(=O)N	Amide	AlkylHalide
2-Chlorobutane	2-chlorobutane	78-86-4	CCC(C)Cl	AlkylHalide
2-Chlorocyclohexanone	2-chlorocyclohexanone	822-87-7	ClC1CCCCC1=O	Ketone	AlkylHalide
2-Chloroethyl Acetate	2-chloroethanolacetate	542-58-5	ClCCOC(C)=O	Ester	AlkylHalide
2-Chloroethyl Benzene	b-phenylethylchloride	622-24-2	ClCCc1ccccc1	Aromatics	AlkylHalide
2-Chloroethyl Ethyl Ether	2-chloroethylethylether	628-34-2	CCOCCCl	Ether	AlkylHalide
2-Chloroethyl Ethyl Sulfide	2-chloroethylethylsulfide	693-07-2	CCSCCCl	Sulfide	Ether	AlkylHalide
2-Chlorophenol	2-chlorophenol	95-57-8	Oc1ccccc1Cl	Aromatics
2-Chlorothiophene	2-chlorothiophene	96-43-5	Clc1sccc1	Aromatics
2-Ethyl Hexyl Acetate	aceticacid-2-ethylhexylester	103-09-3	CCCCC(CC)COC(C)=O	Ester
2-Ethyl Hexyl Acrylate	2-propenoicacid-2-ethylhexylester	103-11-7	CCCCC(CC)COC(=O)C=C	Ester	Alkene
2-Ethyl-1-Butanol	2-ethyl-1-butanol	97-95-0	OCC(CC)CC	Alcohol
2-Ethyl-1-Butene	2-ethyl-1-butene	760-21-4	CCC(CC)=C	Alkene
2-Ethyl-Hexanol	2-ethyl-1-hexanol	104-76-7	CCCCC(CO)CC	Alcohol
2-Furonitrile	2-furancarbonitrile	617-90-3	N#Cc1occc1	Nitrile	Aromatics
2-Heptanol	2-heptanol	543-49-7	CCCCCC(O)C	Alcohol
2-Methyl (Cis) Acrylic Acid	(z)-2-butenoicacid	503-64-0	CC=CC(O)=O	Carboxylic Acid	Alkene
2-Methyl Cyclohexanol (Mix)	2-methylcyclohexanol	583-59-5	OC1CCCCC1C	Alcohol
2-Methyl Cyclohexanone	2-methylcyclohexanone	583-60-8	CC1CCCCC1=O	Ketone
2-Methyl Pyrazine	2-methylpyrazine	109-08-0	Cc1cnccn1	Aromatics
2-Methyl Tetrahydrofuran	2-methyltetrahydrofuran	96-47-9	CC1CCCO1	Ether
2-Methyl-1,3-Dioxolane	methyldioxolane	497-26-7	CC1OCCO1	Ether
2-Methyl-1-Butanol	2-methyl-1-butanol	137-32-6	OCC(C)CC	Alcohol
2-Methyl-1-Butene	2-methyl-1-butene	563-46-2	CCC(C)=C	Alkene
2-Methyl-1-Chloro Acrolein	2-chloro-2-butenal	53175-28-3	CC=C(Cl)C=O	Aldehyde	Alkene
2-Methyl-1-Pentanol	2-methyl-1-pentanol	105-30-6	CCCC(C)CO	Alcohol
2-Methyl-2-Butanol	2-methyl-2-butanol	75-85-4	CCC(O)(C)C	Alcohol
2-Methyl-2-Butene	2-methyl-2-butene	513-35-9	CC=C(C)C	Alkene
2-Methylfuran	2-methylfuran	534-22-5	Cc1occc1	Aromatics
2-Nitropropane	2-nitropropane	79-46-9	CC(C)N(=O)=O	Nitrogen
2-Nitrothiophene	2-nitrothiophene	609-40-5	O=N(=O)c1sccc1	Nitrogen	Aromatics
2-Octanol	2-octanol	123-96-6	CCCCCCC(O)C	Alcohol
2-Oxopyrrolidinacetamid	piracetam	7491-74-9	O=C(CN1CCCC1=O)N	Amide
2-Pentanol	2-pentanol	6032-29-7	CCCC(O)C	Alcohol
2-Phenoxy Ethanol	2-phenoxyethanol	122-99-6	OCCOc1ccccc1	Alcohol	Ether	Aromatics
2-Phenyl Ethanol	2-phenylethanol	60-12-8	OCCc1ccccc1	Alcohol	Aromatics
2-Propanethiol	2-propanethiol	75-33-2	CC(C)S	Sulfide
2-Propanol	2-propanol	67-63-0	OC(C)C	Alcohol
2-Propyn-1-ol	propynol	107-19-7	OCC#C	Alcohol	Alkyne
2-Pyrrolidone	2-pyrrolidon	616-45-5	O=C1NCCC1	Amide
2-t-Butyl-4-Methyl Phenol	2-(1,1-dimethylethyl)-4-methylphenol	2409-55-4	CC(C)(C)c1cc(C)ccc1O	Aromatics
2-Thiabutane	(methylthio)-ethane	624-89-5	CCSC	Sulfide	Ether
2-Toluidine	2-methyl-benzeneamine	95-53-4	Nc1ccccc1C	Amine	Aromatics
2-Vinyl Toluene	2-vinyltoluene	611-15-4	Cc1ccccc1C=C	Alkene	Aromatics
3,3,3-Trichloro Propene	3,3,3-trichloro-1-propene	2233-00-3	ClC(Cl)(Cl)C=C	Alkene	AlkylHalide
3,4-Dichloronitrobenzene	3,4-dichloronitrobenzene	99-54-7	Clc1ccc(cc1Cl)N(=O)=O	Nitrogen	Aromatics
3,4-Dichlorotoluene	3,4-dichlorotoluene	95-75-0	Cc(ccc1Cl)cc1Cl	Aromatics
3,4-Dimethyl Phenol	3,4-dimethylphenol	95-65-8	Oc(ccc1C)cc1C	Aromatics
3,4-Dinitrophenol	3,4-dinitrophenol	577-71-9	Oc(ccc1N(=O)=O)cc1N(=O)=O	Nitrogen	Aromatics
3,4-Epoxy-1-Butene	vinyloxirane	930-22-3	C=CC1OC1	Alkene	Ether
3,5-Dinitrophenol	3,5-dinitrophenol	586-11-8	Oc1cc(cc(c1)N(=O)=O)N(=O)=O	Nitrogen	Aromatics
3-Bromopropyne	3-bromopropyne	106-96-7	BrCC#C	Alkyne	AlkylHalide
3-Butenenitrile	3-butenenitrile	109-75-1	N#CCC=C	Nitrile	Alkene
3-Chloro-1-Propanol	3-chloro-1-propanol	627-30-5	OCCCCl	Alcohol	AlkylHalide
3-Chloro-2-Methyl Propene	3-chloro-2-methyl-1-propene	563-47-3	ClCC(C)=C	Alkene	AlkylHalide
3-Chlorobenzylchloride	1-chloro-3-(chloromethyl)benzene	620-20-2	ClCc(ccc1)cc1Cl	Aromatics	AlkylHalide
3-Chloropropionitrile	3-chloropropanenitrile	542-76-7	ClCCC#N	Nitrile	AlkylHalide
3-Chloropropyne	3-chloropropyne	624-65-7	ClCC#C	Alkyne	AlkylHalide
3-Heptanol	3-heptanol	589-82-2	CCCCC(O)CC	Alcohol
3-Hydroxy Tetrahydrofuran	tetrahydro-3-furanol	453-20-3	OC1CCOC1	Alcohol	Ether
3-Methoxy Butanol	3-methoxy-1-butanol	2517-43-3	OCCC(C)OC	Alcohol	Ether
3-Methoxy-3-Methyl Butanol	3-methoxy-3-methylbutanol	56539-66-3	OCCC(C)(C)OC	Alcohol	Ether
3-Methoxypropionitrile	3-methoxypropanenitrile	110-67-8	COCCC#N	Nitrile	Ether
3-Methyl Cyclohexanol (Mix)	3-methylcyclohexanol	591-23-1	OC1CC(C)CCC1	Alcohol
3-Methyl Cyclohexanone	3-methylcyclohexanone	591-24-2	CC1CC(CCC1)=O	Ketone
3-Methyl-1,2-Butadiene	3-methyl-1,2-butadiene	598-25-4	CC(C)=C=C	Alkene
3-Methyl-1-Butene	3-methyl-1-butene	563-45-1	CC(C)C=C	Alkene
3-Methyl-2-Butanol	3-methyl-2-butanol	598-75-4	OC(C)C(C)C	Alcohol
3-Nitroaniline	3-aminonitrobenzene	99-09-2	Nc1cc(ccc1)N(=O)=O	Amine	Nitrogen	Aromatics
4,4'-Methylenebis(Phenylisocyanate)	1,1'-methylenebis4-isocyanatobenzene	101-68-8	O=C=Nc(cc1)ccc1Cc2ccc(cc2)N=C=O	Nitrogen	Aromatics
4-(Trifluoromethyl) Acetophenone	1-[4-(trifluoromethyl)phenyl]ethanone	709-63-7	FC(F)(F)c1ccc(C(C)=O)cc1	Ketone	Aromatics	AlkylHalide
4-Aminopyridine	4-pyridinamine	504-24-5	Nc1ccncc1	Amine	Aromatics
4-Bromo-1-Butene	4-bromo-1-butene	5162-44-7	BrCCC=C	Alkene	AlkylHalide
4-Chloro-1,2-Butadiene	4-chloro-1,2-butadiene	25790-55-0	ClCC=C=C	Alkene	AlkylHalide
4-Chloroanisole	4-chloroanisole	623-12-1	COc1ccc(Cl)cc1	Ether	Aromatics
4-Chlorobenzaldehyde	4-chlorobenzaldehyde	104-88-1	Clc1ccc(C=O)cc1	Aldehyde	Aromatics
4-Chlorobenzonitrile	4-chlorobenzonitrile	623-03-0	Clc1ccc(C#N)cc1	Nitrile	Aromatics
4-Chlorobenzyl Alcohol	p-chlorobenzylalcohol	873-76-7	OCc1ccc(Cl)cc1	Alcohol	Aromatics
4-Chlorothiophenol	4-chlorobenzenethiol	106-54-7	Clc1ccc(S)cc1	Sulfide	Aromatics
4-Ethyl Morpholine	n-ethyl-morpholine	100-74-3	CCN1CCOCC1	Amine	Ether
4-Ethyl Phenol	4-ethylphenol	123-07-9	CCc(cc1)ccc1O	Aromatics
4-Ethyl-1,3-Dioxolane-2-One	butylenecarbonate	4437-85-8	CCC1OC(OC1)=O	Ester
4-Fluoro-3-Nitrobenzofluoride	1,4-difluoro-2-nitrobenzene	364-74-9	Fc(ccc1F)cc1N(=O)=O	Nitrogen	Aromatics
4-Hydroxy Benzaldehyde	4-hydroxybenzaldehyde	123-08-0	Oc1ccc(C=O)cc1	Aldehyde	Aromatics
4-Methoxy Acetophenone	4-methoxyacetophenone	100-06-1	COc1ccc(C(C)=O)cc1	Ketone	Ether	Aromatics
4-Methoxy Benzonitrile	4-methoxybenzonitrile	874-90-8	COc1ccc(C#N)cc1	Nitrile	Ether	Aromatics
4-Nitrophenol	4-nitrophenol	100-02-7	Oc1ccc(cc1)N(=O)=O	Nitrogen	Aromatics
4-Pentenal	4-pentenal	2100-17-6	O=CCCC=C	Aldehyde	Alkene
4-Vinyl Pyridine	4-vinylpyridine	100-43-6	C=Cc1ccncc1	Alkene	Aromatics
9,10-Anthraquinone	anthraquinone	84-65-1	O=C3c1ccccc1C(=O)c2ccccc32	Ketone
9,10-Phenanthrenequinone	9,10-phenanthrenedione	84-11-7	O=C3c2ccccc2c1ccccc1C3=O	Ketone
a-Methyl Styrene	alpha-methylstyrene	98-83-9	CC(=C)c1ccccc1	Alkene	Aromatics
Acetaldehyde	acetaldehyde	75-07-0	CC=O	Aldehyde
Acetaldoxime	acetaldehydeoxime	107-29-9	ON=CC	Nitrogen
Acetamide	acetamide	60-35-5	CC(=O)N	Amide
Acetanilide	acetanilide	103-84-4	CC(=O)Nc1ccccc1	Amide	Aromatics
Acetic Acid	aceticacid	64-19-7	OC(C)=O	Carboxylic Acid
Acetic Anhydride	aceticanhydride	108-24-7	CC(OC(C)=O)=O	AcidAnhydride	Ether
Acetone	propanone	67-64-1	CC(C)=O	Ketone
Acetonecyanhydrin	2-hydroxy-2-methylpropanenitrile	75-86-5	OC(C)(C)C#N	Nitrile	Alcohol
Acetonitrile	acetonitrile	75-05-8	CC#N	Nitrile
Acetophenone	acetophenone	98-86-2	CC(=O)c1ccccc1	Ketone	Aromatics
Acetoxime	2-propanoneoxime	127-06-0	ON=C(C)C	Nitrogen
Acetyl Salicylic Acid	aspirin	50-78-2	CC(=O)Oc1ccccc1C(O)=O	Carboxylic Acid	Ester	Aromatics
Acetylacetone	acetylacetone	123-54-6	CC(CC(C)=O)=O	Ketone
Acetylbromide	acetylbromide	506-96-7	CC(Br)=O	Acylhalide
Acetylchloride	acetylchloride	75-36-5	CC(Cl)=O	Acylhalide
Acetylene (Ethyne)	ethine	74-86-2	C#C	Alkyne
Acetylfluoride	acetylfluoride	557-99-3	FC(C)=O	Acylhalide
Acridine	acridine	260-94-6	c(ccc1cc2ccccc2n3)cc31	Aromatics
Acrolein	acrolein	107-02-8	O=CC=C	Aldehyde	Alkene
Acrylamide	2-propenamide	79-06-1	C=CC(=O)N	Amide	Alkene
Acrylic Acid	acrylicacid	79-10-7	OC(=O)C=C	Carboxylic Acid	Alkene
Acrylonitrile	2-propenenitrile	107-13-1	N#CC=C	Nitrile	Alkene
Acrylylchloride	propenoylchloride	814-68-6	ClC(=O)C=C	Acylhalide	Alkene
Adenine	adenine	73-24-5	Nc2c1nc[nH]c1ncn2	Aromatics
Adipic Acid (1,6-Hexanedioic)	hexanedioicacid	124-04-9	OC(CCCCC(O)=O)=O	Carboxylic Acid
Allyl Acetate	aceticacid-2-propenylester	591-87-7	CC(OCC=C)=O	Ester	Alkene
Allyl Acetic Acid	4-pentenoicacid	591-80-0	OC(CCC=C)=O	Carboxylic Acid	Alkene
Allyl Acetoacetate	3-oxobutanoicacid-2-propenylester	1118-84-9	CC(CC(OCC=C)=O)=O	Ester	Ketone	Alkene
Allyl Alcohol	2-propen-1-ol	107-18-6	OCC=C	Alcohol	Alkene
Allyl Amine	2-propen-1-amine	107-11-9	NCC=C	Amine	Alkene
Allyl Bromide (3-Bromoprene)	3-bromopropene	106-95-6	BrCC=C	Alkene	AlkylHalide
Allyl Chloride	3-chloropropene	107-05-1	ClCC=C	Alkene	AlkylHalide
Allyl Cyanide	3-butenenitrile	109-75-1	N#CCC=C	Nitrile	Alkene
Allyl Ethylether	allylethylether	557-31-3	CCOCC=C	Alkene	Ether
Allyl Fluoride	allylfluoride	818-92-8	FCC=C	Alkene	AlkylHalide
Allyl Formate	allylformate	1838-59-1	O=COCC=C	Ester	Alkene
Allyl Isothiocyanate	isothiocyanatopropene	57-06-7	C=CCN=C=S	Alkene	Nitrogen
Allyl Mercaptan	allylthiol	870-23-5	SCC=C	Sulfide	Alkene
Allyl Methacrylate	2-methyl-2-propenoicacid2-propenylester	96-05-9	C=CCOC(=O)C(C)=C	Ester	Alkene
Allyl Methyl Ether	3-methoxy-1-propene	627-40-7	COCC=C	Alkene	Ether
Allylacetonitrile (4-Pentenenitrile)	4-pentenenitrile	592-51-8	N#CCCC=C	Nitrile	Alkene
Alpha,Alpha,A-Trifluoro Toluene	trifluoromethylbenzene	98-08-8	FC(F)(F)c1ccccc1	Aromatics	AlkylHalide
Ammonia	nh3	7664-41-7	N	Amine
Amyl Acetate	n-pentylacetate	628-63-7	CCCCCOC(C)=O	Ester
Anethole (Trans)	1-methoxy-4-(1-propenyl)-benzene	104-46-1	COc1ccc(C=CC)cc1	Alkene	Ether	Aromatics
Aniline	aniline	62-53-3	Nc1ccccc1	Amine	Aromatics
Anisaldehyde (2-Methoxy Benzaldehyde)	2-methoxybenzaldehyde	135-02-4	COc1ccccc1C=O	Aldehyde	Ether	Aromatics
Anisidine (2-Methoxyaniline)	o-anisidine	90-04-0	COc1ccccc1N	Amine	Ether	Aromatics
Anisole	anisole	100-66-3	COc1ccccc1	Ether	Aromatics
Ascorbic Acid	ascorbicacid	50-81-7	OCC(O)C1OC(=O)C(O)=C1O	Ester	Alcohol
Benzal Chloride (Alpha,A-Dichlorobenzene)	(dichloromethyl)-benzene	98-87-3	ClC(Cl)c1ccccc1	Aromatics	AlkylHalide
Benzaldehyde	benzaldehyde	100-52-7	O=Cc1ccccc1	Aldehyde	Aromatics
Benzamide	benzamide	55-21-0	O=C(c1ccccc1)N	Amide	Aromatics
Benzene	benzene	71-43-2	c1ccccc1	Aromatics
Benzimidazole	1h-benzimidazole	51-17-2	c2cc1nc[nH]c1cc2	Aromatics
Benzisoxazole	benzisoxazole	271-58-9	c2cc1nocc1cc2	Aromatics
Benzoic Acid	benzoicacid	65-85-0	OC(=O)c1ccccc1	Carboxylic Acid	Aromatics
Benzoin	benzoin	119-53-9	OC(C(=O)c2ccccc2)c1ccccc1	Ketone	Alcohol	Aromatics
Benzonitrile	benzonitrile	100-47-0	N#Cc1ccccc1	Nitrile	Aromatics
Benzophenone	benzophenone	119-61-9	O=C(c2ccccc2)c1ccccc1	Ketone	Aromatics
Benzothiazole	benzothiazole	95-16-9	c(ccc1sc2)cc1n2	Aromatics
Benzotrichloride	(trichloromethyl)-benzene	98-07-7	ClC(Cl)(Cl)c1ccccc1	Aromatics	AlkylHalide
Benzoyl Chloride	benzoylchloride	98-88-4	ClC(=O)c1ccccc1	Acylhalide	Aromatics
Benzyl Acetate	aceticacidphenylmethylester	140-11-4	CC(OCc1ccccc1)=O	Ester	Aromatics
Benzyl Alcohol	benzylalcohol	100-51-6	OCc1ccccc1	Alcohol	Aromatics
Benzyl Amine	benzylamine	100-46-9	NCc1ccccc1	Amine	Aromatics
Benzyl Benzoate	benzoicacidphenylmethylester	120-51-4	O=C(OCc2ccccc2)c1ccccc1	Ester	Aromatics
Benzyl Butyl Phthalate	butylbenzylphthalate	85-68-7	CCCCOC(=O)c2ccccc2C(OCc1ccccc1)=O	Ester	Aromatics
Benzyl Chloride	(chloromethyl)-benzene	100-44-7	ClCc1ccccc1	Aromatics	AlkylHalide
Benzyl Ethyl Ether	(ethoxymethyl)-benzene	539-30-0	CCOCc1ccccc1	Ether	Aromatics
Bicyclohexyl	bicyclohexyl	92-51-3	C(CC1)CCC1C2CCCCC2	Alkane
Biphenyl	biphenyl	92-52-4	c(cc1)ccc1c2ccccc2	Aromatics
Bis(Chloromethyl)Ether	oxybischloromethane	542-88-1	ClCOCCl	Ether	AlkylHalide
Bisphenol A	4,4'-(1-methylethylidene)bisphenol	80-05-7	CC(C)(c(cc2)ccc2O)c(cc1)ccc1O	Aromatics
Biuret	imidodicarbonicdiamide	108-19-0	O=C(N)NC(=O)N	Ketone
Boron Trichloride	bcl3	10294-34-5	ClB(Cl)Cl
Bromine	br2	7726-95-6	BrBr
Bromobenzene	bromobenzene	108-86-1	Brc1ccccc1	Aromatics
Bromochloromethane	ch2clbr	74-97-5	ClCBr	AlkylHalide
Bromoethylene	bromoethene	593-60-2	BrC=C	Alkene
Bromoform	chbr3	75-25-2	BrC(Br)Br	AlkylHalide
Bromomethyl Methyl Ether	bromomethylmethylether	13057-17-5	COCBr	Ether	AlkylHalide
Bromotrichloro Methane #1	bromotrichloromethane	75-62-7	ClC(Cl)(Cl)Br	AlkylHalide
Bromotrichloro Methane #2-Gc	bromotrichloromethane	75-62-7	ClC(Cl)(Cl)Br	AlkylHalide
Bromotrichloro Methane #3	bromotrichloromethane	75-62-7	ClC(Cl)(Cl)Br	AlkylHalide
Bromotrifluoromethane (Freon 1381)	cf3br	75-63-8	FC(F)(F)Br	AlkylHalide
Butadiene-4-Cyano	2,4-pentadienenitrile	1615-70-9	N#CC=CC=C	Nitrile	Alkene
Butadienedioxide	1,3-butadienediepoxide	1464-53-5	C1OC1C2OC2	Ether
Butadione	butadione	431-03-8	CC(=O)C(C)=O	Ketone
Butane	butane	106-97-8	CCCC	Alkane
Butyl Benzoate	benzoicacidbutylester	136-60-7	CCCCOC(=O)c1ccccc1	Ester	Aromatics
Butyl Formate	butylformate	592-84-7	CCCCOC=O	Ester
Butyl Lactate	butyllactate	138-22-7	CCCCOC(C(O)C)=O	Ester	Alcohol
Butyl Stearate	octadecanoicacidbutylester	123-95-5	CCCCCCCCCCCCCCCCCC(OCCCC)=O	Ester
Butyleneoxide	butoxide	106-88-7	CCC1OC1	Ether
Butyraldehyde	butanal	123-72-8	CCCC=O	Aldehyde
Butyric Acid	butyricacid	107-92-6	CCCC(O)=O	Carboxylic Acid
Butyric Anhydride	butanoicacid,anhydride	106-31-0	CCCC(OC(CCC)=O)=O	AcidAnhydride	Ether
Butyronitrile	butyronitrile	109-74-0	CCCC#N	Nitrile
Butyrylchloride	butyrylchloride	141-75-3	CCCC(Cl)=O	Acylhalide
Caffeine	caffeine	58-08-2	Cn1cnc2c1c(=O)n(C)c(=O)n2C	Amide	Ketone	Aromatics
Camphene	camphene	79-92-5	CC2(C)C1CC(CC1)C2=C	Alkene
Caprolactone (Epsilon)	2-oxepanone	502-44-3	O=C1CCCCCO1	Ester
Carbazole (Diphenylenimine)	carbazole	86-74-8	c(ccc1c2ccccc2[nH]3)cc31	Aromatics
Carbon Dioxide (Fit = 1.0)	co2	124-38-9	O=C=O
Carbon Disulfide (0 Dipole Moment)	cs2	75-15-0	S=C=S
Carbon Disulfide (P By Group Cont.)	cs2	75-15-0	S=C=S
Carbon Tetrachloride (0 Dipole Moment)	ccl4	56-23-5	ClC(Cl)(Cl)Cl	AlkylHalide
Carbon Tetrachloride (P By Group Cont.)	ccl4	56-23-5	ClC(Cl)(Cl)Cl	AlkylHalide
Carbonyl Sulfide	cos	463-58-1	O=C=S
Cetyl Alcohol (1-Hexadecanol)	1-hexadecanol	36653-82-4	OCCCCCCCCCCCCCCCC	Alcohol
Chloral	trichloroacetaldehyde	75-87-6	ClC(Cl)(Cl)C=O	Aldehyde	AlkylHalide
Chlorine	cl2	7782-50-5	ClCl
Chloro Acetaldehyde	chloroacetaldehyde	107-20-0	ClCC=O	Aldehyde	AlkylHalide
Chloro Acetic Acid	chloroaceticacid	79-11-8	ClCC(O)=O	Carboxylic Acid	AlkylHalide
Chloro Maleic Anhydride	3-chloro-2,5-furandione	96-02-6	ClC1=CC(OC1=O)=O	AcidAnhydride	Alkene	Ether
Chloroacetone	chloroacetone	78-95-5	ClCC(C)=O	Ketone	AlkylHalide
Chloroacetonitrile	chloroacetonitrile	107-14-2	ClCC#N	Nitrile	AlkylHalide
Chloroacetylchloride	chloroacetylchloride	79-04-9	ClCC(Cl)=O	Acylhalide	AlkylHalide
Chloroacetylene	chloroethyne	593-63-5	ClC#C	Alkyne
Chlorobenzene	chlorobenzene	108-90-7	Clc1ccccc1	Aromatics
Chlorodifluoromethane (Freon 22)	chf2cl	75-45-6	FC(F)Cl	AlkylHalide
Chloroform	chcl3	67-66-3	ClC(Cl)Cl	AlkylHalide
Chloronitromethane	chloronitromethane	1794-84-9	ClCN(=O)=O	Nitrogen	AlkylHalide
Chloropicrin (Trichloronitromethane)	trichloronitromethane	76-06-2	ClC(Cl)(Cl)N(=O)=O	Nitrogen	AlkylHalide
Chloroprene	2-chloro-1,3-butadiene	126-99-8	ClC(=C)C=C	Alkene
Chlorotrifluoroethylene (Ctfe)	chlorotrifluoroethene	79-38-9	FC(F)=C(F)Cl	Alkene
Cis-Decahydronaphthalene	cis-decalin	493-01-6	C(CCC1CC2)CC1CC2	Alkane
Citraconic Anhydride	methyl-maleic-anhydride	616-02-4	CC1=CC(OC1=O)=O	AcidAnhydride	Alkene	Ether
Coumarin	2h-1-benzopyran-2-one	91-64-5	O=C2C=Cc1ccccc1O2	Ester	Aromatics
Crotonaldehyde	trans-crotonaldehyde	123-73-9	CC=CC=O	Aldehyde	Alkene
Crotonic Acid	trans-crotonic-acid	107-93-7	CC=CC(O)=O	Carboxylic Acid	Alkene
Crotonlactone	2(5h)-furanone	497-23-4	O=C1C=CCO1	Ester	Alkene
Cyanamid (Carbamonitrile)	cyanamide	420-04-2	N#CN	Nitrile
Cyanogen	cyanogen	460-19-5	N#CC#N	Nitrile
Cyanogen Bromide	cyanogenbromide	506-68-3	BrC#N	Nitrile
Cyanogen Chloride	cyanogenchloride	506-77-4	ClC#N	Nitrile
Cyclobutanone	cyclobutanone	1191-95-3	O=C1CCC1	Ketone
Cyclodecanone	cyclodecanone	1502-06-3	O=C1CCCCCCCCC1	Ketone
Cyclododecane	cyclododecane	294-62-2	C1CCCCCCCCCCC1	Alkane
Cycloheptane	cycloheptane	291-64-5	C1CCCCCC1	Alkane
Cycloheptanone	cycloheptanone	502-42-1	O=C1CCCCCC1	Ketone
Cyclohexane	cyclohexane	110-82-7	C1CCCCC1	Alkane
Cyclohexanol	cyclohexanol	108-93-0	OC1CCCCC1	Alcohol
Cyclohexanone	cyclohexanone	108-94-1	O=C1CCCCC1	Ketone
Cyclohexene	cyclohexene	110-83-8	C1CC=CCC1	Alkene
Cyclohexyl Benzene	cyclohexylbenzene	827-52-1	C(CC2)CCC2c1ccccc1	Aromatics
Cyclohexylamine	cyclohexylamine	108-91-8	NC1CCCCC1	Amine
Cyclohexylchloride	chlorocyclohexane	542-18-7	ClC1CCCCC1	AlkylHalide
Cyclooctanone	cyclooctanone	502-49-8	O=C1CCCCCCC1	Ketone
Cyclopentadiene	cyclopentadiene	542-92-7	C1C=CC=C1	Alkene
Cyclopentane	cyclopentane	287-92-3	C1CCCC1	Alkane
Cyclopentanone	cyclopentanone	120-92-3	O=C1CCCC1	Ketone
Cyclopentene	cyclopentene	142-29-0	C1CC=CC1	Alkene
Cyclopentyl Methyl Ether (Cpme)	cyclopentyl-methyl-ether	5614-37-9	COC1CCCC1	Ether
Cyclopropane	cyclopropane	75-19-4	C1CC1	Alkane
Cyclopropylmethylketone	1-cyclopropylethanone	765-43-5	CC(C1CC1)=O	Ketone
Cyclopropylnitrile	cyclopropanecarbonitrile	5500-21-0	N#CC1CC1	Nitrile
DDT	ddt	50-29-3	ClC(Cl)(Cl)C(c(cc2)ccc2Cl)c(cc1)ccc1Cl	Aromatics	AlkylHalide
Decamethylcyclopentasiloxane	decamethylcyclopentasiloxane	541-02-6	C[Si]1(C)O[Si](C)(C)O[Si](C)(C)O[Si](C)(C)O[Si](C)(C)O1	Silicon
Decane	n-decane	124-18-5	CCCCCCCCCC	Alkane
Di p-Tolyl Sulfoxide	bis(4-methylphenyl)sulfoxide	1774-35-2	Cc1ccc(cc1)S(=O)c(cc2)ccc2C	Sulfur	Aromatics
Di-(2-Chloro-Isopropyl) Ether	dcip	108-60-1	ClCC(C)OC(C)CCl	Ether	AlkylHalide
Di-(2-Chloroethoxy) Methane	di-(2-chloroethoxy)methane	111-91-1	ClCCOCOCCCl	Ether	AlkylHalide
Di-(2-Chloroethyl) Ether	bis(2-chloroethyl)ether	111-44-4	ClCCOCCCl	Ether	AlkylHalide
Di-(2-Methoxyethyl) Ether	diglyme	111-96-6	COCCOCCOC	Ether
Di-2-Ethylhexyl Amine	2-ethyl-n-(2-ethylhexyl)-1-hexanamine	106-20-7	CCCCC(CC)CNCC(CC)CCCC	Amine
Di-Isobutyl Carbinol	2,6-dimethyl-4-heptanol	108-82-7	CC(C)CC(O)CC(C)C	Alcohol
Di-Isobutyl Ketone	2,6-dimethyl-4-heptanone	108-83-8	CC(C)CC(CC(C)C)=O	Ketone
Di-Isodecyl Phthalate	diisodecyl-phthalate	26761-40-0	CC(C)CCCCCCCOC(=O)c1ccccc1C(OCCCCCCCC(C)C)=O	Ester	Aromatics
Di-Isononyl Phthalate	1,2-benzenedicarboxylicaciddiisononylester	28553-12-0	CC(C)CCCCCCOC(=O)c1ccccc1C(OCCCCCCC(C)C)=O	Ester	Aromatics
Di-Isopropyl Sulfoxide	diisopropylsulfoxide	2211-89-4	CC(C)S(C(C)C)=O	Sulfur
Di-n-Butyl Ether	di-n-butylether	142-96-1	CCCCOCCCC	Ether
Di-n-Butyl Sulfoxide	1,1'-sulfinylbisbutane	2168-93-6	CCCCS(CCCC)=O	Sulfur
Di-n-Pentyl Ether	di-n-pentylether	693-65-2	CCCCCOCCCCC	Ether
Di-n-Propyl Ether	di-n-propylether	111-43-3	CCCOCCC	Ether
Di-n-Propyl Sulfoxide	1,1'-sulfinylbispropane	4253-91-2	CCCS(CCC)=O	Sulfur
Di-sec-Butyl Ether	2,2'-oxybis-butane	6863-58-7	CCC(C)OC(C)CC	Ether
Diacetone Alcohol	4-oh-4-me-2-pentanone	123-42-2	OC(C)(C)CC(C)=O	Ketone	Alcohol
Diallyl Amine	n-2-propenyl-2-propen-1-amine	124-02-7	C=CCNCC=C	Amine	Alkene
Diallyl Ether	diallylether	557-40-4	C=CCOCC=C	Alkene	Ether
Diazomethane	diazomethane	334-88-3	N#N=C
Dibenzyl Ether	dibenzylether	103-50-4	O(Cc2ccccc2)Cc1ccccc1	Ether	Aromatics
Dibromomethane (Methylene Dibromide)	ch2br2	74-95-3	BrCBr	AlkylHalide
Dibutyl Amine	dibutylamine	111-92-2	CCCCNCCCC	Amine
Dibutyl Ketone	5-nonanone	502-56-7	CCCCC(CCCC)=O	Ketone
Dibutyl Maleate	(z)-2-butenedioicaciddibutylester	105-76-0	CCCCOC(=O)C=CC(OCCCC)=O	Ester	Alkene
Dibutyl Phthalate	dibutylphthalate	84-74-2	CCCCOC(=O)c1ccccc1C(OCCCC)=O	Ester	Aromatics
Dibutyl Sebacate	decanedioicaciddibutylester	109-43-3	CCCCOC(CCCCCCCCC(OCCCC)=O)=O	Ester
Dichloroacetaldehyde	dichloroacetaldehyde	79-02-7	ClC(Cl)C=O	Aldehyde	AlkylHalide
Dichloroacetic Acid	dichloroaceticacid	79-43-6	ClC(Cl)C(O)=O	Carboxylic Acid	AlkylHalide
Dichloroacetonitrile	dichloroacetonitrile	3018-12-0	ClC(Cl)C#N	Nitrile	AlkylHalide
Dichlorodifluoromethane (Freon 12)	dichlorodifluoromethane	75-71-8	FC(F)(Cl)Cl	AlkylHalide
Dichloroethylene (Trans)	trans-1,2-dichloroethene	156-60-5	ClC=CCl	Alkene
Dichloromethyl Methyl Ether	dichloromethylmethylether	4885-02-3	COC(Cl)Cl	Ether	AlkylHalide
Dichloromonofluoromethane (Freon21)	chfcl2	75-43-4	FC(Cl)Cl	AlkylHalide
Diethanolamine	diethanolamine	111-42-2	OCCNCCO	Alcohol	Amine
Diethyl Adipate	adipinsaeurediethylester	141-28-6	CCOC(CCCCC(OCC)=O)=O	Ester
Diethyl Amine	diethylamine	109-89-7	CCNCC	Amine
Diethyl Carbonate	diethylcarbonate	105-58-8	CCOC(OCC)=O	Ester
Diethyl Ether	diethylether	60-29-7	CCOCC	Ether
Diethyl Ketone	3-pentanone	96-22-0	CCC(CC)=O	Ketone
Diethyl Malonate	diethylmalonate	105-53-3	CCOC(CC(OCC)=O)=O	Ester
Diethyl Oxalate	ethyloxalat	95-92-1	CCOC(=O)C(OCC)=O	Ester
Diethyl Phthalate	diethylphthalate	84-66-2	CCOC(=O)c1ccccc1C(OCC)=O	Ester	Aromatics
Diethyl Succinate	ethylsuccinate	123-25-1	CCOC(CCC(OCC)=O)=O	Ester
Diethyl Sulfate	diethylsulfate	64-67-5	CCOS(OCC)(=O)=O	Alkane
Diethyl Sulfide	diethylsulfide	352-93-2	CCSCC	Sulfide	Ether
Diethyldisulfide	diethyldisulfide	110-81-6	CCSSCC	Sulfide
Diethylene Glycol	diethyleneglycol	111-46-6	OCCOCCO	Alcohol	Ether
Diethylene Glycol Butyl Ether Acetate	2-(2-butoxyethoxy)ethanolacetate	124-17-4	CCCCOCCOCCOC(C)=O	Ester	Ether
Diethylene Glycol Dibutyl Ether	diethyleneglycoldibutylether	112-73-2	CCCCOCCOCCOCCCC	Ether
Diethylene Glycol Diethyl Ether	1,1'-oxybis-2-ethoxy-ethane	112-36-7	CCOCCOCCOCC	Ether
Diethylene Glycol Hexyl Ether	2-2-(hexyloxy)ethoxyethanol	112-59-4	OCCOCCOCCCCCC	Alcohol	Ether
Diethylene Glycol Monobutyl Ether	diethyleneglycolmonobutylether	112-34-5	OCCOCCOCCCC	Alcohol	Ether
Diethylene Glycol Monoethyl Ether	diethyleneglycolmonoethylether	111-90-0	OCCOCCOCC	Alcohol	Ether
Diethylene Glycol Monoethyl Ether Acetate	2-(2-ethoxyethoxy)-ethanolacetate	112-15-2	CCOCCOCCOC(C)=O	Ester	Ether
Diethylene Glycol Monomethyl Ether	2-(2-methoxyethoxy)ethanol	111-77-3	COCCOCCO	Alcohol	Ether
Diethylene Glycol Monopropyl Ether	2-(2-propoxyethoxy)ethanol	6881-94-3	OCCOCCOCCC	Alcohol	Ether
Diethylenetriamine	n-(2-aminoethyl)-1,2-ethanediamine	111-40-0	NCCNCCN	Amine
Diethylhexyl Phthalate (Dioctyl Phthalate)	di-2-ethylhexylphthalate	117-81-7	CCCCC(CC)COC(=O)c1ccccc1C(OCC(CC)CCCC)=O	Ester	Aromatics
Dihexyl Ether	di-n-hexylether	112-58-3	CCCCCCOCCCCCC	Ether
Dihexyl Phthalate	dihexylphthalate	84-75-3	CCCCCCOC(=O)c1ccccc1C(OCCCCCC)=O	Ester	Aromatics
Dihydropyran	2,3-dihydropyran	110-87-2	C1OC=CCC1	Ether
Diisobutyl Adipate	rhodiasolv-dib1_cas_141_04_8	141-04-8	CC(C)COC(CCCCC(OCC(C)C)=O)=O	Ester
Diisopropylamine	diisopropylamine	108-18-9	CC(C)NC(C)C	Amine
Diketene	4-methylene-2-oxetanone	674-82-8	O=C1CC(O1)=C	Ester
Dimethoxymethane	dimethoxymethane	109-87-5	COCOC	Ether
Dimethyl Isosorbide	dimethylisosorbide	5306-85-4	COC1COC2C1OCC2OC	Ether
Dimethyl Acetylene	2-butyne	503-17-3	CC#CC	Alkyne
Dimethyl Adipate	dimethyl_adipate	627-93-0	COC(CCCCC(OC)=O)=O	Ester
Dimethyl Amine	dimethylamine	124-40-3	CNC	Amine
Dimethyl Carbonate	dimethylcarbonate	616-38-6	COC(OC)=O	Ester
Dimethyl Cellosolve	1,2-dimethoxyethane	110-71-4	COCCOC	Ether
Dimethyl Disulfide	dimethyldisulfide	624-92-0	CSSC	Sulfide
Dimethyl Ethanolamine	2-(dimethylamino)-ethanol	108-01-0	OCCN(C)C	Alcohol	Amine
Dimethyl Ether	dimethylether	115-10-6	COC	Ether
Dimethyl Formamide (DMF)	dimethylformamide	68-12-2	CN(C)C=O	Amide
Dimethyl Glutarate	pentanedioicaciddimethylester	1119-40-0	COC(CCCC(OC)=O)=O	Ester
Dimethyl Ketene	2-methyl-1-propen-1-one(dimethylketene)	598-26-5	CC(C)=C=O	Ketone
Dimethyl Maleate	dimethylmaleate	624-48-6	COC(=O)C=CC(OC)=O	Ester	Alkene
Dimethyl Phthalate	dimethylphthalate	131-11-3	COC(=O)c1ccccc1C(OC)=O	Ester	Aromatics
Dimethyl Succinate	dimethylsuccinate	106-65-0	COC(CCC(OC)=O)=O	Ester
Dimethyl Sulfate	dimethylsulfate	77-78-1	COS(OC)(=O)=O
Dimethyl Sulfide	dimethylsulfide	75-18-3	CSC	Sulfide	Ether
Dimethyl Sulfone	dimethylsulfone	67-71-0	CS(C)(=O)=O	Sulfur
Dimethyl Sulfoxide (DMSO)	dimethylsulfoxide	67-68-5	CS(C)=O	Sulfur
Dioctyl Adipate	hexanedioicacid-dioctylester	123-79-5	CCCCCCCCOC(CCCCC(OCCCCCCCC)=O)=O	Ester
Dipentene (Dl-Limonene)	dipentene	138-86-3	CC(C1CC=C(C)CC1)=C	Alkene
Diphenyl Acetylene (0 Dipole Moment)	1,1'-(1,2-ethynediyl)bisbenzene	501-65-5	c(cc1)ccc1C#Cc2ccccc2	Alkyne	Aromatics
Diphenyl Acetylene (P By Group Cont.)	1,1'-(1,2-ethynediyl)bisbenzene	501-65-5	c(cc1)ccc1C#Cc2ccccc2	Alkyne	Aromatics
Diphenyl Ether	diphenylether	101-84-8	O(c2ccccc2)c1ccccc1	Ether	Aromatics
Diphenyl Sulfone	diphenylsulfone	127-63-9	O=S(c2ccccc2)(c1ccccc1)=O	Sulfur	Aromatics
Diphenylamine	n-phenyl-benzeneamine	122-39-4	N(c2ccccc2)c1ccccc1	Amine	Aromatics
Diphenylmethane	diphenylmethane	101-81-5	C(c2ccccc2)c1ccccc1	Aromatics
Dipropyl Amine	dipropylamine	142-84-7	CCCNCCC	Amine
Dipropyl Ketone	4-heptanone	123-19-3	CCCC(CCC)=O	Ketone
Dipropylene Glycol Mono n-Butyl Ether	dipropyleneglycoln-butylether	29911-28-2	CCCCOCC(C)OCC(O)C	Alcohol	Ether
Dipropylene Glycol Mono n-Propyl Ether	1-(1-methyl-2-propoxyethoxy)-2-propanol	29911-27-1	CCCOCC(C)OCC(O)C	Alcohol	Ether
Dipropylene Glycol Monomethyl Ether Acetate	dpg-monomethyl-ether-acetate	88917-22-0	COC(C)COC(C)COC(C)=O	Ester	Ether
Divinylsulfide	1,1'-thiobisethene	627-51-0	C=CSC=C	Sulfide	Ether
Dodecane	dodecane	112-40-3	CCCCCCCCCCCC	Alkane
Dodecanol	dodecanol	112-53-8	OCCCCCCCCCCCC	Alcohol
Dopamine	dopamine	51-61-6	NCCc(ccc1O)cc1O	Amine	Aromatics
Eicosane	eicosane	112-95-8	CCCCCCCCCCCCCCCCCCCC	Alkane
Epichlorohydrin	(chloromethyl)-oxirane	106-89-8	ClCC1OC1	Ether	AlkylHalide
Epsilon-Caprolactam	caprolactam	105-60-2	O=C1NCCCCC1	Amide
Ethane	ethane	74-84-0	CC	Alkane
Ethane (Liq. B.P.)	ethane	74-84-0	CC	Alkane
Ethanesulfonylchloride	ethanesulfonylchloride	594-44-5	CCS(Cl)(=O)=O	Sulfur
Ethanethiol (Ethyl Mercaptan)	ethanethiol	75-08-1	CCS	Sulfide
Ethanol	ethanol	64-17-5	OCC	Alcohol
Ethanolamine	ethanolamine	141-43-5	OCCN	Alcohol	Amine
Ethyl Acetate	ethylacetate	141-78-6	CCOC(C)=O	Ester
Ethyl Aceto Acetate (Keto)	ethylacetoacetate	141-97-9	CCOC(CC(C)=O)=O	Ester	Ketone
Ethyl Acetylene	butyne	107-00-6	CCC#C	Alkyne
Ethyl Acrylate	2-propenoicacidethylester	140-88-5	CCOC(=O)C=C	Ester	Alkene
Ethyl Amine	ethylamine	75-04-7	NCC	Amine
Ethyl Amyl Ketone	3-octanone	106-68-3	CCCCCC(CC)=O	Ketone
Ethyl Benzene	ethylbenzene	100-41-4	CCc1ccccc1	Aromatics
Ethyl Benzoate	ethylbenzoate	93-89-0	CCOC(=O)c1ccccc1	Ester	Aromatics
Ethyl Bromide	bromoethane	74-96-4	CCBr	AlkylHalide
Ethyl Butyl Ether	1-ethoxybutane	628-81-9	CCOCCCC	Ether
Ethyl Butyl Ketone	3-heptanone	106-35-4	CCCCC(CC)=O	Ketone
Ethyl Butyrate	ethylbutyrate	105-54-4	CCOC(CCC)=O	Ester
Ethyl Capronate	ethylhexanoate	123-66-0	CCCCCC(OCC)=O	Ester
Ethyl Carbamate	urethane	51-79-6	CCOC(=O)N	Ether
Ethyl Chloride	chloroethane	75-00-3	CCCl	AlkylHalide
Ethyl Chloroformate	carbonochloridicacidethylester	541-41-3	CCOC(Cl)=O	Ether
Ethyl Cyanoacetate	cyanoaceticacidethylester	105-56-6	CCOC(CC#N)=O	Ester	Nitrile
Ethyl Ethynylether	ethoxyacetylene	927-80-0	CCOC#C	Alkyne	Ether
Ethyl Fluoride	fluoroethane	353-36-6	FCC	AlkylHalide
Ethyl Formate	ethylformate	109-94-4	CCOC=O	Ester
Ethyl Iodide	iodoethane	75-03-6	CCI	AlkylHalide
Ethyl Isocyanate	ethylisocyanate	109-90-0	CCN=C=O	Nitrogen
Ethyl Isothiocyanate	ethylisothiocyanate	542-85-8	CCN=C=S	Nitrogen
Ethyl Lactate	2-hydroxypropanoicacidethylester	97-64-3	CCOC(C(O)C)=O	Ester	Alcohol
Ethyl Methacrylate	ethylmethacrylate	97-63-2	CCOC(=O)C(C)=C	Ester	Alkene
Ethyl Methyl Sulfide	(methylthio)-ethane	624-89-5	CCSC	Sulfide	Ether
Ethyl Oleate	ethyl-oleate	111-62-6	CCCCCCCCC=CCCCCCCCC(OCC)=O	Ester	Alkene
Ethyl Propionate	ethylpropionate	105-37-3	CCOC(CC)=O	Ester
Ethyl Thiocyanate	ethylthiocyanate	542-90-5	CCSC#N	Nitrile	Sulfide	Nitrogen
Ethyl Vinylether	ethoxy-ethene	109-92-2	CCOC=C	Ether
Ethyl Vinylketone	1-penten-3-one	1629-58-9	CCC(=O)C=C	Ketone	Alkene
Ethylene	ethene	74-85-1	C=C	Alkene
Ethylene Carbonate	1,3-dioxolan-2-one	96-49-1	O=C1OCCO1	Ester
Ethylene Chlorohydrin	2-chloroethanol	107-07-3	OCCCl	Alcohol	AlkylHalide
Ethylene Cyanohydrin	ethylenecyanohydrin	109-78-4	OCCC#N	Nitrile	Alcohol
Ethylene Dibromide	1,2-dibromoethane	106-93-4	BrCCBr	AlkylHalide
Ethylene Dichloride	1,2-dichloroethane	107-06-2	ClCCCl	AlkylHalide
Ethylene Dinitrate	1,2-ethanedioldinitrate	628-96-6	O=N(OCCON(=O)=O)=O	Nitrogen
Ethylene Glycol	glycol	107-21-1	OCCO	Alcohol
Ethylene Glycol Butyl Ether Acetate	2-butoxyethanolacetate	112-07-2	CCCCOCCOC(C)=O	Ester	Ether
Ethylene Glycol Diacetate	1,2-ethanedioldiacetate	111-55-7	CC(OCCOC(C)=O)=O	Ester
Ethylene Glycol Dibutyl Ether	1,2-dibutoxyethane	112-48-1	CCCCOCCOCCCC	Ether
Ethylene Glycol Diethyl Ether	3,6-dioxaoctane	629-14-1	CCOCCOCC	Ether
Ethylene Glycol Dimethyl Ether	1,2-dimethoxyethane	110-71-4	COCCOC	Ether
Ethylene Glycol Mono 2-Ethyl Hexyl Ether	2-(2-ethylhexyl)oxyethanol	1559-35-9	OCCOCC(CC)CCCC	Alcohol	Ether
Ethylene Glycol Mono Benzyl Ether	ethylenglycolmonobenzylether	622-08-2	OCCOCc1ccccc1	Alcohol	Ether	Aromatics
Ethylene Glycol Mono Ethyl Ether Acrylate	2-ethoxyethylacrylate	106-74-1	CCOCCOC(=O)C=C	Ester	Alkene	Ether
Ethylene Glycol Mono n-Hexyl Ether	2-hexyloxyethanol	112-25-4	OCCOCCCCCC	Alcohol	Ether
Ethylene Glycol Mono n-Propyl Ether	2-propoxyethanol	2807-30-9	OCCOCCC	Alcohol	Ether
Ethylene Glycol Mono t-Butyl Ether	ethyleneglycoltert-butylether	7580-85-0	OCCOC(C)(C)C	Alcohol	Ether
Ethylene Glycol Monobutyl Ether	2-butoxyethanol	111-76-2	OCCOCCCC	Alcohol	Ether
Ethylene Glycol Monoethyl Ether	ethoxyethanol	110-80-5	OCCOCC	Alcohol	Ether
Ethylene Glycol Monoethyl Ether Acetate	2-ethoxyethanolacetate	111-15-9	CCOCCOC(C)=O	Ester	Ether
Ethylene Glycol Monoisopropyl Ether	2-isopropoxyethanol	109-59-1	OCCOC(C)C	Alcohol	Ether
Ethylene Glycol Monomethyl Ether	2-methoxyethanol	109-86-4	COCCO	Alcohol	Ether
Ethylene Glycol Monomethyl Ether Acetate	ethyleneglycolmonomethyletheracetate	110-49-6	COCCOC(C)=O	Ester	Ether
Ethylene Glycol Sulfite	ethylenesulfite	3741-38-6	O=S1OCCO1
Ethylene Oxide	ethyleneoxide	75-21-8	C1OC1	Ether
Ethylene Sulfide	thiirane	420-12-2	S1CC1	Sulfide	Ether
Ethylenediamine	1,2-diaminoethane	107-15-3	NCCN	Amine
Ethyleneimine	aziridine	151-56-4	C1NC1	Amine
Eugenol	eugenol	97-53-0	COc1cc(CC=C)ccc1O	Alkene	Ether	Aromatics
Ferulic Acid	ferulic_acid	1135-24-6	COc1cc(ccc1O)C=CC(O)=O	Carboxylic Acid	Alkene	Ether	Aromatics
Fluorene	fluorene	86-73-7	C(c2cc3)c1ccccc1c2cc3	Alkane
Fluorobenzene	fluorobenzene	462-06-6	Fc1ccccc1	Aromatics
Fluoroethylene	fluoroethene	75-02-5	FC=C	Alkene
Fluoromethane	ch3f	593-53-3	FC	AlkylHalide
Fluoroprene	2-fluoro-1,3-butadiene	381-61-3	FC(=C)C=C	Alkene
Formaldehyde	formaldehyde	50-00-0	O=C	Aldehyde
Formamide	formamide	75-12-7	O=CN	Amide
Formic Acid	formicacid	64-18-6	OC=O	Carboxylic Acid
Formyl Fluoride	formylfluoride	1493-02-3	FC=O	Acylhalide
Fumaronitrile	(e)-2-butenedinitrile	764-42-1	N#CC=CC#N	Nitrile	Alkene
Furan	furane	110-00-9	c1cocc1	Aromatics
Furfural	furfural	98-01-1	O=Cc1occc1	Aldehyde	Aromatics
Furfuryl Alcohol	2-furanmethanol	98-00-0	OCc1occc1	Alcohol	Aromatics
Glycerol	glycerol	56-81-5	OCC(O)CO	Alcohol
Glycerol Carbonate	4-hydroxymethyl-1,3-dioxolan-2-one	931-40-8	OCC1OC(OC1)=O	Ester	Alcohol
Glycerol Triacetate	glycerol-triacetate	102-76-1	CC(OCC(COC(C)=O)OC(C)=O)=O	Ester
Glycerol Tributyrate	glycerol-tributyrate	60-01-5	CCCC(OCC(COC(CCC)=O)OC(CCC)=O)=O	Ester
Glycerol Trioleate	triolein	122-32-7	CCCCCCCCC=CCCCCCCCC(OC(COC(CCCCCCCC=CCCCCCCCC)=O)COC(CCCCCCCC=CCCCCCCCC)=O)=O	Ester	Alkene
Glycidol	oxiranemethanol	556-52-5	OCC1OC1	Alcohol	Ether
Glycidyl Methacrylate	glycidylmethacrylate	106-91-2	CC(=C)C(OCC1OC1)=O	Ester	Alkene	Ether
Glyoxal (Ethandial)	ethanedial	107-22-2	O=CC=O	Aldehyde
HCFC 134a	1,1,1,2-tetrafluoroethane	811-97-2	FCC(F)(F)F	AlkylHalide
HCFC 141b	1,1-dichloro-1-fluoroethane	1717-00-6	FC(C)(Cl)Cl	AlkylHalide
HCFC 225ca	1,1-dichloro-2,2,3,3,3-pentafluoropropane	422-56-0	ClC(Cl)C(F)(F)C(F)(F)F	AlkylHalide
HCFC 225cb	1,3-dichloro-1,1,2,2,3-pentafluoropropane	507-55-1	FC(Cl)C(F)(F)C(F)(F)Cl	AlkylHalide
HCFC 253eb	3-chloro-1,1,1-trifluoropropane	460-35-5	ClCCC(F)(F)F	AlkylHalide
HCFC123	1,1-dichloro-2,2,2-trifluoroethane	306-83-2	ClC(Cl)C(F)(F)F	AlkylHalide
Heptane	n-heptane	142-82-5	CCCCCCC	Alkane
Hexachlorobenzene	hexachlorobenzene	118-74-1	Clc1c(Cl)c(Cl)c(Cl)c(Cl)c1Cl	Aromatics
Hexachloroethane	hexachloroethane	67-72-1	ClC(Cl)(Cl)C(Cl)(Cl)Cl	AlkylHalide
Hexadecane	n-hexadecane	544-76-3	CCCCCCCCCCCCCCCC	Alkane
Hexafluoro Isopropanol	hexafluoro-i-propanol	920-66-1	FC(F)(F)C(O)C(F)(F)F	Alcohol	AlkylHalide
Hexafluoro-1,3-Butadiene	hexafluoro-1,3-butadiene	685-63-2	FC(F)=C(F)C(F)=C(F)F	Alkene
Hexafluorobenzene	hexafluorobenzene	392-56-3	Fc1c(F)c(F)c(F)c(F)c1F	Aromatics
Hexamethyl Benzene	hexamethylbenzene	87-85-4	Cc1c(C)c(C)c(C)c(C)c1C	Aromatics
Hexamethylenetetramine	methenamine	100-97-0	C1N2CN(CN3C2)CN1C3
Hexamethylphosphoramide	hexamethylphosphoramide	680-31-9	CN(C)P(=O)(N(C)C)N(C)C	Phosphorus
Hexanal	hexanal	66-25-1	CCCCCC=O	Aldehyde
Hexane	hexane	110-54-3	CCCCCC	Alkane
Hexane 1,6 Diol	1,6-hexanediol	629-11-8	OCCCCCCO	Alcohol
Hexanoic Acid	n-hexanoicacid	142-62-1	CCCCCC(O)=O	Carboxylic Acid
Hexyl Acetate	n-hexylacetate	142-92-7	CCCCCCOC(C)=O	Ester
HFC 245fa	1,1,1,3,3-pentafluoropropane	460-73-1	FC(F)CC(F)(F)F	AlkylHalide
HFC 338pcc	1,1,2,2,3,3,4,4-octafluorobutane	377-36-6	FC(F)C(F)(F)C(F)(F)C(F)F	AlkylHalide
HFC-365mfc	1,1,1,3,3-pentafluorobutane	406-58-6	FC(F)(F)CC(F)(F)C	AlkylHalide
HFC-43-10mee	1,1,1,2,2,3,4,5,5,5-decafluoropentane	138495-42-8	FC(F)(F)C(F)C(F)C(F)(F)C(F)(F)F	AlkylHalide
HFE 7000	heptafluoro-1-methoxypropane	375-03-1	COC(F)(F)C(F)(F)C(F)(F)F	Ether	AlkylHalide
HFE 7100	1,1,1,2,2,3,3,4,4-nonafluoro-5-oxahexane	163702-07-6	COC(F)(F)C(F)(F)C(F)(F)C(F)(F)F	Ether	AlkylHalide
Hydrazine	hydrazine	302-01-2	NN	Amine
Hydrogen Cyanide	hcn	74-90-8	C#N	Nitrile
Hydrogen Peroxide	h2o2	7722-84-1	OO	Ether
Hydrogen Sulfide	h2s	7783-06-4	S	Sulfide
Hydroxyethyl Acrylate	2-propenoicacid-2-hydroxyethylester	818-61-1	OCCOC(=O)C=C	Ester	Alcohol	Alkene
Indene	1h-indene	95-13-6	C(C=Cc1cc2)c1cc2	Alkene
Indole	indole	120-72-9	c2cc1cc[nH]c1cc2	Aromatics
Iodobenzene	iodobenzene	591-50-4	Ic1ccccc1	Aromatics
Iodoform	triiodomethane	75-47-8	IC(I)I	AlkylHalide
Isoamyl Acetate	isoamylacetate	123-92-2	CC(C)CCOC(C)=O	Ester
Isoamyl Alcohol (3-Methyl-1-Butanol)	isopentanol	123-51-3	OCCC(C)C	Alcohol
Isoamyl Propionate	1-butanol-3-methylpropanoate	105-68-0	CC(C)CCOC(CC)=O	Ester
Isobutyl Acetate	aceticacid-2-methylpropylester	110-19-0	CC(C)COC(C)=O	Ester
Isobutyl Acrylate	2-propenoicacid-2-methylpropylester	106-63-8	CC(C)COC(=O)C=C	Ester	Alkene
Isobutyl Alcohol	isobutanol	78-83-1	OCC(C)C	Alcohol
Isobutyl Formate	isobutylformate	542-55-2	CC(C)COC=O	Ester
Isobutyl Isobutyrate	isobutylisobutyrate	97-85-8	CC(C)COC(C(C)C)=O	Ester
Isobutylene	isobutene	115-11-7	CC(C)=C	Alkene
Isobutyleneoxide	2,2-dimethyl-oxirane	558-30-5	CC1(C)OC1	Ether
Isobutyric Acid	isobutyricacid	79-31-2	CC(C)C(O)=O	Carboxylic Acid
Isocyanic Acid	isocyanicacid	75-13-8	O=C=N	Nitrogen
Isooctyl Alcohol	isooctanol	26952-21-6	OCCCCCC(C)C	Alcohol
Isopentane	methylbutane	78-78-4	CCC(C)C	Alkane
Isophorone	isophorone	78-59-1	CC1(C)CC(=O)C=C(C)C1	Ketone	Alkene
Isoprene (2-Methyl-1,3-Butadiene)	isoprene	78-79-5	CC(=C)C=C	Alkene
Isopropyl Acetate	isopropylacetate	108-21-4	CC(C)OC(C)=O	Ester
Isopropyl Amine (2-Propan Amine)	isopropylamine	75-31-0	NC(C)C	Amine
Isopropyl Benzene (Cumene)	isopropylbenzene	98-82-8	CC(C)c1ccccc1	Aromatics
Isopropyl Chloride (2-Chloro Propane)	2-chloropropane	75-29-6	CC(C)Cl	AlkylHalide
Isopropyl Ether	diisopropylether	108-20-3	CC(C)OC(C)C	Ether
Isopropyl Palmitate	hexadecanoicacidisopropylester	142-91-6	CCCCCCCCCCCCCCCC(OC(C)C)=O	Ester
Isovaleraldehyde	3-methylbutanal	590-86-3	CC(C)CC=O	Aldehyde
Isovaleric Acid	isovalericacid	503-74-2	CC(C)CC(O)=O	Carboxylic Acid
Isoxazole	iso-oxazole	288-14-2	c1nocc1	Aromatics
Ketene	ethenone	463-51-4	O=C=C	Ketone
l-Tyrosine	tyrosine	60-18-4	[NH3+]C(Cc(cc1)ccc1O)C([O-])=O	Carboxylic Acid	Amine	Aromatics
Lactic Acid (dl)	lacticacid	50-21-5	OC(C)C(O)=O	Carboxylic Acid	Alcohol
m-Chloroaniline	3-chlorobenzeneamine	108-42-9	Nc1cc(Cl)ccc1	Amine	Aromatics
m-Cresol	3-hydroxytoluene	108-39-4	Oc1cc(C)ccc1	Aromatics
m-Dichlorobenzene	1,3-dichlorobenzene	541-73-1	Clc1cc(Cl)ccc1	Aromatics
Maleic Anhydride	maleicanhydride	108-31-6	O=C1C=CC(O1)=O	AcidAnhydride	Alkene	Ether
Malononitrile	dicyanomethane	109-77-3	N#CCC#N	Nitrile
Menthofuran	4,5,6,7-tetrahydro-3,6-dimethylbenzofuran	494-90-6	CC2Cc1c(CC2)occ1C	Aromatics
Mesityl Oxide	4-methyl-3-penten-2-one	141-79-7	CC(C)=CC(C)=O	Ketone	Alkene
Mesitylene	1,3,5-trimethylbenzene	108-67-8	Cc1cc(C)cc(C)c1	Aromatics
Methacrylaldehyde	alpha-methylacrolein	78-85-3	CC(=C)C=O	Aldehyde	Alkene
Methacrylamide	2-methyl-2-propenamide	79-39-0	CC(=C)C(=O)N	Amide	Alkene
Methacrylic Acid	methacrylicacid	79-41-4	OC(=O)C(C)=C	Carboxylic Acid	Alkene
Methacrylonitrile	2-methyl-2-propenenitrile	126-98-7	CC(=C)C#N	Nitrile	Alkene
Methane (Liquid B.P.)	methane	74-82-8	C
Methanol	methanol	67-56-1	CO	Alcohol
Methanol Cluster	methanol	67-56-1	CO	Alcohol
Methoxyhexanone (Pentoxone)	4-methoxy-4-methyl-pentan-2-one	107-70-0	COC(C)(C)CC(C)=O	Ketone	Ether
Methyl Acetate	methylacetate	79-20-9	COC(C)=O	Ester
Methyl Aceto Acetate	methylacetoacetate	105-45-3	COC(CC(C)=O)=O	Ester	Ketone
Methyl Acetylene	propyne	74-99-7	CC#C	Alkyne
Methyl Acrylate	methylacrylate	96-33-3	COC(=O)C=C	Ester	Alkene
Methyl Amine	methylamine	74-89-5	CN	Amine
Methyl Amyl Acetate	4-methyl-2-pentylacetate	108-84-9	CC(C)CC(C)OC(C)=O	Ester
Methyl Benzoate	methylbenzoate	93-58-3	COC(=O)c1ccccc1	Ester	Aromatics
Methyl Bromide	ch3br	74-83-9	CBr	AlkylHalide
Methyl Butyl Ketone	2-hexanone	591-78-6	CCCCC(C)=O	Ketone
Methyl Chloride	ch3cl	74-87-3	ClC	AlkylHalide
Methyl Chloroformate	carbonochloridicacidmethylester	79-22-1	COC(Cl)=O	Ether
Methyl Cyanoacetate	cyanoaceticacidmethylester	105-34-0	COC(CC#N)=O	Ester	Nitrile
Methyl Cyclohexane	methylcyclohexane	108-87-2	CC1CCCCC1	Alkane
Methyl Cyclopentane	methylcyclopentane	96-37-7	CC1CCCC1	Alkane
Methyl Ethyl Ether	methylethylether	540-67-0	COCC	Ether
Methyl Ethyl Ketone (MEK)	butanone	78-93-3	CCC(C)=O	Ketone
Methyl Ethyl Ketoxime	2-butanoneoxime	96-29-7	CCC(C)=NO	Nitrogen
Methyl Formate	methylformate	107-31-3	COC=O	Ester
Methyl Furoate	methyl2-furancarboxylate	611-13-2	COC(=O)c1occc1	Ester	Ether	Aromatics
Methyl Glyoxal	methylglyoxal	78-98-8	CC(=O)C=O	Aldehyde	Ketone
Methyl Hydrazine	methylhydrazine	60-34-4	CNN	Amine
Methyl Hydroperoxide	methylhydroperoxide	3031-73-0	OOC	Ether
Methyl Iodide	ch3i	74-88-4	CI	AlkylHalide
Methyl Isoamyl Ketone	5-methyl-2-hexanone	110-12-3	CC(C)CCC(C)=O	Ketone
Methyl Isobutyl Carbinol	4-methyl-2-pentanol	108-11-2	OC(C)CC(C)C	Alcohol
Methyl Isobutyl Ketone (MIBK)	4-methyl-2-pentanone	108-10-1	CC(C)CC(C)=O	Ketone
Methyl Isocyanate	isocyanatomethane	624-83-9	CN=C=O	Nitrogen
Methyl Isopropenyl Ketone	3-methyl-3-buten-2-one	814-78-8	CC(=O)C(C)=C	Ketone	Alkene
Methyl Isothiocyanate	methylisothiocyanate	556-61-6	CN=C=S	Nitrogen
Methyl Mercaptan	methanethiol	74-93-1	SC	Sulfide
Methyl Methacrylate	methylmethacrylate	80-62-6	COC(=O)C(C)=C	Ester	Alkene
Methyl n-Amyl Ketone	2-heptanone	110-43-0	CCCCCC(C)=O	Ketone
Methyl n-Propyl Ketone	2-pentanone	107-87-9	CCCC(C)=O	Ketone
Methyl Nitrate	methylnitrate	598-58-3	CON(=O)=O	Nitrogen
Methyl Oleate	methyloleate	112-62-9	CCCCCCCCC=CCCCCCCCC(OC)=O	Ester	Alkene
Methyl Phenyl Sulfide	methylthiobenzene	100-68-5	CSc1ccccc1	Sulfide	Ether	Aromatics
Methyl Phenyl Sulfone (Uncertain)	methylphenylsulfone	3112-85-4	CS(c1ccccc1)(=O)=O	Sulfur	Aromatics
Methyl Propionate	methylpropionate	554-12-1	COC(CC)=O	Ester
Methyl Salicylate	2-hydroxy-benzoicacidmethylester	119-36-8	COC(=O)c1ccccc1O	Ester	Aromatics
Methyl Silane	methylsilane	992-94-9	[SiH3]C	Silicon
Methyl Sulfolane	3-methyl-tetrahydrothiophene-1,1-dioxide	872-93-5	CC(CC1)CS1(=O)=O	Sulfur
Methyl Thiocyanate	methylthiocyanate	556-64-9	CSC#N	Nitrile	Sulfide	Nitrogen
Methyl Vinyl Ether	methylvinylether	107-25-5	COC=C	Ether
Methyl Vinyl Ketone	1-buten-3-one	78-94-4	CC(=O)C=C	Ketone	Alkene
Methyl-p-Toluate	4-methyl-benzoicacidmethylester	99-75-2	COC(=O)c(cc1)ccc1C	Ester	Aromatics
Methyl-t-Butyl Ether	methyl-t-butylether	1634-04-4	COC(C)(C)C	Ether
Methylal (Dimethoxy Methane)	dimethoxymethane	109-87-5	COCOC	Ether
Methylene Dichloride (Dichloromethane)	ch2cl2	75-09-2	ClCCl	AlkylHalide
Methylene Diiodide (Diiodomethane)	diiodomethane	75-11-6	ICI	AlkylHalide
Morpholine	morpholine	110-91-8	O1CCNCC1	Amine	Ether
N,N,N,N-Tetramethylthiourea	tetramethylthiourea	2782-91-4	CN(C)C(=S)N(C)C
N,N-Dibutyl Formamide	n,n-dibutylformamide	761-65-9	CCCCN(CCCC)C=O	Amide
N,N-Dichloroethyl Amine	2-chloro-n-(2-chloroethyl)ethanamine	334-22-5	ClCCNCCCl	Amine	AlkylHalide
N,N-Diethyl Acetamide	diethylacetamide	685-91-6	CCN(CC)C(C)=O	Amide
N,N-Diethyl Formamide	n,n-diethylformamide	617-84-5	CCN(CC)C=O	Amide
N,N-Dimethyl Acetamide	n,n-dimethylacetamide	127-19-5	CN(C)C(C)=O	Amide
N,N-Dimethyl Butyramide	n,n-dimethylbutanamide	760-79-2	CCCC(=O)N(C)C	Amide
N-(2-Hydroxyethyl)-2-Pyrrolidone	1-(2-hydroxyethyl)-2-pyrrolidinone	3445-11-2	OCCN1CCCC1=O	Amide	Alcohol
N-Acetyl Piperidine	1-acetylpiperidine	618-42-8	CC(=O)N1CCCCC1	Amide
N-Acetylmorpholine	4-acetylmorpholine	1696-20-4	CC(=O)N1CCOCC1	Amide	Ether
n-Butyl Acetate	n-butylacetate	123-86-4	CCCCOC(C)=O	Ester
n-Butyl Aceto Acetate	3-oxobutanoicacidbutylester	591-60-6	CCCCOC(CC(C)=O)=O	Ester	Ketone
n-Butyl Acrylate	2-propenoicacidbutylester	141-32-2	CCCCOC(=O)C=C	Ester	Alkene
n-Butyl Amine	1-butylamine	109-73-9	NCCCC	Amine
n-Butyl Butyrate	butylbutyrate	109-21-7	CCCCOC(CCC)=O	Ester
n-Butyl Cyclohexane	butylcyclohexane	1678-93-9	CCCCC1CCCCC1	Alkane
n-Butyl Cyclopentane	butylcyclopentane	2040-95-1	CCCCC1CCCC1	Alkane
n-Butyl Methacrylate	2-methyl-2-propenoicacidbutylester	97-88-1	CCCCOC(=O)C(C)=C	Ester	Alkene
n-Butyl Propionate	n-butylpropionate	590-01-2	CCCCOC(CC)=O	Ester
n-Butylbenzene	butylbenzene	104-51-8	CCCCc1ccccc1	Aromatics
n-Butyramide	butanamide	541-35-5	CCCC(=O)N	Amide
N-Ethyl Formamide	n-formylethylamine	627-45-2	CCNC=O	Amide
N-Ethyl-2-Pyrrolidone	n-ethyl-2-pyrrolidinone	2687-91-4	CCN1CCCC1=O	Amide
N-Formyl Piperidine	1-piperidinecarboxaldehyde	2591-86-8	O=CN1CCCCC1	Amide
n-Heptyl Acetate	aceticacidheptylester	112-06-1	CCCCCCCOC(C)=O	Ester
N-Methyl Acetamide	n-methylacetamide	79-16-3	CNC(C)=O	Amide
N-Methyl Formamide	methylformamide	123-39-7	CNC=O	Amide
N-Methyl Pyrrolidine	1-methyl-pyrrolidine	120-94-5	CN1CCCC1	Amine
N-Methyl-2-Pyrrolidone (NMP)	n-methyl-2-pyrrolidinone	872-50-4	CN1CCCC1=O	Amide
N-Methylaniline	n-methylaniline	100-61-8	CNc1ccccc1	Amine	Aromatics
N-n-Butyl Pyrrolidone	n-butyl-2-pyrrolidinone	3470-98-2	CCCCN1CCCC1=O	Amide
n-Pentyl Propionate	amylpropionate	624-54-4	CCCCCOC(CC)=O	Ester
n-Propyl Acetate	n-propylacetate	109-60-4	CCCOC(C)=O	Ester
n-Propyl Nitrate	propylnitrate	627-13-4	CCCON(=O)=O	Nitrogen
n-Propyl Propanoate	propylpropionate	106-36-5	CCCOC(CC)=O	Ester
n-Tetradecane	tetradecane	629-59-4	CCCCCCCCCCCCCC	Alkane
Naphthalene	naphthalene	91-20-3	c(ccc1cc2)cc1cc2	Aromatics
Nicotine	nicotine	54-11-5	CN1CCCC1c2cccnc2	Amine	Aromatics
Nitric Acid	nitricacid	7697-37-2	ON(=O)=O	Nitrogen
Nitrobenzene	nitrobenzene	98-95-3	O=N(c1ccccc1)=O	Nitrogen	Aromatics
Nitroethane	nitroethane	79-24-3	CCN(=O)=O	Nitrogen
Nitroethylene	nitroethene	3638-64-0	C=CN(=O)=O	Nitrogen
Nitroglycerin (Glyceryl Trinitrate)	1,2,3-propanetrioltrinitrate	55-63-0	O=N(OCC(CON(=O)=O)ON(=O)=O)=O	Nitrogen
Nitromethane	nitromethane	75-52-5	CN(=O)=O	Nitrogen
Nitrosobenzene	nitrosobenzene	586-96-9	O=Nc1ccccc1	Aromatics
Nonane	n-nonane	111-84-2	CCCCCCCCC	Alkane
Norephedrin	ephedrine	299-42-3	CNC(C)C(O)c1ccccc1	Alcohol	Amine	Aromatics
o-Chlorofluorobenzene	o-chlorofluorobenzene	348-51-6	Fc1ccccc1Cl	Aromatics
o-Chlorostyrene	o-chlorostyrene	2039-87-4	Clc1ccccc1C=C	Alkene	Aromatics
o-Chlorotoluene	1-chloro-2-methylbenzene	95-49-8	Cc1ccccc1Cl	Aromatics
o-Dichlorobenzene	1,2-dichlorobenzene	95-50-1	Clc1ccccc1Cl	Aromatics
o-Difluorobenzene	o-difluorobenzene	367-11-3	Fc1ccccc1F	Aromatics
o-Methoxyphenol (Guaiacol)	2-methoxyphenol	90-05-1	COc1ccccc1O	Ether	Aromatics
Octadecane	octadecane	593-45-3	CCCCCCCCCCCCCCCCCC	Alkane
Octamethylcyclotetrasiloxane	octamethylcyclotetrasiloxane	556-67-2	C[Si]1(C)O[Si](C)(C)O[Si](C)(C)O[Si](C)(C)O1	Silicon
Octane	octane	111-65-9	CCCCCCCC	Alkane
Octanoic Acid	caprylicacid	124-07-2	CCCCCCCC(O)=O	Carboxylic Acid
Octyl Acetate	aceticacidoctylester	112-14-1	CCCCCCCCOC(C)=O	Ester
Oleic Acid	cis-9-octadecenoicacid	112-80-1	CCCCCCCCC=CCCCCCCCC(O)=O	Carboxylic Acid	Alkene
Oleyl Alcohol	oleyl-alcohol	143-28-2	OCCCCCCCCC=CCCCCCCCC	Alcohol	Alkene
OS-10 (Hexamethyldisiloxane)	hexamethyldisiloxane	107-46-0	C[Si](C)(C)O[Si](C)(C)C	Silicon
OS-20 (Octamethyltrisiloxane)	octamethyltrisiloxane	107-51-7	C[Si](C)(C)O[Si](C)(C)O[Si](C)(C)C	Silicon
OS-30 (Decamethyltetrasiloxane)	decamethyltetrasiloxane	141-62-8	C[Si](C)(C)O[Si](C)(C)O[Si](C)(C)O[Si](C)(C)C	Silicon
Oxalic Acid	oxalicacid	144-62-7	OC(=O)C(O)=O	Carboxylic Acid
Oxalylchloride	oxalylchloride	79-37-8	ClC(=O)C(Cl)=O	Acylhalide
Oxetane (Trimethylene Oxide)	oxetane	503-30-0	O1CCC1	Ether
Ozone	o3	10028-15-6	[O-][O+]=O
p-Anisidine (Methoxy Aniline)	p-anisidine	104-94-9	COc(cc1)ccc1N	Amine	Ether	Aromatics
p-Bromobenzonitrile	4-bromobenzonitrile	623-00-7	Brc(cc1)ccc1C#N	Nitrile	Aromatics
p-Bromonitrobenzene	4-bromonitrobenzene	586-78-7	Brc1ccc(cc1)N(=O)=O	Nitrogen	Aromatics
p-Bromotoluene	1-bromo-4-methylbenzene	106-38-7	Cc1ccc(Br)cc1	Aromatics
p-Chloro Acetophenone	1-(4-chlorophenyl)ethanone	99-91-2	CC(=O)c(cc1)ccc1Cl	Ketone	Aromatics
p-Chloronitrobenzene	1-chloro-4-nitrobenzene	100-00-5	Clc1ccc(cc1)N(=O)=O	Nitrogen	Aromatics
p-Chlorostyrene	p-chlorostyrene	1073-67-2	Clc1ccc(C=C)cc1	Alkene	Aromatics
p-Chlorotoluene	1-chloro-4-methylbenzene	106-43-4	Cc1ccc(Cl)cc1	Aromatics
p-Dichlorobenzene	1,4-dichlorobenzene	106-46-7	Clc1ccc(Cl)cc1	Aromatics
p-Diethyl Benzene	1,4-diethylbenzene	105-05-5	CCc1ccc(CC)cc1	Aromatics
p-Divinyl Benzene	p-divinylbenzene	105-06-6	C=Cc1ccc(C=C)cc1	Alkene	Aromatics
p-Fluoroanisole	4-fluoroanisole	459-60-9	COc(cc1)ccc1F	Ether	Aromatics
p-Nitro Toluene	1-methyl-4-nitro-benzene	99-99-0	Cc1ccc(cc1)N(=O)=O	Nitrogen	Aromatics
Paracetamol	4-hydroxyacetanilide	103-90-2	Oc1ccc(cc1)NC(C)=O	Amide	Aromatics
Paraldehyde	paraldehyde	123-63-7	CC1OC(C)OC(C)O1	Ether
Pentachloro Ethane	pentachloroethane	76-01-7	ClC(Cl)C(Cl)(Cl)Cl	AlkylHalide
Pentachlorophenol	pentachlorophenol	87-86-5	Oc1c(Cl)c(Cl)c(Cl)c(Cl)c1Cl	Aromatics
Pentanal (Valeraldehyde)	valeraldehyde	110-62-3	CCCCC=O	Aldehyde
Pentane	pentane	109-66-0	CCCCC	Alkane
Pentanoic Acid	n-bucooh	109-52-4	CCCCC(O)=O	Carboxylic Acid
Perfluoro Ethylene (Tetrafluoro Ethylene	tetrafluoroethene	116-14-3	FC(F)=C(F)F	Alkene
Perfluorobutane	decafluorobutane	355-25-9	FC(F)(F)C(F)(F)C(F)(F)C(F)(F)F	AlkylHalide
Perfluoroheptane	perfluoroheptane	335-57-9	FC(F)(F)C(F)(F)C(F)(F)C(F)(F)C(F)(F)C(F)(F)C(F)(F)F	AlkylHalide
Perfluorohexane (PFC 5060)	perfluoro-n-hexane	355-42-0	FC(F)(F)C(F)(F)C(F)(F)C(F)(F)C(F)(F)C(F)(F)F	AlkylHalide
Perfluoromethylcyclohexane	perfluoromethylcyclohexane	355-02-2	FC(F)(F)C(F)(C(F)(F)C1(F)F)C(F)(F)C(F)(F)C1(F)F	AlkylHalide
Perfluoropentane (PFC 5050)	perfluoropentane	678-26-2	FC(F)(F)C(F)(F)C(F)(F)C(F)(F)C(F)(F)F	AlkylHalide
Phenetole (Ethyl Phenyl Ether)	ethoxybenzene	103-73-1	CCOc1ccccc1	Ether	Aromatics
Phenol	phenol	108-95-2	Oc1ccccc1	Aromatics
Phenyl Acetate	phenylacetate	122-79-2	CC(=O)Oc1ccccc1	Ester	Aromatics
Phenyl Acetonitrile	phenylacetonitrile	140-29-4	N#CCc1ccccc1	Nitrile	Aromatics
Phenyl Acetylene	ethynylbenzene	536-74-3	C#Cc1ccccc1	Alkyne	Aromatics
Phenylhydrazine	phenyl-hydrazine	100-63-0	NNc1ccccc1	Amine	Aromatics
Phosgene	carbonicdichloride	75-44-5	ClC(Cl)=O
Phosphoric Acid	phosphoricacid	7664-38-2	OP(O)(O)=O	Phosphorus
Phosphorous Oxychloride	pocl3	10025-87-3	ClP(Cl)(Cl)=O	Phosphorus
Phosphorus Trichloride	pcl3	7719-12-2	ClP(Cl)Cl
Phthalic Anhydride	phthalicanhydride	85-44-9	O=C2c1ccccc1C(O2)=O	AcidAnhydride	Ether
Picric Acid (2,4,6-Trinitrophenol)	2,4,6-trinitrophenol	88-89-1	Oc1c(cc(cc1N(=O)=O)N(=O)=O)N(=O)=O	Nitrogen	Aromatics
Piperazine	piperazine	110-85-0	C1NCCNC1	Amine
Piperidine	piperidine	110-89-4	N1CCCCC1	Amine
Propane	propane	74-98-6	CCC	Alkane
Propargylaldehyde	2-propynal	624-67-9	C#CC=O	Aldehyde	Alkyne
Propionaldehyde	propanal	123-38-6	CCC=O	Aldehyde
Propionaldehyde - 2,3-Epoxy	glycidylaldehyde	765-34-4	O=CC1OC1	Aldehyde	Ether
Propionamide	propanamide	79-05-0	CCC(=O)N	Amide
Propionic Acid	propionicacid	79-09-4	CCC(O)=O	Carboxylic Acid
Propionic Anhydride	propanoicacid,anhydride	123-62-6	CCC(OC(CC)=O)=O	AcidAnhydride	Ether
Propionitrile	propionitrile	107-12-0	CCC#N	Nitrile
Propionylchloride	propionylchloride	79-03-8	CCC(Cl)=O	Acylhalide
Propyl Amine	n-propylamine	107-10-8	NCCC	Amine
Propyl Chloride	1-chloropropane	540-54-5	CCCCl	AlkylHalide
Propyl Formate	n-propylformate	110-74-7	CCCOC=O	Ester
Propyl Methacrylate	propylmethacrylate	2210-28-8	CCCOC(=O)C(C)=C	Ester	Alkene
Propylene	propene	115-07-1	CC=C	Alkene
Propylene Carbonate	propylenecarbonate	108-32-7	CC1OC(OC1)=O	Ester
Propylene Chlorohydrin	1-chloro-2-propanol	127-00-4	ClCC(O)C	Alcohol	AlkylHalide
Propylene Glycol	propyleneglycol	57-55-6	OCC(O)C	Alcohol
Propylene Glycol Mono-t-Butyl Ether	1-(1,1-dimethylethoxy)-2-propanol	57018-52-7	OC(C)COC(C)(C)C	Alcohol	Ether
Propylene Glycol Monobutyl Ether	1-butoxy-2-propanol	5131-66-8	CCCCOCC(O)C	Alcohol	Ether
Propylene Glycol Monoethyl Ether	1-ethoxy-2-propanol	1569-02-4	CCOCC(O)C	Alcohol	Ether
Propylene Glycol Monoethyl Ether Acetate	1-ethoxy-2-propanol-acetate	54839-24-6	CCOCC(C)OC(C)=O	Ester	Ether
Propylene Glycol Monoisopropyl Ether	1-isopropoxy-2-propanol	3944-36-3	OC(C)COC(C)C	Alcohol	Ether
Propylene Glycol Monomethyl Ether	1-methoxy2-propanol	107-98-2	COCC(O)C	Alcohol	Ether
Propylene Glycol Monomethyl Ether Acetate	1-methoxy-2-acetoxypropane	108-65-6	COCC(C)OC(C)=O	Ester	Ether
Propylene Glycol Monophenyl Ether	1-phenoxy-2-propanol	770-35-4	OC(C)COc1ccccc1	Alcohol	Ether	Aromatics
Propylene Glycol Monopropyl Ether	1-propoxy-2-propanol	1569-01-3	CCCOCC(O)C	Alcohol	Ether
Propylene Imine (2-Methyl Aziridine)	2-methylaziridine	75-55-8	CC1NC1	Amine
Propylene Oxide	1,2-epoxypropane	75-56-9	CC1OC1	Ether
Propynonitrile	propiolonitrile	1070-71-9	N#CC#C	Nitrile	Alkyne
Pulegone	pulegone	89-82-7	CC(CCC1=C(C)C)CC1=O	Ketone	Alkene
Pyrazole	pyrazole	288-13-1	c1n[nH]cc1	Aromatics
Pyridazine	pyridazine	289-80-5	n1ccccn1	Aromatics
Pyridine	pyridine	110-86-1	n1ccccc1	Aromatics
Pyrimidine	pyrimidine	289-95-2	c1ncccn1	Aromatics
Pyrogallol (1,2,3-Trihydroxybenzene)	1,2,3-trihydroxybenzene	87-66-1	Oc1cccc(O)c1O	Aromatics
Pyrrole	pyrrole	109-97-7	c1c[nH]cc1	Aromatics
Pyrrolidine	pyrrolidine	123-75-1	N1CCCC1	Amine
Pyruvonitrile	2-oxo-propanenitrile	631-57-2	CC(=O)C#N	Nitrile	Ketone
Quinine	quinine	130-95-0	COc(ccc1ncc2)cc1c2C(O)C3CC4CCN3CC4C=C	Alcohol	Amine	Alkene	Ether	Aromatics
Quinoline	chinoline	91-22-5	c2nc1ccccc1cc2	Aromatics
Saccharin	saccharin	81-07-2	O=C(c1ccccc21)NS2(=O)=O
Salicylaldehyde	salicylicaldehyde	90-02-8	Oc1ccccc1C=O	Aldehyde	Aromatics
Salicylic Acid	salicylicacid	69-72-7	OC(=O)c1ccccc1O	Carboxylic Acid	Aromatics
Sebacic Acid	decanedioicacid	111-20-6	OC(CCCCCCCCC(O)=O)=O	Carboxylic Acid
sec-Butyl Acetate	sec-butylacetate	105-46-4	CCC(C)OC(C)=O	Ester
Skatole	methylindole	83-34-1	Cc1c[nH]c2c1cccc2	Aromatics
Stearic Acid	octadecanoicacid	57-11-4	CCCCCCCCCCCCCCCCCC(O)=O	Carboxylic Acid
Styrene	styrene	100-42-5	C=Cc1ccccc1	Alkene	Aromatics
Styrene Oxide (Phenyl Oxirane)	styreneoxide	96-09-3	C1OC1c2ccccc2	Ether	Aromatics
Succinic Anhydride	dihydro-2,5-furandione	108-30-5	O=C1OC(CC1)=O	AcidAnhydride	Ether
Succinonitrile	butanedinitrile	110-61-2	N#CCCC#N	Nitrile
Sulfanilamide	sulfanilamide	63-74-1	Nc1ccc(cc1)S(=O)(=O)N	Amine	Aromatics
Sulfolane (Tetramethylene Sulfone)	tetrahydrothiophene-1,1-dioxide	126-33-0	O=S1(CCCC1)=O	Sulfur
Sulfur Dicyanide	sulfurcyanide	627-52-1	N#CSC#N	Nitrile	Sulfide	Nitrogen
Sulfur Dioxide	so2	7446-09-5	O=S=O	Sulfide
Sulfuryl Chloride	sulfurylchloride	7791-25-5	ClS(Cl)(=O)=O
t-Butyl Acetate	tert-butylacetate	540-88-5	CC(C)(C)OC(C)=O	Ester
t-Butyl Alcohol	tert-butanol	75-65-0	OC(C)(C)C	Alcohol
Terephthalic Acid	1,4-benzenedicarboxylicacid	100-21-0	OC(=O)c1ccc(C(O)=O)cc1	Carboxylic Acid	Aromatics
Tetrachloroethylene	tetrachloroethene	127-18-4	ClC(Cl)=C(Cl)Cl	Alkene
Tetraethylorthosilicate	ethylsilicate	78-10-4	CCO[Si](OCC)(OCC)OCC	Silicon
Tetrahydrofuran (THF)	thf	109-99-9	O1CCCC1	Ether
Tetrahydrofurfuryl Alcohol	tetrahydrofurfurylalcohol	97-99-4	OCC1CCCO1	Alcohol	Ether
Tetrahydronaphthalene	tetralin	119-64-2	C(CCc1cc2)Cc1cc2	Alkane
Tetrahydropyran	thp	142-68-7	O1CCCCC1	Ether
Tetrahydrothiapyran	tetrahydro-2h-thiopyran	1613-51-0	C1CCSCC1	Sulfide	Ether
Tetramethylene Sulfide	tetrahydrothiophene	110-01-0	C1CSCC1	Sulfide	Ether
Tetramethylene Sulfoxide	tetramethylenesulfoxide	1600-44-8	O=S1CCCC1	Sulfur
Tetramethylurea	tetramethylurea	632-22-4	CN(C)C(=O)N(C)C	Ketone
Tetranitromethane	tetranitro-methane	509-14-8	O=N(=O)C(N(=O)=O)(N(=O)=O)N(=O)=O	Nitrogen
Thiazole	thiazole	288-47-1	n1cscc1	Aromatics
Thioacetamide	ethanethioamide	62-55-5	CC(N)=S	Alkane
Thioacetic Acid	thioaceticacid	507-09-5	CC(S)=O	Sulfide
Thiocyanic Acid	thiocyanicacid	463-56-9	SC#N	Nitrile	Sulfide	Nitrogen
Thiodiethylenglycol	2,2'-thiobisethanol	111-48-8	OCCSCCO	Alcohol	Sulfide	Ether
Thioglycolic Acid (Mercapto Acetic Acid)	mercaptoaceticacid	68-11-1	SCC(O)=O	Carboxylic Acid	Sulfide
Thionyl Chloride	thionylchloride	7719-09-7	ClS(Cl)=O
Thiophene	thiophene	110-02-1	c1cscc1	Aromatics
Thiophenol	thiophenol	108-98-5	Sc1ccccc1	Sulfide	Aromatics
Thiourea	thiourea	62-56-6	NC(N)=S
Thiourea From Urea Min Sphere	thiourea	62-56-6	NC(N)=S
Thymine	thymine	65-71-4	Cc1c[nH]c(=O)[nH]c1=O	Amide	Ketone	Aromatics
Thymol	thymol	89-83-8	CC(C)c1ccc(C)cc1O	Aromatics
Tigaldehyde	trans-2-methyl-2-butenal	497-03-0	CC=C(C)C=O	Aldehyde	Alkene
Toluene	toluene	108-88-3	Cc1ccccc1	Aromatics
Trans-Crotononitrile	(e)-2-butenenitrile	627-26-9	CC=CC#N	Nitrile	Alkene
Trans-Decahydronaphthalene	trans-decalin	493-02-7	C2CC1CCCCC1CC2	Alkane
Tri-n-Butyl Borate	tributoxyborane	688-74-4	CCCCOB(OCCCC)OCCCC	Alkane
Tri-n-Butyl Phosphate	tri-n-butylphosphate	126-73-8	CCCCOP(OCCCC)(OCCCC)=O	Phosphorus
Trichloroacetic Acid	trichloroaceticacid	76-03-9	ClC(Cl)(Cl)C(O)=O	Carboxylic Acid	AlkylHalide
Trichloroacetonitrile	trichloroacetonitrile	545-06-2	ClC(Cl)(Cl)C#N	Nitrile	AlkylHalide
Trichloroethylene	trichloroethene	79-01-6	ClC=C(Cl)Cl	Alkene
Trichlorofluoromethane (Freon 11)	cfcl3	75-69-4	FC(Cl)(Cl)Cl	AlkylHalide
Trichloromethylsilane	trichloromethylsilane	75-79-6	C[Si](Cl)(Cl)Cl	Silicon
Trichlorosilane	trichlorosilane	10025-78-2	Cl[SiH](Cl)Cl
Tricyclene	tricyclene	508-32-7	CC3(C)C2CC(C1C2)C31C	Alkane
Tridecyl Alcohol	1-tridecanol	112-70-9	OCCCCCCCCCCCCC	Alcohol
Triethanolamine	triethanolamine	102-71-6	OCCN(CCO)CCO	Alcohol	Amine
Triethyl Citrate	triethylcitrate	77-93-0	CCOC(CC(O)(CC(OCC)=O)C(OCC)=O)=O	Ester	Alcohol
Triethylamine	triethylamine	121-44-8	CCN(CC)CC	Amine
Triethylene Glycol	triethyleneglycol	112-27-6	OCCOCCOCCO	Alcohol	Ether
Triethylene Glycol Monomethyl Ether	2-2-(2-methoxyethoxy)ethoxyethanol	112-35-6	COCCOCCOCCO	Alcohol	Ether
Triethylphosphate	triethylphosphate	78-40-0	CCOP(OCC)(OCC)=O	Phosphorus
Trifluoroacetic Acid	trifluoroaceticacid	76-05-1	FC(F)(F)C(O)=O	Carboxylic Acid	AlkylHalide
Trifluoromethane (Freon 23)	chf3	75-46-7	FC(F)F	AlkylHalide
Trimethyl Amine	trimethylamine	75-50-3	CN(C)C	Amine
Trimethylbenzene	1,2,4-trimethylbenzene	95-63-6	Cc(ccc1C)cc1C	Aromatics
Trimethylene Sulfide	thiacyclobutane	287-27-4	C1CSC1	Sulfide	Ether
Trimethylphosphate	trimethylphosphate	512-56-1	COP(OC)(OC)=O	Phosphorus
Trinitromethane	trinitromethane	517-25-9	O=N(=O)C(N(=O)=O)N(=O)=O	Nitrogen
Trinitrotoluene (TNT) (DM)	2-methyl-1,3,5-trinitrobenzene	118-96-7	Cc1c(cc(cc1N(=O)=O)N(=O)=O)N(=O)=O	Nitrogen	Aromatics
Trinitrotoluene (TNT) (G.C.)	2-methyl-1,3,5-trinitrobenzene	118-96-7	Cc1c(cc(cc1N(=O)=O)N(=O)=O)N(=O)=O	Nitrogen	Aromatics
Triphenyl Phosphate	triphenylphosphate	115-86-6	O=P(Oc3ccccc3)(Oc2ccccc2)Oc1ccccc1	Phosphorus	Aromatics
Undecane	n-undecane	1120-21-4	CCCCCCCCCCC	Alkane
Urea For Ro Equal 19.4	urea	57-13-6	O=C(N)N	Ketone
Urea Min Sphere	urea	57-13-6	O=C(N)N	Ketone
Valeronitrile	valeronitrile	110-59-8	CCCCC#N	Nitrile
Vanillin (4-Hydroxy-3-Methoxy Benzaldehy	4-hydroxy-3-methoxybenzaldehyde	121-33-5	COc1cc(C=O)ccc1O	Aldehyde	Ether	Aromatics
Vinyl 2-Chloro Ethyl Ether	(c-chloroethoxy)ethene	110-75-8	ClCCOC=C	Ether	AlkylHalide
Vinyl Acetate	vinylacetate	108-05-4	CC(OC=C)=O	Ester
Vinyl Acetylene	butenyne	689-97-4	C#CC=C	Alkene	Alkyne
Vinyl Allyl Ether	allylvinylether	3917-15-5	C=COCC=C	Alkene	Ether
Vinyl Butyl Ether	butylvinylether	111-34-2	CCCCOC=C	Ether
Vinyl Butyrate	vinylbutyrate	123-20-6	CCCC(OC=C)=O	Ester
Vinyl Chloride	chloroethene	75-01-4	ClC=C	Alkene
Vinyl Ether	divinylether	109-93-3	C=COC=C	Ether
Vinyl Ethyl Sulfide	ethylvinylsulfide	627-50-9	CCSC=C	Sulfide	Ether
Vinyl Formate	vinylformate	692-45-5	O=COC=C	Ester
Vinyl Iodide (Iodoethene)	iodoethene	593-66-8	IC=C	Alkene
Vinyl Isobutyl Ether	isobutylvinylether	109-53-5	CC(C)COC=C	Ether
Vinyl Isopropyl Ether	2-(ethenyloxy)-propane	926-65-8	CC(C)OC=C	Ether
Vinyl Propionate	propanoicacidethenylester	105-38-4	CCC(OC=C)=O	Ester
Vinyl Propyl Ether	1-(ethenyloxy)propane	764-47-6	CCCOC=C	Ether
Vinyl Pyrrolidone	1-vinyl-2-pyrrolidinone	88-12-0	C=CN1CCCC1=O	Amide
Vinyl Trimethyl Silane	ethenyltrimethylsilane	754-05-2	C[Si](C)(C)C=C	Silicon
Vinylenecarbonate	1,3-dioxol-2-one	872-36-6	O=C1OC=CO1	Ester	Aromatics
Water	h2o	7732-18-5	O
Water 1% Soluble In - Ro=18.1	h2o	7732-18-5	O
Water Complete Misc. (R=13.0)	h2o	7732-18-5	O
Xylene	1,4-dimethylbenzene	106-42-3	Cc1ccc(C)cc1	Aromatics
ß-Propiolactone	beta-propiolactone	57-57-8	O=C1CCO1	Ester
α-Chloro Acetophenone	2-chloroacetophenone	532-27-4	ClCC(=O)c1ccccc1	Ketone	Aromatics	AlkylHalide
α-Chloro Methyl Acrylate	methyl2-chloroacrylate	80-63-7	COC(=O)C(Cl)=C	Ester	Alkene
γ-Butyrolactone (GBL)	gamma-butyrolactone	96-48-0	O=C1CCCO1	Ester
γ-Thiobutyrolactone	dihydrothiophen-2(3h)-one	1003-10-7	O=C1SCCC1	Sulfide
1,4-dichloro-2-butyne	1,4-dichloro-2-butyne	821-10-3	ClCC#CCCl	Alkyne	AlkylHalide
1,2-dibromoethylene	trans-dibromoethene	590-12-5	BrC=CBr	Alkene
o-xylene	1,2-dimethylbenzene	95-47-6	Cc1ccccc1C	Aromatics
dipropyleneglycolmethylether	dipropyleneglycolmonomethylether	34590-94-8	COC(C)COCC(O)C	Alcohol	Ether
butadienedioxide	1,2-3,4-diepoxybutane	564-00-1	C1OC1C2OC2	Ether
propylenechlorohydrin	2-chloro-1-propanol	78-89-7	OCC(C)Cl	Alcohol	AlkylHalide
dimethylmethylphosphonate	dimethylmethylphosphonate	765-79-6	COP(C)(OC)=O	Phosphorus
ethylamylketone	5-methyl-3-heptanone	541-85-5	CCC(C)CC(CC)=O	Ketone
propyleneglycolmonophenylether	propyleneglycolmonophenylether	4169-04-4	OCC(C)Oc1ccccc1	Alcohol	Ether	Aromatics
dipropyleneglycol	dipropyleneglycol	25265-71-8	OC(C)COCC(O)C	Alcohol	Ether
di-n-butylsulfoxide	1,1'-sulfonylbisbutane	598-04-9	CCCCS(CCCC)(=O)=O	Sulfur
vinylaceticacid	3-butenoicacid	625-38-7	OC(CC=C)=O	Carboxylic Acid	Alkene
hexyleneglycol	2-methyl-2,4-pentanediol	107-41-5	OC(C)CC(O)(C)C	Alcohol
crotonaldehyde	cis-crotonaldehyde	15798-64-8	CC=CC=O	Aldehyde	Alkene
2,3-dimethyl-1-butene	2,3-dimethyl-1-butene	563-78-0	CC(C)C(C)=C	Alkene
ethylcinnamate	ethylcinnamate		CCOC(=O)C=Cc1ccccc1	Ester	Alkene	Aromatics
dimethylethanolamine	dimethylethanolamine	2854-16-2	NCC(O)(C)C	Alcohol	Amine
propyleneglycolmonoethylether	1,2-propanediolmonoethylether	52125-53-8	CCOC(O)CC	Ether
dioctylphthalate	1,2-benzenedicarboxylicaciddioctylester	117-84-0	CCCCCCCCOC(=O)c1ccccc1C(OCCCCCCCC)=O	Ester	Aromatics
isopropylpalmitate	isopropylpalmitate		CCCCCCCCCCCCCCC(OCC(C)C)=O	Ester
glutaric anhydride	dihydro-2h-pyran-2,6(3h)-dione	108-55-4	O=C1OC(CCC1)=O	AcidAnhydride	Ether
GVL	dihydro-5-methyl-2(3h)-furanone	108-29-2	CC1OC(CC1)=O	Ester
chloromethyl methyl ether	chloromethoxymethane	107-30-2	COCCl	Ether	AlkylHalide
chloromethyl acetate	chloromethacetate	625-56-9	ClCOC(C)=O	Ester	AlkylHalide
bromodichloromethane	chcl2br	75-27-4	ClC(Cl)Br	AlkylHalide
chlorofluoromethane	ch2fcl	593-70-4	FCCl	AlkylHalide
chloroiodomethane	ch2cli	593-71-5	ClCI	AlkylHalide
carbon tetrafluoride	cf4	75-73-0	FC(F)(F)F	AlkylHalide
camphor	camphor	76-22-2	CC1(C)C(CCC21C)CC2=O	Ketone
butyl isobutyrate	butylisobutyrate	97-87-0	CCCCOC(C(C)C)=O	Ester
bromoacetic acid	bromoaceticacid	79-08-3	BrCC(O)=O	Carboxylic Acid	AlkylHalide
alpha-terpineol	alpha-terpineol	98-55-5	OC(C)(C)C1CC=C(C)CC1	Alcohol	Alkene
n-allylmethylamine	allylmethylamine	627-37-2	CNCC=C	Amine	Alkene
2-aminobutan-1-ol	2-amino-1-butanol	96-20-8	OCC(N)CC	Alcohol	Amine
benzyl formate	benzylformate	104-57-4	O=COCc1ccccc1	Ester	Aromatics

## Sheet: 30 common solvents
abbr	Lab name	Solvent name in cosmobase	CAS number	Boiling point (°C)	T higher (°C)	Hansen solubility parameter			EVOH		PE		PET		PP		PS		PVC		Nylon 6		Nylon 66
						D	P	H	RT	T higher	RT	T higher	RT	T higher	RT	T higher	RT	T higher	RT	T higher	RT	T higher	RT	T higher
	methanol	methanol	67-56-1	64.6	63.6	14.7	12.3	22.3	0.019638	0.835944	0.0046388	0.126187	5.76846e-06	0.000866969	0.0120756	0.101574	0.0019558	0.0377158	0.0993088	0.806893	0.0156831	0.251037	0.0063237	0.108351
DCM	dichloromethane	ch2cl2	75-09-2	40	39	17	7.3	7.1	0.000326203	0.00238234	0.0194024	0.0702077	0.331982	0.815363	0.234714	0.533229	4.62424	8.45342	2.70167	4.61247	0.858131	1.69228	0.238529	0.512779
	ethylene glycol	glycol	107-21-1	197.3	120	17	11	26	0.00341365	10.6063	0.000494141	0.937348	4.76276e-08	0.00425702	0.000363708	0.0803602	8.82399e-06	0.0197134	0.0120086	1.58107	0.00091578	0.403629	0.000336095	0.169559
	Acetone	propanone	67-64-1	56	55	15.5	10.4	7	0.0103445	0.225191	0.0277689	0.336457	0.0677364	0.745048	0.318495	1.3657	9.16065	21.3194	10.871	19.8281	0.0145867	0.185387	0.00755658	0.0923072
IPA	Isopropanol	2-propanol	67-63-0	82.3	81.3	15.8	6.1	16.4	0.00714268	1.36842	0.0186895	1.63348	1.91756e-05	0.0187989	0.14455	2.33005	0.0211934	1.20697	0.152234	2.923	0.0178774	0.983724	0.00786748	0.431013
	1-propanol	propanol	71-23-8	97.2	96.2	16	6.8	17.4	0.00696417	4.11561	0.0176282	4.22102	1.96345e-05	0.0839479	0.131457	4.07252	0.0188373	2.78339	0.145981	5.43392	0.0240765	2.56751	0.0104503	1.134
	toluene	toluene	108-88-3	110.6	109.6	18	1.4	2	2.24935e-06	0.263178	0.0540295	22.5646	0.00299708	2.53994	1.05658	30.853	3.64244	40.9649	0.709343	14.806	0.001341	1.34438	0.000281031	0.364255
	chloroform	chcl3	67-66-3	61.1	60.1	17.8	3.1	5.7	0.000734664	0.0321468	0.0307294	0.553461	0.216919	0.98853	0.54303	3.09457	2.26768	9.76203	1.07957	4.21308	4.39243	6.22446	1.91826	2.88226
THF	tetrahydrofuran	thf	109-99-9	65	64	16.8	5.7	8	0.0524046	0.916639	0.081061	1.70413	0.0379389	0.810312	1.98756	10.0874	13.9636	31.2636	8.89913	19.112	0.0214748	0.428894	0.0121449	0.214658
THP	tetrahydropyran	thp	142-68-7	88	87	16.4	6.3	6	0.00779213	1.10972	0.0804967	7.33539	0.00516292	0.762566	2.03579	20.9306	7.1863	33.677	3.87663	17.851	0.0064247	0.723214	0.00323971	0.302043
	cyclohexane	cyclohexane	110-82-7	80.7	79.7	16.8	0	0.2	8.84557e-08	0.000906749	0.135618	6.86629	2.55981e-06	0.00174282	3.9976	23.9615	0.189309	4.60544	0.0644877	1.15872	3.8523e-05	0.012671	4.70488e-06	0.0021723
	heptane	n-heptane	142-82-5	98.5	97.5	15.3	0	0	6.67679e-08	0.00627724	0.108465	15.27	1.36226e-06	0.00464815	2.85633	29.3102	0.097369	5.20803	0.0458513	1.68924	2.36934e-05	0.0323589	2.89133e-06	0.00597729
	triethylamine	triethylamine	121-44-8	89	88	15.5	0.4	1	nan	7.66601	0.102196	8.73731	0.000110268	0.0353267	2.76087	23.1542	0.783691	12.943	0.537246	4.69569	0.00357651	0.172334	0.00256376	0.073362
	1,2-propanediol	propyleneglycol	57-55-6	187.6	120	16.8	10.4	21.3	0.00461072	12.4401	0.00208871	3.23292	5.89451e-07	0.032312	0.00424179	0.600192	0.000230726	0.264656	0.036497	3.81505	0.0046867	1.66829	0.00184042	0.708076
DMSO	dimethyl sulfoxide	dimethylsulfoxide	67-68-5	189	120	18.4	16.4	10.2	1.2609	35.3303	0.00847349	5.2659	0.04174	8.27386	0.049	1.67906	1.45108	18.1951	8.39491	33.2395	0.0144771	3.04304	0.00789444	1.64717
	hexane	hexane	110-54-3	68.7	67.7	14.9	0	0	7.84922e-08	0.000146332	0.128799	3.11122	2.09706e-06	0.000392266	3.56877	16.1821	0.148302	1.86359	0.056912	0.578028	3.1666e-05	0.00343279	3.85206e-06	0.000550348
	acetylacetone	acetylacetone	123-54-6	138	120	16.1	10	6.2	0.000527757	6.62643	0.00654888	8.23833	0.00149947	2.02435	0.0352179	3.02385	0.480787	22.9839	2.09437	23.661	0.00122027	1.66764	0.000546481	0.701477
	tert-butanol	tert-butanol	75-65-0	82.4	81.4	15.2	5.1	14.7	0.00450682	0.870071	0.0252902	2.10588	2.8396e-05	0.0225963	0.255398	3.79977	0.0405752	1.99315	0.186312	3.28119	0.0116214	0.708127	0.00517811	0.302586
EtOAc	ethyl acetate	ethylacetate	141-78-6	77.1	76.1	15.8	5.3	7.2	0.00119283	0.281551	0.0288252	1.60342	0.00798528	0.536704	0.393072	4.2693	5.38722	24.9121	4.48558	16.28	0.00552913	0.368937	0.00256248	0.159182
	isopropylamine	isopropylamine	75-31-0	31.7	30.7	14.8	4.4	6.6	11.1126	11.6502	0.0537713	0.0896615	0.0142776	0.0268636	0.845092	1.14201	1.84808	2.70108	3.26009	4.17425	0.0509467	0.078809	0.030144	0.0464356
	diphenyl ether	diphenylether	101-84-8	258	120	19.4	3.4	4	1.86057e-06	0.442716	0.0163487	18.5345	0.000970767	1.41513	0.186362	13.0038	0.775559	25.2938	0.274443	8.80101	0.000646601	1.03215	0.000143498	0.294339
	dodecane	dodecane	112-40-3	216.3	120	16	0	0	3.96817e-08	0.0421229	0.0635625	32.4561	3.8584e-07	0.00915868	1.43799	31.0711	0.0286538	4.05743	0.0235299	1.99908	9.88864e-06	0.0694214	1.21335e-06	0.0139405
DMF	N,N-dimethylformamide	dimethylformamide	68-12-2	153	120	17.4	13.7	11.3	0.167752	30.8026	0.0204049	16.2081	0.154304	18.3548	0.207871	8.99778	7.37741	47.8679	12.0747	41.9121	0.0226289	7.34856	0.0130536	4.0003
DHP	2,3-dihydropyran	2,3-dihydropyran	110-87-2	86	85	17.5	5.5	5.7	7.48348e-05	0.112316	0.0527038	5.03055	0.00428899	0.723403	1.02566	14.4262	5.0871	31.1805	1.93327	13.5543	0.00326816	0.525065	0.00104019	0.170405
MeOAc	methylacetate	methylacetate	79-20-9	56.8	55.8	15.5	7.2	7.6	0.00140072	0.0509512	0.0193158	0.264784	0.0116307	0.173186	0.195369	0.967504	4.87437	14.895	5.36285	12.2539	0.00596281	0.0939634	0.00275363	0.0419697
	ethanol	ethanol	64-17-5	78.2	77.2	15.8	8.8	19.4	0.0134713	1.76614	0.0124734	0.873345	2.38681e-05	0.0152413	0.0688397	1.01941	0.0142057	0.66993	0.176574	2.77467	0.0228956	0.945336	0.00992221	0.422882
	cyclohexanol	cyclohexanol	108-93-0	160.8	120	17.4	4.1	13.5	0.00221348	7.68889	0.0207882	22.1268	7.16119e-06	0.259564	0.20898	14.672	0.0168175	8.40549	0.0896888	8.62565	0.00788111	3.6781	0.00343151	1.5126
MEK	2-butanone	butanone	78-93-3	79.5	78.5	16	9	5.1	0.0046285	0.843741	0.0347995	2.25202	0.0210693	1.44648	0.489353	5.7429	6.92981	30.871	6.49638	21.782	0.0091954	0.65978	0.0045721	0.301364
	water	h2o	7732-18-5	100	99	15.5	16	42.3	5.70953e-05	0.0242914	7.0456e-08	6.41153e-05	8.4399e-19	2.46969e-14	8.37756e-11	2.13922e-08	7.93071e-18	6.04658e-14	2.81139e-08	7.62151e-06	1.01576e-06	1.6804e-06	2.63474e-07	5.75099e-07
	benzene	benzene	71-43-2	80	79	18.4	0	2	3.81227e-06	0.0144562	0.0432755	3.05416	0.00923744	0.914112	0.714442	9.62522	5.25521	29.3117	0.98659	8.12129	0.00232024	0.295697	0.000509304	0.0773066
